# Supplementary material for: ErbB signaling is a potential therapeutic target for vascular lesions with fibrous component
Source: eLife journal article supplement (doi:10.7554/elife.82543), 2023-05-18
Supplement: fig2-figsupp1-data1 [file elife-82543-fig2-figsupp1-data1-v2.zip]

# Full unedited gels for Fig 3 – figure supplement 1D

CD31

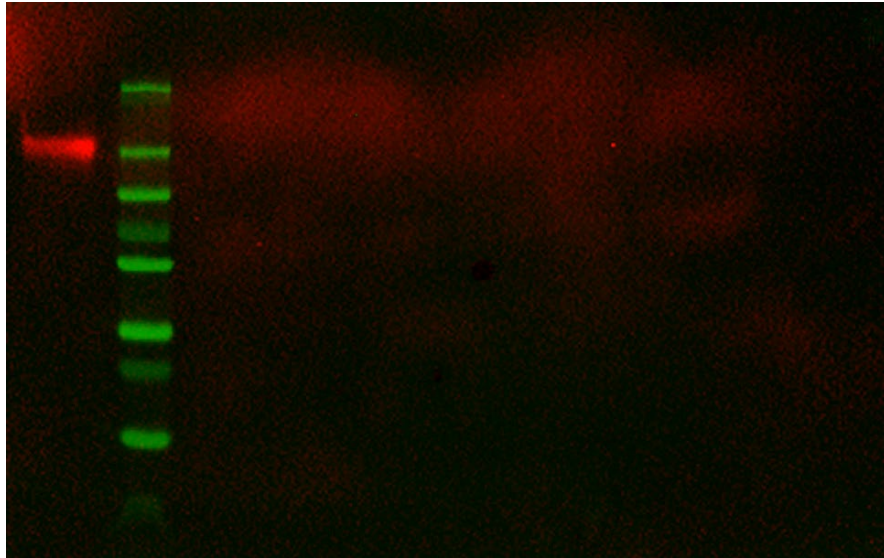

$\beta$ -actin

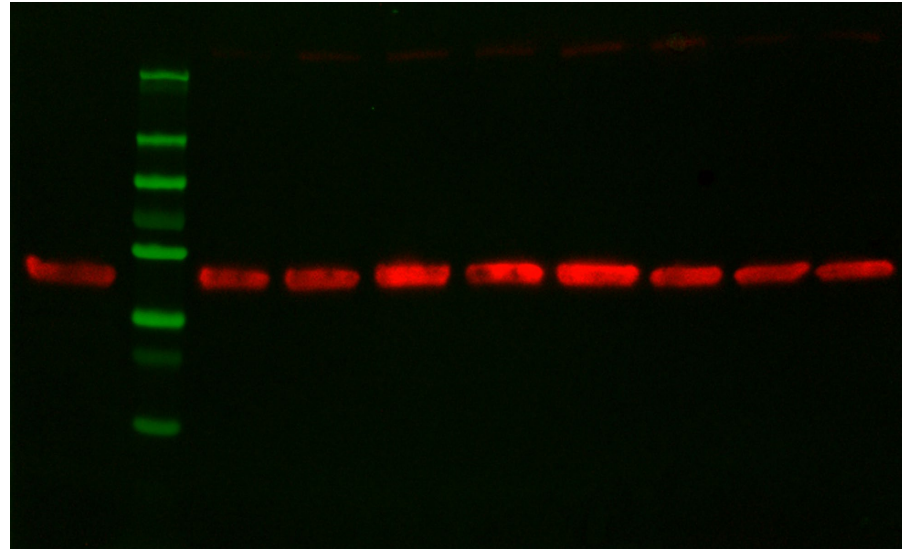

2nd sample from right  
excluded due to  
pathological diagnosis  
--> Atypical VM; some  
features of Maffucci  
syndrome

These lanes were  
included in the Figure

These lanes were  
included in the Figure

# Full unedited gels for Fig 3 – figure supplement 1E

Vimentin

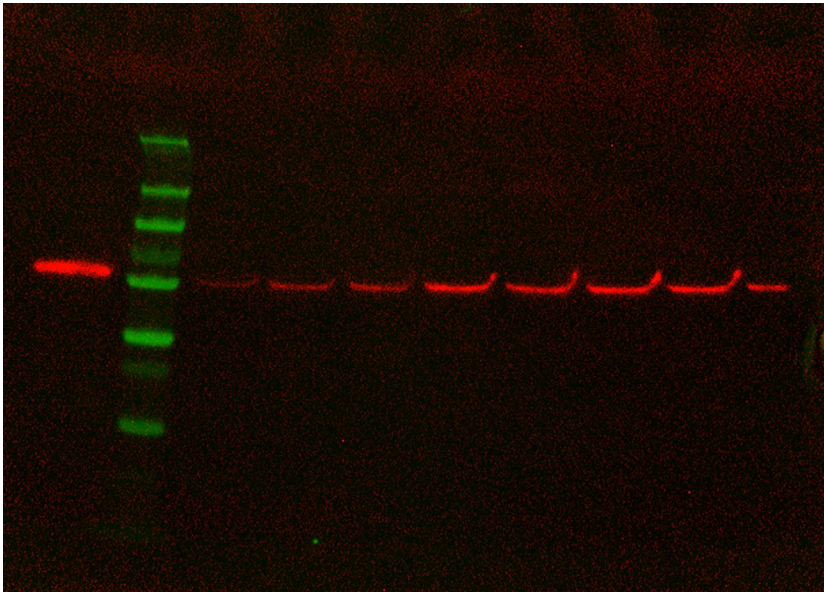

These lanes were  
included in the Figure

$\beta$ -actin

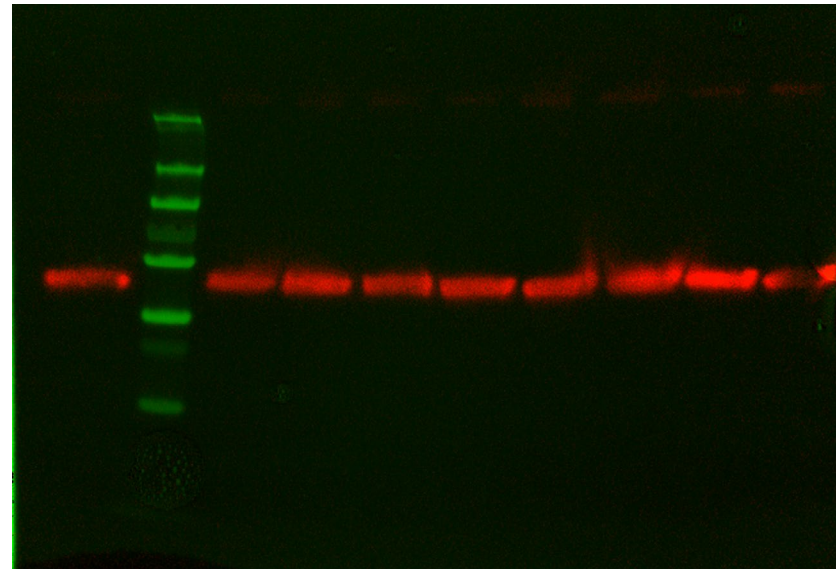

These lanes were  
included in the Figure

2nd sample from right  
excluded due to  
pathological diagnosis  
--> Atypical VM; some  
features of Maffucci  
syndrome

# Full unedited gels for Fig 3 – figure supplement 1F

$\alpha$ SMA

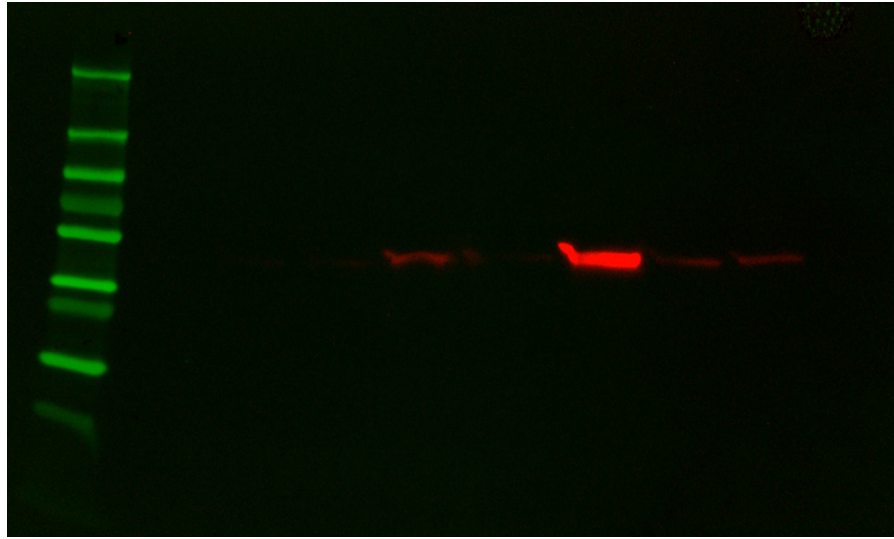

These lanes were  
included in the Figure

$\beta$ -actin

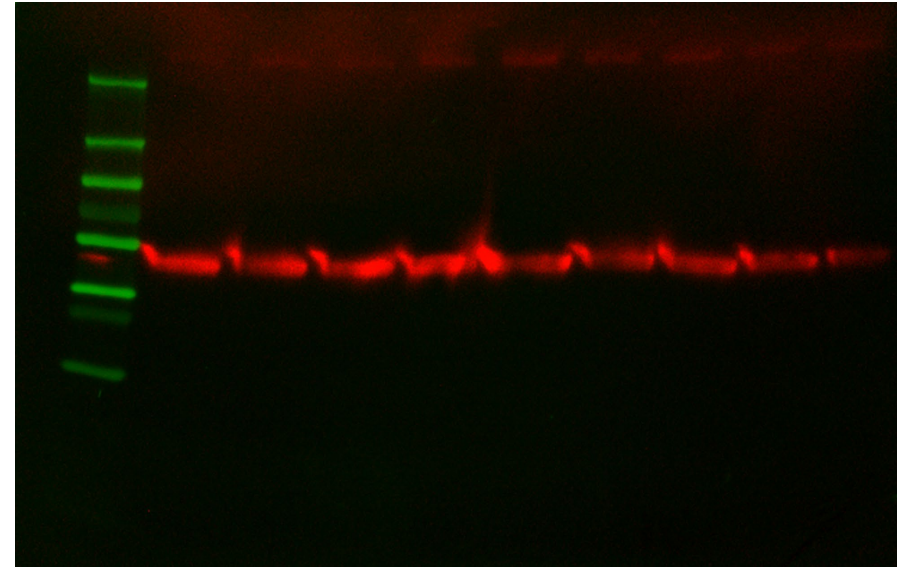

These lanes were  
included in the Figure

2nd sample from right  
excluded due to  
pathological diagnosis  
--> Atypical VM; some  
features of Maffucci  
syndrome
