# Supplementary material for: ErbB signaling is a potential therapeutic target for vascular lesions with fibrous component
Source: eLife journal article supplement (doi:10.7554/elife.82543), 2023-05-18
Supplement: fig6-data1 [file Fig 6 - source file.pdf › Fig 6A - source file/Fig 6 - source file.pdf]

# Full unedited gels for Figure 6A

pEGFR

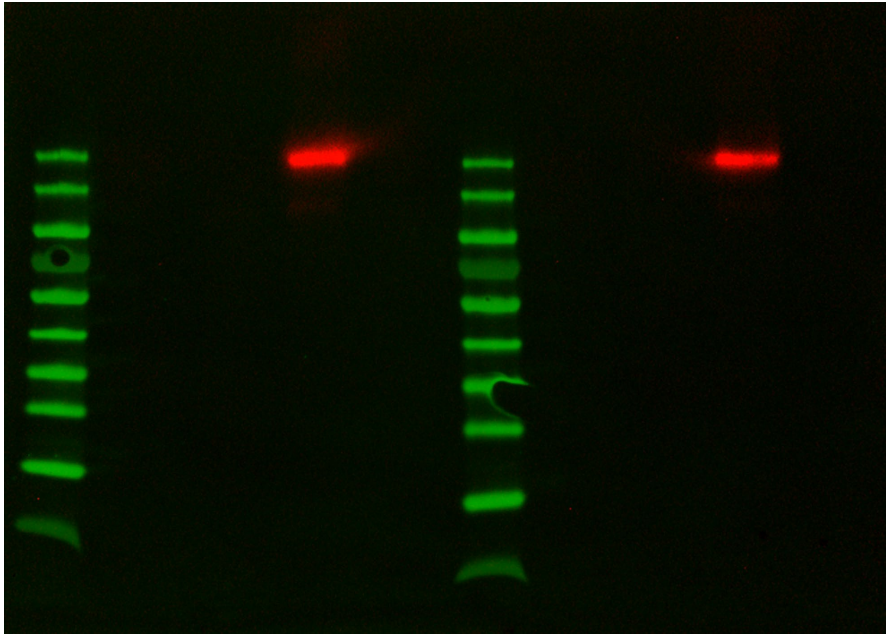

These lanes were  
included in the Figure

Total EGFR

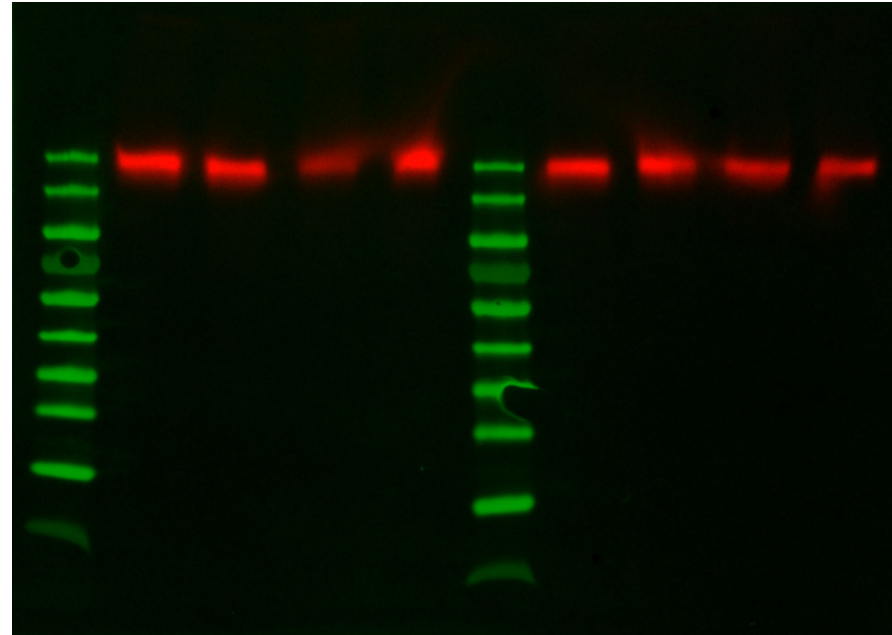

These lanes were  
included in the Figure
