# Supplementary material for: ErbB signaling is a potential therapeutic target for vascular lesions with fibrous component
Source: eLife. 2023 May 18;12:e82543. doi: 10.7554/eLife.82543 (PMC10260011; doi:10.7554/eLife.82543)
Supplement: Supplementary file 1. [file elife-82543-supp1.xlsx]

## Sheet: A1-3. Summary_seq_exps
SUPPLEMENTAL MATERIAL: NGS EXPERIMENTS
A. SUMMARY OF THE SAMPLES USED IN SEQUENCING EXPERIMENTS
Table A1: Experiments with patient-derived and control ECs
Samples	Method
HUVEC_Pt1	RNA-sequencing
HUVEC_Pt2	RNA-sequencing
HUVEC_Pt3	RNA-sequencing
HsaVEC_Pt1	RNA-sequencing
HsaVEC_Pt2	RNA-sequencing
HsaVEC_Pt3	RNA-sequencing
VascAn_Pt1	RNA-sequencing
VascAn_Pt2	RNA-sequencing
VascAn_Pt3	RNA-sequencing
VascAn_Pt4	RNA-sequencing
VascAn_Pt22	RNA-sequencing
Table A2: Experiments with PIK3CAmut+ patient-derived ECs and control ECs
Samples	Method
Control_HUVEC_Pt1	RNA-sequencing
Control_HUVEC_Pt2	RNA-sequencing
Control_HUVEC_Pt3	RNA-sequencing
Control_HsaVEC_Pt1	RNA-sequencing
Control_HsaVEC_Pt2	RNA-sequencing
Control_HsaVEC_Pt3	RNA-sequencing
PIK3CAmut+ Patient EC_VascAn_Pt2	RNA-sequencing
PIK3CAmut+ Patient EC_VascAn_Pt3	RNA-sequencing
PIK3CAmut+ Patient EC_VascAn_Pt4	RNA-sequencing
Table A3: Experiments with PIK3CAH1047R and PIK3CAwt -transduced HUVECs
Samples	Method
PIK3CAH1047R_sample 1	RNA-sequencing
PIK3CAH1047R_sample 2	RNA-sequencing
PIK3CAH1047R_sample 3	RNA-sequencing
PIK3CAH1047R_sample 4	RNA-sequencing
PIK3CAwt_sample 1	RNA-sequencing
PIK3CAwt_sample 2	RNA-sequencing
PIK3CAwt_sample 3	RNA-sequencing
PIK3CAwt_sample 4	RNA-sequencing
non-transduced_sample 1	RNA-sequencing
non-transduced_sample 2	RNA-sequencing
non-transduced_sample 3	RNA-sequencing
non-transduced_sample 4	RNA-sequencing

## Sheet: B1. Gene ontology_Patient EC
B1. GO Analysis
CELLULAR PROCESSES HUVEC vrs Patient-derived Venous ECs
TermID	Term	Enrichment	logP	Genes in Term	Target Genes in Term	Total Target Genes	Gene Symbols
GO:0072358	cardiovascular system development	1.33166e-07	-15.8317	727	75	882	FOXM1,TMEM100,CCL2,GATA3,DLC1,ERBB2,VASH1,MYH10,ESX1,HEY2,COL5A1,SMO,CPE,CEACAM1,SLIT2,SNAI2,PPARG,TGFA,COL8A2,NCL,RAMP2,NFATC1,WARS,HS6ST1,APOLD1,GATA6,HPSE,CCBE1,CXCL8,PTK2B,SEMA3C,NRG1,E2F8,MYLK2,EPGN,PCSK5,EGR1,ROBO1,COL8A1,ID2,NOTCH2,SEMA3E,COL3A1,HDAC9,PDCD10,NEBL,ITGB8,MMP2,TNFAIP2,ACTA2,SFRP1,CXCL12,MESP1,PDPN,RARB,NOTCH1,GREM1,MSX1,PPARA,SPINT1,PDE3B,FOXC1,C3orf58,ANGPTL4,HOXB3,COX17,INS…
GO:0001525	angiogenesis	4.57148e-06	-12.2957	277	35	882	TMEM100,CCL2,COL8A1,ROBO1,SEMA3E,VASH1,PDCD10,MMP2,TNFAIP2,CXCL12,SLIT2,CEACAM1,NOTCH1,GREM1,TGFA,COL8A2,RAMP2,NCL,PDE3B,ANGPTL4,HOXB3,WARS,HS6ST1,APOLD1,HPSE,GPR124,CCBE1,CXCL8,PTK2B,NFATC4,ITGAV,CD34,E2F8,PIK3CG,EPGN
GO:0016477	cell migration	1.64562e-05	-11.0148	659	63	882	CTHRC1,LURAP1,LGALS3,SEMA4C,CCL2,ROBO1,SLIT3,GATA3,CXCL2,LYN,DNER,MERTK,MYH10,PLAT,ICAM1,SIRPA,CD58,DDIT4,LHX6,COL5A1,SMO,MESP1,CXCL12,LRRC16A,CEACAM1,SLIT2,SNAI2,FAP,NOTCH1,GREM1,PODXL2,SELE,ASPM,CXCL6,MMP1,SORBS2,FOXC1,LCP1,PTPRF,DCLK1,GPR124,PTK7,THBS4,VCAN,NDNF,PEX2,HOXA5,CXCL8,NDN,KITLG,CXCL1,PTK2B,SEMA3C,HGF,NRG1,ITGAV,SCARB1,CD34,F2RL1,SEMA3A,PIK3CG,THBD,ZEB2
GO:0030198	extracellular matrix organization	1.97828e-05	-10.8307	358	40	882	DCN,MPZL3,LGALS3,LEPREL1,COL8A1,DDR2,TNXB,SDC2,COL3A1,ICAM1,COL6A3,LAMA3,EMILIN1,ITGB8,ABI3BP,MMP2,COL5A1,BGN,ITGA10,SULF2,GREM1,LEPREL2,COL8A2,MMP1,SDC3,VWA1,RAMP2,SPINT1,CTSK,FOXC1,NID2,ITGAE,POSTN,LTBP4,NDNF,VCAN,TNFRSF11B,ITGAV,ITGB4,MMP16
GO:0042127	regulation of cell proliferation	2.04809e-05	-10.796	1301	107	882	GAL,FOXM1,CCL2,LEPREL1,ROMO1,DDR2,SLIT3,DLC1,GATA3,ERBB2,CD274,VASH1,IL1A,LYN,GLUL,BLOC1S2,HEY2,PDE1A,AKR1C2,SRPX,PMAIP1,NOG,SMO,HYAL1,RTKN2,TLR4,ETV4,DNMT1,SLIT2,S100A13,SNAI2,PPARG,TES,TGFA,IRF6,CRLF1,ASPH,WARS,TWIST2,HPSE,GATA6,PEX2,CXCL8,PTK2B,CXCL1,KITLG,NRG1,TNFSF4,TNFSF18,EPGN,HMGA2,CDKN2B,CTHRC1,CGRRF1,EGR1,LGALS3,DHCR24,MED31,ROBO1,ID2,MXD4,NOTCH2,BMP6,NDUFS4,RAC2,PDCD10,IGF1R,ALDH3A1,TS…
GO:0002040	sprouting angiogenesis	9.46282e-05	-9.26555	43	10	882	GREM1,NOTCH1,GPR124,CCBE1,ROBO1,PTK2B,RAMP2,SEMA3E,E2F8,SLIT2
GO:0007155	cell adhesion	0.000219833	-8.42264	822	70	882	MPZL3,BCAM,CCL2,TNXB,DDR2,DLC1,MYH10,PCDH7,LAMA3,EMILIN1,SRPX,COL5A1,ITGA10,SLIT2,CEACAM1,MPZL2,SELE,COL8A2,CDH12,ALCAM,NID2,LMLN,HSPB11,ITGAE,HPSE,PTK7,PTK2B,KITLG,SCARB1,BMPR1B,CDH4,CLDN1,NEDD9,COL8A1,CPXM1,ROBO1,THBS3,APBA1,MERTK,COL3A1,LGALS3BP,SIRPA,COL6A3,ICAM1,CD58,PRKCE,ITGB8,CPXM2,CXCL12,PDPN,PVRL4,PODXL2,THBS2,SORBS2,OMD,PTPRF,CNTNAP1,FAT4,POSTN,PCDHGA11,MMRN1,THBS4,VCAN,CGREF1,PKP1,ITG…
GO:0001666	response to hypoxia	0.000291752	-8.1396	236	27	882	PAK1,NOTCH1,EGR1,RBX1,CRYAB,CCL2,PPARA,SDC2,CBS,TCEB1,RAMP2,PLAT,ANGPTL4,ICAM1,DDIT4,PRKCE,APOLD1,GATA6,PMAIP1,RPS27A,MMP2,ALDH3A1,E2F1,PTK2B,SFRP1,CXCL12,CASP1
GO:0001816	cytokine production	0.00235001	-6.05334	107	14	882	NOTCH1,GATA3,NOTCH2,BATF,TNFSF4,TLR4,F2RL1,MR1,CASP1,LYN,S100A13,PIK3CG,FABP4,PCSK5
GO:2000352	negative regulation of endothelial cell apoptotic process	0.00315288	-5.75944	19	5	882	GATA3,RAMP2,TNFAIP3,ANGPTL4,ICAM1
GO:0043534	blood vessel endothelial cell migration	0.00758945	-4.881	23	5	882	PTK2B,GREM1,SCARB1,SLIT2,ROBO1
GO:0010574	regulation of vascular endothelial growth factor production	0.0129331	-4.34797	26	5	882	HPSE,IL1A,CCL2,CCBE1,SULF2
GO:0003158	endothelium development	0.01494	-4.20371	70	9	882	HEY2,NOTCH1,SLC40A1,TMEM100,NRG1,MESP1,CD34,F2RL1,ICAM1
GO:0033628	regulation of cell adhesion mediated by integrin	0.0424588	-3.15922	35	5	882	LYN,PDE3B,RAC3,PIK3CG,SNAI2

## Sheet: C1. DEGs_Patient EC
C1. Differentially regulated genes in patient-derived venous ECs and control cell lines
Symbol	HsaVEC vs. VascAN logFC	HsaVEC vs. VascAN PValue	HsaVEC vs. VascAN FDR	HUVEC vs. VascAN logFC	HUVEC vs. VascAN PValue	HUVEC vs. VascAN FDR
A4GALT	1.20185	0.00181184	0.13928	2.18317	1.76265e-05	0.00117234
ABCA3	-1.96702	0.00101512	0.0942966	-2.67085	2.09997e-06	0.000192325
ABCB1	3.12375	2.88642e-05	0.00674217	3.45472	8.51898e-08	1.285e-05
ABI3BP	2.30704	1.02585e-06	0.000433001	2.82155	1.33458e-09	3.02911e-07
ACTA2	1.06821	0.0133867	0.518897	1.72163	6.34308e-05	0.00314332
ACTRT3	-1.95756	0.000804055	0.0809496	-1.52821	0.00639708	0.0914081
ADAMTS6	1.10425	0.00275431	0.189061	1.05633	0.00230094	0.0479292
ADAMTS9	-1.1192	0.00293721	0.197116	-1.69797	1.20742e-05	0.000880281
ADD2	2.44448	0.0402782	0.944631	4.52688	0.000307401	0.0111887
ADRBK2	1.19506	0.00856994	0.393481	1.32553	0.00230366	0.0479651
ALCAM	1.35932	7.10253e-06	0.00229369	1.39973	2.46734e-06	0.000217841
ALOX5AP	1.46516	0.0419827	0.970299	3.14027	0.000405175	0.0138271
ANGPTL4	1.70804	0.00144793	0.120168	1.58832	0.00306138	0.0578357
ANKRD2	-1.93064	0.00651811	0.327389	-2.2488	6.91108e-05	0.00333018
ANKRD36BP2	1.30008	0.0228824	0.705805	4.46262	2.94022e-19	3.21539e-16
ANO4	3.62419	1.53902e-05	0.00420764	5.21624	3.03535e-09	6.28481e-07
APBA1	1.49165	0.000466986	0.0589775	1.9488	2.8061e-06	0.000243726
AREG	1.67679	0.0112927	0.469119	3.73805	8.80436e-07	9.49884e-05
ARHGAP25	1.58715	0.00849463	0.391343	2.56712	6.19434e-05	0.00309833
ARHGEF10L	2.67236	8.89687e-05	0.0167882	-1.10782	0.00393016	0.067709
ART4	-2.09356	0.000232295	0.0357111	-2.06602	0.000222618	0.00878746
ASPH	1.08749	7.91544e-05	0.0152962	1.41774	5.89456e-08	9.30761e-06
ATP6V0E2	-1.37853	0.00249687	0.175907	-1.9105	5.04054e-06	0.000405586
BDKRB2	3.77009	2.34771e-06	0.000911025	2.64864	5.9347e-05	0.00299964
C10orf54	2.47618	7.28154e-08	4.37967e-05	1.89694	2.62469e-07	3.40417e-05
C15orf52	1.48052	0.00432882	0.252491	1.39758	0.00165331	0.0382317
C2orf81	-1.03567	0.00984552	0.431779	-1.46962	4.53731e-05	0.00245863
C5orf46	3.23643	0.000620576	0.0699318	7.05717	1.76852e-06	0.000166858
C6orf141	-1.19493	0.017207	0.608798	4.26588	2.37854e-05	0.00146704
C8orf4	3.25583	3.31476e-05	0.00752357	2.49528	1.63514e-05	0.00110817
CA2	4.40758	0.00451138	0.259526	6.64331	0.000540178	0.0173166
CBS	-1.69202	0.00036673	0.0484788	-2.99492	2.90884e-13	1.84168e-10
CC2D2A	-1.76056	0.000142756	0.0243586	-1.55474	0.000640754	0.0196381
CCDC152	-2.51188	5.01862e-05	0.0106509	-3.20025	1.95404e-09	4.33293e-07
CCDC178	2.37335	0.0118509	0.483071	2.84556	0.0019032	0.0421971
CCDC88C	-1.47244	0.00158962	0.126428	-2.09985	3.27764e-07	4.05433e-05
CCL2	3.619	0.00095154	0.0910262	3.50419	0.00282943	0.0548535
CD14	3.95439	0.00106251	0.0964639	2.97835	0.00210515	0.04516
CD34	1.68829	0.0120116	0.487401	1.96656	0.002655	0.0526256
CD70	3.34316	0.0191973	0.65006	3.95768	0.00156384	0.0367504
CEACAM1	2.82708	0.0308237	0.817555	4.41605	0.000732014	0.0216778
CELF2	-2.14118	4.43401e-07	0.000215511	-2.67436	1.15367e-11	4.51319e-09
CGREF1	-2.16624	0.00678797	0.337421	-3.6165	0.000167951	0.00705189
CH25H	5.47492	2.41063e-05	0.00582888	8.2728	3.04589e-08	5.21573e-06
CLDN1	2.28837	2.21353e-05	0.00546208	5.83992	1.844e-14	1.30484e-11
CLEC2B	2.37128	8.2366e-05	0.0157772	4.34819	1.40696e-09	3.1784e-07
CLEC3B	5.36348	0.00263408	0.18316	3.40753	0.00649717	0.0918986
COL3A1	-1.58455	0.0376108	0.921465	-4.56396	1.76004e-11	6.77518e-09
COL6A3	4.16764	0.00143234	0.119655	4.19097	0.000894862	0.0248752
COL8A1	2.55814	3.58643e-09	3.83493e-06	1.31233	0.00214815	0.0457568
COL8A2	-1.77155	0.000548954	0.0641131	-3.12957	2.17498e-11	8.17622e-09
COLEC12	-2.58195	0.000483048	0.0597759	-3.26999	3.35553e-09	6.75571e-07
CPA4	2.5577	1.68341e-06	0.000680694	3.11551	1.80867e-08	3.19963e-06
CPE	-4.3632	4.96926e-07	0.000236743	-8.00523	6.15614e-49	2.96221e-44
CRADD	1.17172	0.00194658	0.145218	1.50136	6.89098e-05	0.00333018
CRLF1	3.29803	7.87433e-08	4.62069e-05	1.42383	0.0053509	0.0825715
CRYAB	2.85427	0.00106115	0.0964639	4.02895	6.94913e-06	0.000533299
CSF2RB	-1.23837	0.00259341	0.181484	-2.34769	1.88636e-09	4.22176e-07
CST1	-4.1273	9.40617e-05	0.0172401	-3.11937	0.00652653	0.0920288
CTSK	-1.53775	0.00153311	0.123362	-2.16471	1.09936e-05	0.000806387
CXCL12	1.55111	0.00528403	0.287947	3.386	3.42098e-07	4.19205e-05
CXCL8	1.3207	0.023333	0.714663	2.97504	2.818e-07	3.63529e-05
CYGB	4.54555	0.000513158	0.0614233	5.14047	0.000171424	0.00716643
DAW1	-1.83745	0.000146541	0.0247628	-1.73081	3.52417e-05	0.00203231
DCLK1	2.46634	3.45994e-07	0.000171635	6.90227	2.51103e-33	5.0344e-30
DDIT4	1.59851	0.001156	0.101744	1.72773	0.000166732	0.00700683
DDR2	-1.61033	0.000384945	0.0506087	-2.52988	8.13105e-10	1.99617e-07
DLC1	-4.89175	6.63725e-10	9.67791e-07	-5.11677	8.4027e-13	4.87134e-10
DMRTA1	-4.02944	0.000343481	0.0464259	-5.67777	5.08382e-08	8.20884e-06
DNAJC12	-1.42994	0.0217342	0.689838	1.99485	0.00126262	0.0318089
DOC2B	1.69104	0.00391696	0.233678	1.79983	0.00277752	0.0541526
DTNA	-2.45032	8.28026e-06	0.00255419	-3.2243	2.26853e-11	8.39671e-09
E2F5	-2.44113	0.000263759	0.0391781	-3.03983	1.59058e-07	2.1996e-05
ENO2	-1.06452	0.0220462	0.691647	-1.67472	1.57803e-05	0.00107857
EPGN	2.23792	0.0141921	0.537619	4.90543	2.69191e-06	0.00023508
EPN3	8.20677	0.000100944	0.0181239	4.78356	0.000403136	0.0137868
EPSTI1	1.06765	0.0397516	0.944631	1.50315	0.00670071	0.0934527
ERBB2	2.00797	0.0133704	0.518837	-2.14943	2.14853e-06	0.000195062
ESX1	3.26795	7.61742e-07	0.000333213	4.87108	2.31967e-11	8.52046e-09
ETV1	-1.22218	0.0414136	0.961746	-1.64216	0.00520138	0.0809399
EVA1A	1.4176	0.000164557	0.0268923	1.15392	0.000325272	0.0116889
F2RL1	-2.58578	8.52784e-10	1.20689e-06	-2.2268	1.65551e-07	2.28252e-05
FABP4	4.4253	0.00170629	0.133284	5.62843	0.000286228	0.0106765
FAM110D	2.29754	0.0202226	0.664667	4.02236	0.000455252	0.0151597
FAM163A	4.43594	0.00222549	0.161233	4.87472	0.000680039	0.0205154
FAM174B	-1.00332	0.000478789	0.0595749	-1.36214	6.09981e-05	0.00306059
FAM78A	-1.76474	0.000473991	0.0595749	-3.531	1.96845e-16	1.75403e-13
FAS	1.48838	0.000305047	0.0431943	2.80598	1.39704e-10	4.17532e-08
FHOD3	5.42431	0.00191465	0.143727	6.17346	0.00063408	0.0194928
FILIP1L	1.36843	5.49369e-05	0.0114933	1.56078	2.08877e-05	0.00132804
FLVCR2	1.99365	0.00148192	0.120248	4.04829	2.22576e-07	2.98326e-05
FRMD5	-3.71423	1.68537e-08	1.27365e-05	-3.74489	2.20402e-10	6.31268e-08
GABBR2	-4.08712	8.10263e-15	2.59922e-11	-3.31416	3.19267e-07	3.96963e-05
GALNT18	2.27838	0.00280902	0.191723	2.86354	7.70919e-05	0.0036619
GCKR	-2.00039	0.000181815	0.0292589	-1.91063	0.00167421	0.0384167
GGT1	2.04406	0.0148838	0.556038	2.47106	0.00406659	0.069315
GIMAP4	-2.5208	5.07761e-11	9.77297e-08	-3.41059	1.77986e-16	1.61592e-13
GIMAP8	-1.30043	6.58037e-05	0.0134738	-2.2979	1.73064e-15	1.38791e-12
GNAI1	1.19817	0.000489881	0.0598497	1.40872	2.24777e-05	0.00141014
GPR125	-1.47657	0.000537179	0.063198	-2.22331	5.6483e-09	1.10034e-06
GPR143	-1.45559	0.000802918	0.0809496	-2.14815	8.11138e-08	1.23124e-05
GPR162	-1.68918	0.00450322	0.259504	-2.69317	8.86346e-07	9.54121e-05
GRAMD1B	1.69845	0.0469544	1	3.37394	1.86362e-05	0.00121345
GREM1	4.65407	0.0127411	0.503106	8.26502	0.000159063	0.00677327
GSAP	-1.02285	0.0483724	1	1.50255	0.00566918	0.0854131
H19	7.06313	0.0078853	0.375668	5.97919	0.00506091	0.0798167
HID1	-2.40091	5.58992e-05	0.011644	-2.87429	1.53167e-07	2.13626e-05
HIST1H1A	-1.15271	0.0208688	0.673486	-1.82442	4.70323e-05	0.0025256
HIST1H3E	-1.00254	0.0104956	0.450114	-3.28443	2.32353e-19	2.60009e-16
HIST3H2A	-1.3679	0.0215203	0.688048	-1.6045	0.00487438	0.0780247
HIST3H2BB	-1.0712	0.0312196	0.822345	-1.40664	0.00265545	0.0526256
HMGA2	-1.74184	6.11637e-05	0.0125772	-2.28674	5.89971e-08	9.30761e-06
HOXA6	-2.35622	0.0233556	0.714902	-3.65315	3.40453e-05	0.00197373
HPSE	-2.03125	2.26594e-09	2.59601e-06	-1.10776	0.00166978	0.0383689
HTRA3	-1.84003	0.0005975	0.0686179	-2.62456	3.52901e-07	4.30987e-05
HYAL1	1.71415	0.000221126	0.034434	1.33519	0.00236429	0.0490788
ICAM1	1.41598	0.00236744	0.168267	1.8025	0.000187291	0.00765682
ID2	1.12885	0.0242778	0.734255	2.57795	2.99285e-07	3.77979e-05
IFI27	3.72628	1.78227e-17	1.24644e-13	1.05598	0.000643698	0.0196907
IFI44	1.30087	7.39582e-05	0.0146449	1.97721	4.63613e-11	1.62833e-08
IGF1R	-1.59148	0.0180121	0.622102	-2.4108	1.41407e-05	0.00100614
IGF2BP1	-4.7759	2.29152e-10	3.55688e-07	-7.31467	6.3341e-44	1.52392e-39
IGFBP5	5.25405	1.35278e-09	1.71298e-06	6.4371	1.03447e-14	7.54188e-12
IKZF2	2.67082	1.32102e-05	0.00371725	1.83131	0.00111771	0.029325
IL7R	1.18245	0.0104395	0.448505	1.567	0.000146542	0.00632405
INSC	1.6782	0.0297141	0.809151	4.74859	1.54194e-05	0.00106449
IRF6	-2.56515	0.000330448	0.0454632	-3.84349	3.56275e-07	4.3291e-05
ITGB4	-1.42476	2.8461e-06	0.00103666	-2.35457	7.94395e-19	8.33128e-16
ITM2A	1.97238	0.000427688	0.0547327	3.1514	7.36342e-08	1.1248e-05
KIAA1244	-1.92126	3.15958e-06	0.00111789	-2.45102	7.69349e-11	2.55307e-08
KIF21A	-1.46235	0.000506668	0.0611673	-1.35816	0.000963096	0.0262208
KIF26A	-1.84174	0.00331664	0.210382	-3.55212	8.99248e-12	3.70879e-09
KLHL23	-1.54221	0.00842016	0.391343	-2.04759	0.000110592	0.00495424
KRT6A	1.55735	0.0334312	0.854207	3.37949	5.82211e-07	6.64253e-05
KRT6B	1.5954	0.0287589	0.798675	3.37595	3.18017e-06	0.000270359
KRT6C	1.58802	0.0294161	0.80462	3.36856	3.11959e-06	0.000265785
KRT7	1.92079	0.00110241	0.0991749	2.91472	3.9298e-06	0.000328288
KRT76	1.54789	0.0359757	0.896933	3.37045	6.99612e-07	7.75667e-05
KRT81	4.60168	0.00027123	0.0400339	5.40736	1.1715e-05	0.000856692
KRT83	3.99487	0.0127036	0.502276	3.08623	0.00499219	0.0790179
KRT86	3.64435	0.00662432	0.33203	3.50239	0.00224718	0.0470948
LAMA3	-1.60448	7.34216e-06	0.00233967	-1.56772	5.19512e-06	0.000416631
LAYN	1.70386	0.0192865	0.651236	5.39939	1.33785e-08	2.47628e-06
LCP1	1.92617	0.0188404	0.641134	3.37976	0.000285135	0.010644
LFNG	1.69622	0.00391907	0.233678	1.78896	0.00252208	0.0508837
LIN7A	-3.58451	0.000223403	0.034565	-6.46635	9.89311e-20	1.16106e-16
LINC00961	1.26927	0.000697593	0.0740614	1.18572	0.00133409	0.0329368
LOC100130298	6.19916	8.12254e-05	0.0156336	6.5352	2.58712e-05	0.00156872
LOC100506100	1.10286	0.021101	0.678886	1.58853	0.00160925	0.0375163
LOC645166	1.20209	0.0014677	0.120168	1.7502	6.72192e-08	1.03668e-05
LOC647859	-4.02885	0.00067446	0.0730939	-3.65784	0.00689838	0.0950834
LOC654342	1.2596	0.00062907	0.0701758	1.7674	3.03983e-07	3.81908e-05
LONRF3	-2.73022	2.87489e-06	0.00103666	-2.27553	0.000413592	0.0140248
LPL	5.23789	0.000161064	0.0268923	8.79555	1.43358e-06	0.000140777
LRIG1	-1.61198	0.0232135	0.71191	-2.74344	2.01032e-05	0.00128293
LRMP	3.04801	0.00100893	0.0939025	3.77104	1.56103e-05	0.00107152
LRRC38	7.39145	1.51394e-05	0.00418666	6.18523	3.58684e-06	0.000302262
LRRC75A	-1.50114	0.0173342	0.611052	-1.90337	0.00180729	0.0407513
LSP1	1.30791	0.0267128	0.769408	1.58492	0.00467233	0.0758258
LTBP4	1.1422	0.0402839	0.944631	-1.80692	8.46709e-07	9.17611e-05
MALT1	1.21674	7.50898e-05	0.0148081	1.46681	9.83486e-07	0.000101886
MAMDC2	1.63322	0.000630034	0.0701758	4.05839	5.25597e-16	4.5983e-13
MCF2L	3.57845	0.00545351	0.294009	7.0065	0.000231797	0.00901116
MERTK	-2.01825	0.000188437	0.0300238	-1.94902	0.000241443	0.00933903
MLPH	3.50942	0.010524	0.450529	7.42598	2.46508e-06	0.000217841
MME	-3.30947	3.8403e-31	5.08469e-27	-1.8432	2.80651e-05	0.00168174
MMP1	-2.44927	1.22119e-09	1.63225e-06	-2.69385	1.07041e-11	4.25633e-09
MMP16	-1.31512	0.0154144	0.566855	-2.08551	5.68836e-07	6.51696e-05
MMRN1	-2.15676	4.72685e-05	0.0102453	-2.4952	7.74173e-07	8.52441e-05
MNS1	-1.32167	0.0472188	1	-1.48717	0.00691149	0.0951279
MPZL2	2.24991	5.95637e-11	1.04914e-07	2.83249	1.09035e-15	9.04577e-13
MRC1	3.19604	0.00273514	0.188553	8.29493	2.86966e-06	0.000247016
MSMP	-1.57053	0.00905588	0.408389	-1.6958	0.00336933	0.061481
MST4	-2.44384	0.000607669	0.0692887	-2.09319	0.00249717	0.0507152
MSX1	1.32967	0.0175485	0.614096	2.50437	6.30699e-05	0.00313188
NALCN	-2.5531	2.77431e-05	0.00654383	-1.94668	0.00197323	0.0431133
NDNF	5.89709	0.0109671	0.461072	6.2349	0.00518753	0.080912
NEDD4L	1.31452	0.000839319	0.0836157	1.75384	1.47185e-05	0.00103391
NID2	-1.53885	0.000457568	0.0579402	-1.62159	0.000343777	0.0122261
NOG	2.67394	0.0131471	0.51265	4.16417	0.000849524	0.0240173
NOSTRIN	2.03577	0.000236435	0.0360025	4.78367	2.02166e-15	1.59473e-12
NOTCH2	-1.01749	0.0416152	0.963638	-1.4619	0.00263528	0.0523734
NPAS2	-1.64086	0.00543273	0.294009	-1.85291	0.00109538	0.028865
NRG1	-2.16606	0.0018222	0.139397	-3.91416	5.35344e-12	2.25962e-09
NSG1	2.50917	0.00192934	0.14445	5.53155	2.39375e-10	6.77545e-08
NTS	3.88289	0.0254973	0.754538	5.11332	0.00526685	0.0816201
OAF	-1.06505	0.00973338	0.429286	-1.28517	0.000522719	0.016955
OAZ3	1.5672	0.0188799	0.641571	2.22883	0.00156172	0.0367287
OCLN	-1.08948	0.00883361	0.402115	-1.27384	0.00166705	0.0383438
OLAH	2.03262	0.00100728	0.0939025	3.08699	6.40654e-07	7.23639e-05
OMD	6.3252	0.00386531	0.232199	6.64034	0.00172897	0.0392983
OTOF	2.77229	0.0203028	0.665485	5.56416	0.00017544	0.00727115
PARD3B	-1.36084	0.000935364	0.0904501	-1.6793	3.80076e-05	0.00216432
PARD6A	-2.30635	0.00334037	0.210382	-2.98687	0.000235562	0.00914094
PCAT19	-1.02875	0.0107615	0.45642	1.99599	4.51786e-06	0.000369712
PCDH7	-3.27113	1.97627e-11	3.96547e-08	-5.6062	3.21743e-39	3.09633e-35
PDGFD	-1.84479	0.00900712	0.406953	-2.08262	0.00301672	0.057194
PDPN	2.33963	0.00811951	0.381846	4.8035	1.58202e-06	0.000154409
PFN2	-1.33513	0.00549445	0.294889	-1.5502	0.00118178	0.0304101
PHLDB2	1.13506	0.0050719	0.280517	1.18488	0.00238353	0.0492446
PHOSPHO2-KLHL23	-1.3434	0.0294304	0.80462	-1.74591	0.00198211	0.0432075
PIK3CG	-1.12575	0.00968156	0.427392	-1.10741	0.00597666	0.0879454
PIK3R3	1.88614	1.89901e-06	0.000755178	2.17735	2.76611e-08	4.7706e-06
PKP1	4.57003	3.56112e-09	3.83493e-06	6.3423	6.06926e-13	3.69672e-10
PLA1A	2.36983	0.000957099	0.0912252	3.80616	9.59084e-07	0.000100983
PLCE1-AS1	3.69617	0.0126834	0.502276	5.17686	0.000444108	0.0148503
PLCXD3	1.95297	0.000916462	0.0894489	4.1272	1.65253e-08	2.96703e-06
PLEKHA2	1.12766	0.0029954	0.199775	1.92292	5.28773e-08	8.39719e-06
POSTN	2.68458	1.75772e-08	1.27365e-05	6.99314	1.53656e-38	1.05623e-34
PPARA	1.01349	0.00809763	0.381302	1.11477	0.00210354	0.04516
PPARG	1.23293	0.00100032	0.0936085	5.96402	5.9531e-27	9.87763e-24
PPP1R3C	1.54991	0.0101906	0.44017	1.96729	8.39228e-05	0.00392763
PRKAR2B	-3.0518	3.74348e-13	1.1258e-09	-2.80138	1.93178e-12	9.68265e-10
PRPH	1.87799	0.00751066	0.361398	3.06621	1.48858e-06	0.000145881
PRSS12	2.70358	0.00125618	0.107938	7.58015	1.5043e-07	2.11032e-05
PTGS1	-1.50843	1.77304e-05	0.00460008	-3.683	9.09036e-35	2.21354e-31
PTK2B	1.47987	0.00143226	0.119655	2.28932	1.38075e-06	0.000136425
RAET1G	1.24886	0.0285345	0.797342	1.45333	0.00403936	0.0690711
RAP1GAP2	2.4994	0.00160104	0.126929	3.48691	5.84758e-05	0.00297819
REEP2	-2.10548	9.06387e-05	0.0168392	-2.30154	6.61798e-06	0.000512792
RENBP	-2.23533	0.00131894	0.112526	-1.98321	0.00266067	0.0526424
RGS11	-1.20561	0.0218916	0.689838	-1.76316	4.69901e-05	0.0025256
RGS7	2.89635	0.000336984	0.0459349	3.6849	1.45954e-05	0.00102826
RNLS	-2.55585	4.24197e-05	0.00943701	-1.92079	0.00173577	0.039397
RUNDC3B	1.6735	0.014199	0.537619	2.45463	0.000279975	0.0105166
RUNX1T1	-1.3923	0.00317049	0.206159	-1.90432	1.72724e-05	0.00115754
S100A4	2.33136	0.0167046	0.5967	4.05984	0.000164547	0.00693315
SCARA3	-1.00467	0.0149463	0.557077	-1.86873	2.60126e-07	3.39207e-05
SCEL	3.86085	0.00348645	0.216775	6.04144	0.000300555	0.0110398
SDR42E1	-1.49773	0.0122308	0.492074	4.30891	3.87529e-05	0.00219895
SELE	6.17827	0.000980422	0.0927163	8.89575	3.72906e-05	0.00213106
SEMA3C	3.47952	0.000421382	0.054214	3.97144	7.21328e-05	0.0034605
SEMA4C	-1.24254	0.021621	0.689838	-2.15446	1.24736e-05	0.000905286
SERPINB2	-3.01546	7.47106e-12	1.89206e-08	-2.50524	9.27341e-05	0.00423477
SFRP1	-1.81471	0.0165453	0.595014	-2.83699	4.25668e-05	0.002357
SFTA1P	2.57459	0.0149704	0.557113	3.92796	0.000420919	0.0142132
SHROOM3	-2.74224	1.02074e-06	0.000433001	-3.42289	6.46821e-13	3.84244e-10
SLAIN1	-2.41422	9.1401e-05	0.0169155	-2.89774	1.02178e-06	0.000105104
SLC16A4	-1.25131	0.0449872	1	-2.49803	8.2017e-07	8.92871e-05
SLC1A4	-1.14254	0.0115873	0.477413	-1.94541	4.44284e-06	0.000365437
SLC2A13	-1.49144	0.02033	0.665921	-1.6739	0.00446377	0.0736583
SLC39A8	-1.29629	0.00220952	0.160844	-1.25102	0.00278484	0.0542735
SLC40A1	-1.51443	0.00179405	0.138343	-1.60355	0.000816491	0.0233717
SNAI2	2.48262	0.00509123	0.281263	2.84036	0.000271447	0.0102604
SNAPC1	1.61686	0.00024137	0.036638	1.26077	0.00566959	0.0854131
SOCS2	1.48396	0.000283816	0.0411933	3.14149	1.08498e-10	3.38659e-08
SOHLH2	2.4326	0.0452058	1	-3.87233	5.35448e-05	0.00277936
SORBS2	1.40469	1.58539e-05	0.00428573	2.58392	6.40309e-13	3.84244e-10
SPARCL1	5.51556	0.00723738	0.351057	7.84971	0.000904825	0.0250197
SPINT1	-2.38047	0.000146669	0.0247628	-3.0898	2.35783e-07	3.13409e-05
ST8SIA6	-2.37092	0.000617929	0.0699318	-2.27453	0.00555308	0.0843248
SULT1E1	1.58562	0.0293272	0.80462	-3.23289	1.1751e-14	8.43933e-12
TAGLN	2.18324	9.95737e-05	0.0180117	1.38807	0.00202452	0.0439205
TCEAL7	-3.16827	2.89589e-08	1.83348e-05	-2.92255	8.96449e-07	9.60698e-05
TEKT4P2	-1.02397	0.0257884	0.759416	4.30801	7.53637e-11	2.5183e-08
TGFA	4.36035	5.04677e-05	0.0106509	6.99794	8.4021e-10	2.04188e-07
THBS4	4.99129	0.0178407	0.617596	7.02738	0.00328302	0.0605258
TIMP4	1.5942	0.0153212	0.564059	3.88516	1.94969e-08	3.43645e-06
TLR4	1.29257	0.00809865	0.381302	2.05787	8.65898e-06	0.000655115
TMEM100	2.71617	2.30897e-07	0.000119466	4.2088	8.61626e-15	6.37842e-12
TMEM217	1.80678	0.00318258	0.206666	2.26932	0.0006686	0.0202699
TMEM56	1.61872	0.0189816	0.644115	2.32213	0.000208151	0.0083398
TNFAIP3	1.43975	0.000339632	0.046165	1.65126	0.000219318	0.00867891
TNFRSF11B	2.39143	0.000193398	0.0307126	3.57509	1.33675e-06	0.000132896
TNFSF4	-2.36882	0.000186154	0.0297587	-2.52335	6.72475e-05	0.0032652
TNXB	1.95809	0.0316438	0.825724	2.86085	0.000969728	0.0263475
TPD52	-2.73242	6.80322e-05	0.0137356	-2.6893	4.88345e-05	0.0025905
TRIML2	3.85499	6.92233e-12	1.89206e-08	4.49075	5.29948e-13	3.31169e-10
TRO	-1.60774	0.000996395	0.0936085	-1.98434	3.90473e-06	0.000326762
TRPC4	-4.0165	1.56204e-07	8.63934e-05	-3.61261	0.00173358	0.039366
TRPM2	2.25396	0.00319311	0.206792	5.30929	1.00253e-07	1.45739e-05
TSPAN2	3.00826	2.85239e-06	0.00103666	1.38988	0.00518686	0.080912
TSPAN8	-6.22644	1.95774e-05	0.00495803	-8.3066	1.91654e-13	1.24622e-10
TTC39C	-1.03204	0.0104859	0.450099	-1.19633	0.00149754	0.0356903
TWIST2	-6.18034	1.64393e-07	8.98894e-05	-6.57155	9.37903e-08	1.37591e-05
UGCG	1.03103	0.0105663	0.451366	1.3725	0.000498924	0.0163092
ULBP1	1.24118	0.0201026	0.662986	1.45229	0.00471938	0.0762805
ULBP2	1.23047	0.00134222	0.114026	1.75224	9.62788e-06	0.000716034
VAMP8	-1.99274	7.0831e-05	0.0141421	-1.92795	3.89842e-05	0.00220564
VCAN	1.80567	0.00233697	0.166429	3.51788	4.94352e-07	5.7457e-05
VWA1	4.45076	8.75427e-07	0.000379494	3.75566	5.15393e-06	0.000414018
WARS	1.31727	0.00189348	0.14314	1.30156	0.00140972	0.0343458
WNK4	2.81106	5.23993e-07	0.000242437	6.9719	6.06298e-18	6.07789e-15
WSCD1	-2.31203	5.70684e-09	5.64612e-06	-2.74299	1.81901e-12	9.21339e-10
XIRP2	-6.7806	2.14637e-09	2.519e-06	-6.80676	8.60257e-08	1.28953e-05
ZNF366	1.09679	0.0397524	0.944631	2.26436	4.16158e-05	0.00231232
ZNF385D	2.12922	0.0139232	0.530397	4.38775	1.51651e-05	0.00105172
ZSCAN31	1.37497	0.0334665	0.854293	1.70232	0.00151737	0.0359846
SEPT2	-0.654278	0.0198339	0.657731	-1.24092	2.41599e-06	0.000214488
SEPT15	0.179702	0.680184	1	1.14457	0.00298352	0.056901
A1BG	1.10596	0.0785997	1	2.93418	3.12084e-06	0.000265785
AASS	-0.750896	0.0294004	0.80462	-1.69795	1.33803e-08	2.47628e-06
ABCA2	-0.32879	0.405698	1	-1.29585	0.000312922	0.0113639
ABCA8	-4.55365	5.22224e-06	0.00172181	-6.34235	1.03287e-11	4.14163e-09
ABCG2	-0.0545744	0.923231	1	1.54143	0.000984613	0.0266766
ACOT13	0.348364	0.270625	1	1.08055	0.000141574	0.00612064
ACOX2	-1.27359	0.0755352	1	-2.09008	0.0024824	0.0506781
ACSL5	0.641064	0.0168113	0.599203	2.88037	2.94719e-23	4.17097e-20
ACTR5	0.243751	0.715226	1	1.72662	0.0022907	0.0477367
ACVR1B	-0.353184	0.327913	1	-1.13946	4.43024e-05	0.00241421
ADAL	0.637158	0.141921	1	1.30936	0.00291517	0.0559076
ADAM32	0.266238	0.644414	1	1.90296	0.000993496	0.0268568
ADAMTSL1	0.521124	0.106502	1	1.07592	0.00119443	0.0306198
ADRB1	0.912926	0.215412	1	2.38818	0.0010326	0.0276036
AIPL1	1.04302	0.0704665	1	2.57356	4.40115e-05	0.00240774
AK5	0.988137	0.266478	1	2.55184	0.00725496	0.0980327
AKR1C1	-0.274046	0.553517	1	2.2389	1.0909e-10	3.38659e-08
AKR1C2	-0.287641	0.502345	1	2.27705	3.56405e-12	1.55905e-09
AKR1C3	-0.469301	0.377072	1	2.44874	7.68549e-08	1.17029e-05
AKR1C4	-0.337882	0.535839	1	2.23521	5.0064e-05	0.00263564
ALDH1A1	-0.501627	0.137838	1	-1.34226	2.32473e-07	3.09865e-05
ALDH3A1	-0.0612559	0.882573	1	-2.32851	6.15546e-06	0.000483968
ALG13	0.411012	0.304114	1	1.20836	0.00246992	0.050509
ALG5	0.137755	0.692365	1	1.02381	0.000559766	0.0178376
ANAPC16	0.0640239	0.882221	1	1.13652	0.000727688	0.0215875
ANKRD30B	-0.101783	0.763527	1	1.82694	0.000152296	0.00653134
ANKRD30BP2	0.00928354	0.988751	1	2.0781	8.4306e-09	1.63574e-06
ANKS6	-0.754675	0.026158	0.765176	-1.13409	5.20304e-05	0.00271835
ANTXR2	-0.751645	0.00485182	0.27115	-1.05625	9.83526e-05	0.00445625
ANXA3	0.850897	0.0608824	1	2.21171	5.31972e-07	6.13848e-05
AOX1	-0.501688	0.169514	1	2.63133	1.5138e-07	2.11748e-05
AP4S1	0.183659	0.639654	1	1.19474	0.00646878	0.0917563
APOLD1	0.213905	0.469172	1	1.17366	0.000170313	0.00713239
AR	-3.82226	1.42255e-11	3.11138e-08	-4.47936	1.3062e-16	1.20869e-13
ARHGAP11A	-0.589687	0.0809367	1	-1.11	0.000116154	0.0051703
ARHGAP11B	-0.85914	0.0161313	0.585646	-1.09946	0.00102004	0.0273438
ARHGAP26	0.27621	0.370564	1	1.35223	1.90468e-05	0.00123517
ARHGAP4	-0.952427	0.0245054	0.739745	-1.98613	6.4632e-08	1.00973e-05
ARHGEF25	0.717985	0.708963	1	-2.91176	1.88365e-05	0.00122318
ARHGEF37	0.866809	0.143493	1	1.67447	0.00424828	0.0714254
ARL4D	-0.262613	0.433292	1	-1.179	0.00102567	0.0274642
ARPC5	0.115174	0.792736	1	1.03741	0.0066007	0.0925508
ASAH1	-0.317356	0.361043	1	1.5509	1.5722e-05	0.00107686
ASF1B	-0.310363	0.465013	1	-1.09415	0.0016628	0.038324
ASPM	-0.524511	0.191064	1	-1.26157	0.000177385	0.00732653
ATP2B1	-0.706301	0.0343432	0.867923	-1.07766	0.000317421	0.0114926
ATP5E	0.367549	0.467007	1	1.56417	0.00052727	0.0170735
ATP5EP2	0.845369	0.168651	1	1.97942	0.000567696	0.0180425
ATP5L2	0.407515	0.359955	1	1.132	0.00498229	0.0789391
ATP5O	0.265893	0.493312	1	1.17648	0.000590229	0.0184539
ATP6V0E1	0.276343	0.367936	1	1.12074	4.40337e-05	0.00240774
ATP6V1G1	-0.0216263	0.947568	1	1.17067	0.00149298	0.0356447
ATP8B1	0.766336	0.0282429	0.793923	1.25891	0.000553026	0.0176579
AURKB	-0.574247	0.168731	1	-1.20226	0.00038849	0.0134099
B2M	0.204623	0.660299	1	1.84314	1.18971e-06	0.000120519
B4GALNT4	-1.29018	0.497113	1	-4.42967	6.42885e-06	0.000503817
BAG2	0.341634	0.412612	1	1.52478	0.000142193	0.00614187
BATF	0.114697	1	1	7.09787	0.000335971	0.0120285
BCAM	-0.305171	0.40505	1	-1.35293	5.34876e-05	0.00277936
BCL7A	-0.623791	0.142518	1	-1.36912	0.000552842	0.0176579
BCYRN1	0.895286	0.028838	0.798695	1.12325	0.00237141	0.04916
BGN	-0.402808	0.34316	1	-1.92696	3.76573e-07	4.51869e-05
BIN1	-0.320198	0.237449	1	-1.02979	6.30171e-05	0.00313188
BIRC3	1.43988	0.0708727	1	2.44063	0.0032685	0.0604201
BLOC1S2	0.109287	0.774038	1	1.06444	0.000959805	0.0261517
BMP6	-0.224974	0.461101	1	-1.2575	1.2693e-05	0.000919824
BMPR1B	-4.09344	5.15303e-07	0.000240731	-4.26605	1.22483e-08	2.31149e-06
BOLA3	0.637829	0.0538853	1	1.02093	0.000936969	0.0257217
BTBD11	0.531766	0.275347	1	2.96625	1.97448e-05	0.00126433
C10orf32	0.0309035	0.923648	1	1.03115	0.00168837	0.0385943
C14orf132	0.385867	0.540827	1	-1.33483	0.0034918	0.0627168
C14orf142	0.28598	0.537945	1	1.45952	0.00147067	0.0352946
C14orf2	0.175808	0.692218	1	1.0696	0.00431081	0.0720167
C18orf32	0.318468	0.488538	1	1.23147	0.00205401	0.0444005
C21orf58	-0.661079	0.104741	1	-1.07365	0.00438132	0.0726872
C3orf55	-0.0300185	1	1	1.778	0.000349465	0.0124009
C3orf58	-0.514533	0.122702	1	-1.06282	0.000821039	0.0234461
C4orf33	0.429856	0.353896	1	1.18602	0.00550864	0.0841208
C5orf28	0.23671	0.506923	1	1.18104	0.000819399	0.0234271
C8orf59	0.351984	0.437544	1	1.50748	0.000744841	0.0219744
C9orf47	-0.124537	0.798634	1	-1.49868	0.000997383	0.0269316
CA8	-3.99048	0.000266945	0.0395227	-5.98316	8.73676e-08	1.29719e-05
CABLES2	-0.269695	0.455716	1	-1.19022	0.00379734	0.066251
CALM2	0.484419	0.316446	1	1.36189	0.00345064	0.0623265
CAND2	-0.401199	0.315938	1	-1.48041	4.01388e-05	0.00224321
CASP1	0.459879	0.262303	1	1.2805	0.00148821	0.0356267
CCBE1	0.0769551	0.768159	1	2.50823	2.81967e-09	5.92474e-07
CCDC53	0.452065	0.11712	1	1.14542	9.15359e-05	0.00419932
CCIN	0.695915	0.17505	1	1.2562	0.00402452	0.0688907
CCNA1	0.441529	0.532735	1	2.57103	0.00360436	0.0642461
CCNF	-0.245357	0.467242	1	-1.04143	0.00032151	0.0115949
CCRL2	0.115619	0.821653	1	1.06358	0.00511449	0.0803721
CD163L1	-0.138352	0.854909	1	1.86441	0.00298934	0.0569109
CD200	-0.217608	0.834354	1	-3.02863	0.00073336	0.0216889
CD274	0.524059	0.0759946	1	1.29698	5.68092e-06	0.000450337
CD58	0.318881	0.495177	1	1.45925	0.00185081	0.0413452
CD74	-1.39163	0.0615482	1	-2.35111	0.000127789	0.00559354
CD82	0.298549	0.389151	1	1.01271	0.00249832	0.0507152
CDCA7L	-0.950401	0.00373097	0.226675	-1.15821	0.00022071	0.00871939
CDH12	-1.64328	0.32853	1	-5.80356	1.89022e-07	2.58391e-05
CDH4	1.66687	0.0785118	1	3.06875	0.00299346	0.0569326
CDIP1	0.374085	0.462671	1	-1.13767	0.00538745	0.0828222
CDK5RAP2	-0.386916	0.277862	1	-1.05441	0.000460073	0.0152569
CDKN2A	-0.238177	0.618288	1	4.81694	7.91811e-12	3.31307e-09
CDKN2AIPNL	0.415837	0.244275	1	1.02329	0.00249746	0.0507152
CDKN2B	0.360596	0.541024	1	1.75404	0.00255865	0.0512775
CENPF	-0.652555	0.0864809	1	-1.20523	0.000131445	0.00573199
CEP170P1	-0.619325	0.0697557	1	-1.04444	0.000556228	0.0177484
CETP	0.597739	0.299507	1	2.77051	4.6103e-06	0.000375361
CFL2	0.173719	0.672187	1	1.08221	0.0030225	0.0572812
CGNL1	-0.235635	0.526209	1	-1.36389	1.24055e-05	0.000901704
CGRRF1	0.161823	0.68807	1	1.11808	0.00237555	0.0491635
CHAC2	0.294472	0.500918	1	1.3748	0.00333946	0.0611912
CHD3	-0.0543175	0.852222	1	-1.02929	0.00107751	0.0285191
CHTF18	-0.515764	0.218859	1	-1.28128	9.03211e-05	0.0041749
CHURC1	0.283608	0.505632	1	1.10899	0.00628866	0.0904627
CIT	-0.383814	0.321559	1	-1.08171	0.000766832	0.022458
CLCN4	-0.395501	0.251154	1	-1.19108	0.00031616	0.0114642
CLEC1A	-0.618391	0.155429	1	-1.06662	0.00721746	0.0976631
CLEC4GP1	-0.639159	0.250005	1	-1.54597	0.000369617	0.0128972
CMC1	0.306453	0.407964	1	1.06434	0.00461672	0.0753892
CNTNAP1	-0.0438323	0.87016	1	1.45854	0.000371737	0.0129524
COA6	0.332773	0.419576	1	1.10582	0.00576087	0.0861677
COL5A1	0.274981	0.556308	1	-1.37579	0.00241147	0.0495877
COMMD1	0.276866	0.453182	1	1.22419	0.000297346	0.0109554
COMMD10	0.25419	0.567226	1	1.22983	0.00381144	0.0664249
COMMD3	0.154562	0.680333	1	1.09743	0.00444909	0.0734757
COMMD6	0.304569	0.578133	1	1.73502	0.000287352	0.0107101
COMMD8	0.277163	0.509833	1	1.43869	0.000301721	0.0110741
COQ10B	-0.0619054	0.868246	1	1.01314	0.00115984	0.0301508
COX14	0.212486	0.647952	1	1.39019	0.000573339	0.0181104
COX17	0.640899	0.061615	1	1.04105	0.00119109	0.0305668
COX5B	0.176995	0.632376	1	1.11768	0.000414438	0.0140426
COX6C	0.194214	0.626392	1	1.06139	0.00198605	0.0432615
COX7A1	0.334732	0.46623	1	1.47761	7.51303e-05	0.00358287
COX7A2	0.398796	0.351429	1	1.2998	0.000574127	0.0181104
COX7B	0.42477	0.402171	1	1.68482	0.000219174	0.00867891
CPNE7	0.901095	0.118342	1	4.8206	3.80693e-11	1.3682e-08
CPT1C	-0.871237	0.0347386	0.876535	-1.36343	5.06882e-05	0.00265978
CPXM1	-3.71344	0.0500658	1	-7.0775	7.43251e-10	1.86269e-07
CPXM2	-1.47868	0.0170799	0.60564	-3.52773	4.65541e-10	1.23082e-07
CREM	0.585008	0.235423	1	1.59501	0.0012197	0.0310856
CRISPLD1	-1.65821	0.0949721	1	-3.04704	0.000311495	0.0113206
CRNDE	-0.408344	0.386402	1	1.36175	0.00251206	0.0508165
CROCC	-0.631075	0.160371	1	-1.00848	0.00724358	0.0979613
CROT	0.329907	0.32194	1	1.00225	0.000373997	0.0129935
CTAG1A	0	1	1	-6.083	0.00183832	0.0411698
CTAG1B	0	1	1	-6.083	0.00183746	0.0411698
CTAG2	0	1	1	-6.12698	0.00163255	0.0378579
CTHRC1	-0.666972	0.0771888	1	1.56381	6.51571e-05	0.00320275
CTSH	-0.8073	0.0121633	0.491002	2.50781	6.58188e-07	7.3997e-05
CTXN1	-0.230402	0.908093	1	-2.23073	0.00308031	0.0580566
CXCL1	0.724525	0.0378861	0.922074	2.30497	1.33935e-10	4.0304e-08
CXCL2	0.74666	0.138544	1	1.49375	0.00438779	0.0727287
CXCL6	0.585111	0.325439	1	1.84631	0.000612172	0.0189309
CYB561	-0.536884	0.135908	1	-1.18251	0.000694246	0.0208525
CYB5R4	0.32594	0.325594	1	1.03087	0.00288165	0.0555622
CYTL1	-0.656163	0.0272266	0.777085	2.88898	1.47446e-08	2.66722e-06
DBNDD2	-0.820531	0.215273	1	-2.02376	0.000608142	0.0188184
DCAF12L1	-2.58191	0.297634	1	-6.99061	1.27215e-08	2.38185e-06
DCN	0.341985	1	1	-5.03108	1.00259e-10	3.21618e-08
DDO	1.89224	0.111376	1	5.12844	0.000303577	0.0110859
DDX19A	0.0596216	0.912728	1	1.03265	0.00716181	0.0971833
DDX58	0.525259	0.165139	1	1.03692	0.00375333	0.0659856
DENND2C	1.6317	0.0603162	1	2.18097	0.00292958	0.0560944
DGKD	-0.25934	0.507472	1	-1.07488	0.00183655	0.0411698
DHCR24	-0.793922	0.030509	0.814462	-1.61549	1.63093e-05	0.00110687
DHCR7	0.0964594	0.870348	1	-1.18053	0.00585404	0.0871862
DHRS12	0.829298	0.0738218	1	1.83276	0.000126941	0.00556316
DIO2	1.09112	0.162812	1	3.25166	0.000199447	0.00806471
DMPK	-0.710868	0.125369	1	-1.36756	0.00309922	0.0582537
DNAJC15	0.550155	0.173717	1	1.15212	0.00166223	0.038324
DNAJC19	0.200468	0.615608	1	1.10662	0.00221127	0.0466112
DNAJC25-GNG10	0.413581	0.297938	1	1.4482	8.09833e-05	0.00383162
DNALI1	-0.65347	0.237894	1	-1.32024	0.00397433	0.0682501
DNASE1L3	1.15726	0.227842	1	3.47968	7.56171e-05	0.00359896
DNER	0.508831	0.70035	1	3.95051	0.00167755	0.0384383
DNMT1	-0.482939	0.175272	1	-1.06461	0.000369035	0.0128956
DNMT3A	-0.380865	0.280589	1	-1.02436	0.000760191	0.022315
DNMT3B	-0.537056	0.232093	1	-1.1154	0.00292065	0.0559499
DOCK5	-0.503754	0.152181	1	1.38955	0.00299092	0.0569109
DOK4	-0.786576	0.0250197	0.747298	-1.38585	1.29412e-05	0.000936395
DPH6	0.369643	0.348233	1	1.19698	0.00175074	0.0396621
DPY30	0.300921	0.455166	1	1.13457	0.00254806	0.051193
DPYSL3	-0.492909	0.10831	1	-1.20072	1.53165e-05	0.0010589
DTX3	1.14942	0.0956703	1	-1.75455	8.61167e-05	0.00400751
DUXAP10	0.0403957	0.967699	1	5.83513	1.69989e-05	0.00114399
DUXAP8	-0.0619302	0.847311	1	5.75646	4.73426e-05	0.00253396
DYNLT1	0.685281	0.0996804	1	1.28344	0.00157895	0.0369712
DYSF	-0.0180412	0.948191	1	1.44898	1.29765e-05	0.000937545
E2F1	-0.665307	0.147634	1	-1.23022	0.00289076	0.0556167
E2F8	-1.14794	0.0555074	1	-2.00341	6.76327e-05	0.00327736
ECHDC2	-0.48221	0.358172	1	1.85041	0.00217552	0.0461152
EGR1	-0.944802	0.204843	1	-2.82493	8.96727e-05	0.00414891
EHD3	-0.257457	0.604336	1	-1.61138	0.000533338	0.017166
ELOVL6	-0.584937	0.120074	1	-1.08876	0.00190386	0.0421971
EMCN	0.411821	0.278173	1	1.70356	2.85751e-07	3.66556e-05
EMILIN1	-0.335169	0.636505	1	-2.4116	0.00037327	0.012987
ENPP4	-1.04759	0.137807	1	-1.8368	0.00576503	0.0862031
ESPN	0.678102	0.147848	1	1.80153	0.000624601	0.0192657
ETV4	-0.835317	0.121868	1	-1.44726	0.00157029	0.0368223
EVC2	-0.916841	0.0598041	1	-1.3127	0.00374956	0.0659721
F2RL2	-0.900952	0.0989606	1	-1.62826	0.00232236	0.0483337
FAM101A	1.08481	0.296671	1	-2.63798	0.0011328	0.0296241
FAM103A1	0.3168	0.411506	1	1.03893	0.00405364	0.0691922
FAM107A	0.144023	0.80163	1	1.35359	0.00327313	0.0604497
FAM124A	-0.060669	0.889107	1	-1.18938	0.00453242	0.0744584
FAM153C	0.90459	0.0884972	1	1.93969	0.000441569	0.0147963
FAM167B	1.34039	0.071622	1	2.58426	0.00107468	0.0284755
FAM198B	-0.158236	0.743884	1	-1.67164	0.000783594	0.0227598
FAM200B	-0.0416214	0.939022	1	1.44956	0.000177548	0.00732696
FAM212B	0.300077	0.380132	1	1.43769	0.000269961	0.0102123
FAM213A	-0.954977	0.00521815	0.285964	-1.06247	0.00130412	0.0326079
FAM227B	-0.10286	1	1	2.17782	0.00674554	0.0936214
FAM228B	0.232768	0.640882	1	1.37754	0.00597853	0.0879454
FAM24B	0.775189	0.077855	1	2.60325	1.1881e-07	1.71165e-05
FAM69B	-0.610041	0.0358566	0.894889	-1.21853	1.75562e-05	0.00117004
FAM84B	-0.92343	0.0161231	0.585646	-1.63326	6.29771e-07	7.1302e-05
FAP	0.964007	0.159092	1	2.33654	0.000459743	0.0152565
FASN	0.021546	0.999757	1	-1.46072	0.000492742	0.0161317
FAT4	0.711198	0.0134401	0.519482	1.11047	8.26911e-05	0.00388593
FBRSL1	-0.391272	0.384204	1	-1.05449	0.00467076	0.0758258
FBXO17	-0.796506	0.0640289	1	-1.1465	0.00377373	0.0660843
FCN3	1.27638	0.163964	1	2.79098	0.00445107	0.0734757
FHL1	0.96787	0.0030333	0.200766	2.08711	2.2768e-12	1.10662e-09
FIRRE	-0.429812	0.27193	1	1.53315	0.000824975	0.0235232
FLJ23867	-0.586069	0.171906	1	-1.29661	0.000619935	0.0191464
FOXC1	-0.980062	0.0193991	0.651343	-1.44208	0.000175748	0.00727765
FOXC2-AS1	0.136346	0.94301	1	3.13867	0.00251653	0.0508356
FOXM1	-0.429859	0.297538	1	-1.13211	0.000564264	0.0179572
FPGT	0.088427	0.786558	1	1.00837	0.000702457	0.0210728
FRG1	0.0571113	0.885176	1	1.01853	0.00507203	0.0799397
FRMD3	0.764558	0.137759	1	2.46183	2.30994e-05	0.0014435
FRMD6	0.985665	0.0318909	0.829473	1.68539	0.000288087	0.0107292
FUNDC2P2	0.453878	0.334996	1	1.29074	0.0032402	0.0600586
FXYD6	-1.60411	0.644114	1	-5.8257	2.26039e-09	4.89934e-07
GABBR1	-0.244377	0.660495	1	-1.77208	0.000422861	0.0142588
GADD45A	0.809259	0.00809797	0.381302	1.17563	3.76889e-05	0.00214871
GADD45G	-0.0339316	0.969688	1	-1.98171	0.00151429	0.0359825
GADL1	0.621991	0.595259	1	6.18714	8.78763e-10	2.10745e-07
GAL	-0.516994	0.555789	1	-2.06916	0.00653222	0.0920448
GALNT15	-1.02131	0.0635216	1	-1.4159	0.00659641	0.0925508
GAR1	-0.436719	0.284033	1	-1.01607	0.00679125	0.0940649
GAS6-AS1	0.438757	0.854584	1	3.02591	0.00516731	0.0808062
GATA3	0.976734	0.610724	1	-3.41718	4.60177e-07	5.38755e-05
GATA3-AS1	0	1	1	-5.16515	0.000174235	0.00725136
GATA6	-1.09831	0.0521775	1	-1.8929	0.000369438	0.0128972
GBP3	0.806904	0.0197361	0.656183	1.40599	0.00591928	0.0877731
GCH1	0.677702	0.148639	1	1.55801	0.000863476	0.0243036
GCNT4	0.979699	0.257268	1	2.81865	0.00286881	0.0554606
GDF6	-2.41744	0.157552	1	-5.96899	1.05312e-08	2.0351e-06
GGACT	0.994394	0.0411652	0.956902	1.43659	0.0043299	0.0722421
GGH	0.853861	0.00941715	0.421588	1.45276	2.41719e-05	0.00148166
GIMAP1	-0.862327	0.0111492	0.465692	-1.18987	0.000181854	0.00748542
GIMAP6	-0.779966	0.00521591	0.285964	-1.05268	0.000476626	0.0157192
GLDC	0.649037	0.238257	1	2.42359	6.37493e-05	0.00315585
GLIPR1	0.97319	0.00647765	0.32672	1.24012	1.94708e-05	0.00125758
GLIPR2	0.862225	0.019661	0.655099	1.22574	3.99349e-05	0.00223961
GLUL	-0.516551	0.0917623	1	-1.04845	0.000784891	0.0227789
GMFG	0.245682	0.68914	1	3.78643	6.55375e-07	7.38532e-05
GNA14	0.70643	0.181923	1	2.61276	1.69235e-05	0.00114211
GNAZ	-1.23969	0.147737	1	-2.65102	9.72095e-05	0.00441964
GNG10	0.385979	0.323898	1	1.42712	7.10785e-05	0.00341333
GOLGA2P10	-0.394442	0.236095	1	-1.49858	1.7802e-07	2.44045e-05
GOLGA2P7	-0.370365	0.316739	1	-1.31647	3.41783e-05	0.00197905
GOLM1	-0.628983	0.0565789	1	-1.21193	8.34775e-05	0.00391117
GPR116	0.537666	0.258539	1	3.56351	2.12136e-07	2.86729e-05
GPR124	0.349882	0.376775	1	-1.06744	0.000458657	0.0152309
GPR155	0.185825	0.662952	1	1.05891	0.00234712	0.0487855
GPR160	0.336339	0.60917	1	2.54039	0.000100373	0.00453073
GPX3	0.246031	0.63993	1	1.42884	0.0012881	0.0322817
GRAP	0.965826	0.0120755	0.488276	1.85903	1.5344e-06	0.000150066
GRAPL	0.981774	0.0367835	0.910467	1.78571	9.05326e-05	0.00418066
GREB1L	0.424881	0.560205	1	6.2273	8.8033e-10	2.10745e-07
GRIK5	1.4432	1	1	-6.59378	9.24923e-16	7.80797e-13
GSKIP	0.382508	0.326458	1	1.42063	4.47361e-05	0.00243038
GSTO1	-0.0165016	0.950863	1	1.06723	0.00743669	0.0996526
GTF2A2	0.398968	0.30795	1	1.02869	0.00660254	0.0925508
GTF2H5	0.215778	0.634626	1	1.29794	0.000817193	0.023378
GTSE1	-0.303768	0.472881	1	-1.22363	0.000149218	0.00641079
GUCY1A3	1.95593	0.208842	1	-3.03488	5.40435e-06	0.000431302
GYPC	-0.0204249	0.939045	1	5.17781	1.59389e-12	8.33637e-10
H1F0	-0.99951	0.00997893	0.435722	-1.14419	0.00248593	0.0507152
HCP5	0.532745	0.53314	1	2.41767	0.00688553	0.0949607
HDAC9	0.235689	0.798028	1	3.05388	0.00629512	0.0905285
HEY2	-0.0380599	0.900103	1	3.16153	6.15681e-05	0.00308597
HGF	-0.54642	0.402766	1	3.09038	0.000872978	0.024479
HHLA2	0.10723	0.934754	1	2.20846	0.00445117	0.0734757
HIGD1A	0.380564	0.384378	1	1.17694	0.00326134	0.0603341
HIST1H2BH	0.37023	0.567508	1	-1.54511	0.00200089	0.0435257
HIST1H2BI	-0.106295	0.812381	1	-1.60561	8.17547e-05	0.00384919
HJURP	-0.343217	0.305518	1	-1.41115	4.31004e-07	5.0831e-05
HMCN1	-2.27548	0.000826165	0.082609	-5.57079	2.97224e-20	3.86536e-17
HMGA1	-0.842539	0.0263286	0.766432	-1.44097	2.11677e-05	0.00134196
HMGCS1	-0.0817055	0.809151	1	-1.27406	0.00379711	0.066251
HNRNPUL2	-0.188421	0.632945	1	-1.11655	0.0018404	0.0411698
HOXA10-AS	-1.52646	0.333236	1	-3.58763	0.000284732	0.010644
HOXA10-HOXA9	-0.667882	0.345853	1	-2.36709	5.56929e-05	0.00286613
HOXA11	-0.444157	0.609523	1	-2.30163	0.000668952	0.0202699
HOXA11-AS	0.0730467	0.797275	1	-2.74205	0.00158345	0.0370226
HOXA5	-0.316401	0.536432	1	-2.4354	1.09091e-09	2.52366e-07
HOXA9	-0.653406	0.336166	1	-2.49224	9.20024e-06	0.000687418
HOXB3	-0.295159	0.567561	1	-1.18241	0.00376459	0.0660843
HOXB4	-0.11832	0.760536	1	-1.33549	0.000202993	0.00816008
HOXD10	-0.931988	0.105536	1	6.86189	3.59158e-05	0.00206235
HOXD9	-0.281154	0.680211	1	1.45107	0.00279853	0.054452
HRSP12	0.245709	0.552257	1	1.37041	0.000261447	0.00996854
HS3ST1	1.53698	0.139481	1	4.06926	0.00151688	0.0359846
HS6ST1	-0.440597	0.247388	1	-1.07464	0.00151199	0.0359633
HSCB	0.263363	0.493575	1	1.14432	0.00267843	0.0529502
HSD17B2	-0.236683	0.666218	1	4.86937	1.66615e-06	0.00016032
HSD3B7	0.53825	0.177886	1	1.36299	0.000833319	0.0237264
HSPA2	-0.239774	0.756374	1	-3.06496	2.28444e-14	1.59309e-11
HSPB11	0.582608	0.114334	1	1.23474	0.000753522	0.0221626
IFNGR1	0.6433	0.0548145	1	1.53104	3.42383e-07	4.19205e-05
IFT20	0.369958	0.381194	1	1.39756	0.000442437	0.014815
IFT43	0.373685	0.306716	1	1.10919	0.000518413	0.0168433
IGF2BP2	-0.694343	0.038457	0.929533	-1.01892	0.000868121	0.0243997
IGFBP2	1.18629	0.22181	1	-2.57991	0.000360546	0.0126633
IGSF8	0.0800081	0.968127	1	-1.21166	0.00414803	0.070181
IL13RA2	1.53168	0.175177	1	6.80633	2.0411e-08	3.58444e-06
IL15RA	-0.364819	0.354148	1	-1.06778	0.00334994	0.0613366
IL1A	0.344781	0.624322	1	2.71642	0.000277388	0.0104276
IL21R	1.27334	0.0549449	1	2.65292	3.16451e-05	0.00185009
IMPA2	-0.0759576	0.850465	1	-1.49476	0.000685623	0.0206451
INCENP	-0.362273	0.365865	1	-1.36612	1.59669e-05	0.00108978
INGX	0.335535	0.452961	1	1.12719	0.00461605	0.0753892
INO80C	-0.860201	0.0118977	0.483807	-1.18068	0.000300182	0.0110398
INSR	-0.222969	0.605879	1	-1.29854	0.00514219	0.0805967
IPO11-LRRC70	0.112944	0.780418	1	1.03052	0.00391321	0.0675771
ITGA10	0.321072	0.387182	1	1.18321	0.00109943	0.0289141
ITGAE	0.279657	0.516979	1	1.1637	0.00302537	0.057313
ITGAV	0.842751	0.0182801	0.627565	1.00405	0.000938144	0.0257217
ITGB8	-2.08919	0.0058363	0.30393	-2.46169	0.000164095	0.00692019
ITPKB	-0.661328	0.161917	1	-1.30943	0.00203565	0.0441025
JADE1	-0.388051	0.196828	1	-1.10114	0.00014	0.00606348
JMY	-0.754413	0.100589	1	-1.20735	0.00594155	0.0878931
KALRN	0.80028	0.0854355	1	1.5848	0.000331546	0.0118789
KATNBL1	0.120267	0.731322	1	1.00264	0.00201496	0.0437526
KATNBL1P6	0.21543	0.572806	1	1.06379	0.00514568	0.0805988
KBTBD8	0.575926	0.193337	1	1.35324	0.00272016	0.053424
KCNC4	-0.160649	0.651327	1	-1.24986	0.00632636	0.090815
KCNK1	0	1	1	-6.5501	6.27169e-05	0.00312403
KHK	-1.16048	0.0645817	1	-2.02943	0.000223446	0.0088057
KIAA0825	0.425578	0.514482	1	1.61838	0.00558799	0.0846608
KIAA1324	0.298672	0.531338	1	1.27815	0.00135345	0.0332818
KIF17	0.947233	0.106616	1	4.11447	1.39839e-08	2.54878e-06
KIF18B	-0.696943	0.204304	1	-1.70477	0.000118138	0.00523439
KIF22	-0.732824	0.0782691	1	-1.22643	0.000902417	0.0249986
KIF4A	-0.456098	0.277085	1	-1.11414	0.000391116	0.0134715
KIFC1	-0.294854	0.451701	1	-1.02664	0.00161979	0.0376992
KITLG	0.537914	0.0720823	1	1.76031	2.67502e-08	4.6301e-06
KLF12	-0.483686	0.291128	1	-1.18408	0.00408677	0.0695477
KLF15	-0.903734	0.298123	1	-2.44381	0.000154517	0.00660305
KLHL4	0.324664	0.377592	1	1.43411	8.12693e-05	0.00384026
KRCC1	0.315215	0.455641	1	1.10462	0.00433763	0.0723151
KRT15	0.633951	0.132749	1	1.90944	0.00426139	0.0715457
KRT19	-0.240915	0.548846	1	1.58965	0.00154472	0.0363644
KRT80	-0.642034	0.213286	1	-1.63269	1.80246e-05	0.00118505
KSR2	-1.27727	0.033667	0.858501	-1.95457	0.000500411	0.0163135
LACC1	0.111839	0.757885	1	1.01234	0.00250344	0.050763
LEPREL1	0.509335	0.193434	1	2.38948	2.86432e-07	3.66556e-05
LEPREL2	-0.260385	0.381602	1	-1.0691	0.000105313	0.0047315
LGALS3	0.665913	0.0612191	1	1.71405	3.12817e-08	5.31878e-06
LGALS3BP	0.327557	0.831452	1	2.6462	0.00102095	0.0273531
LHX6	2.30285	0.0769195	1	5.56274	0.000179007	0.00738086
LIMCH1	-0.341226	0.514032	1	1.83456	0.00533373	0.082447
LIMS3	0.260906	0.475544	1	1.58496	9.94353e-06	0.000735167
LIMS3L	0.260905	0.475539	1	1.58496	9.94625e-06	0.000735167
LINC00152	0.495963	0.165598	1	1.16754	0.000201389	0.00811689
LINC00346	0.593754	0.190848	1	1.28	0.00167054	0.0383689
LINC00467	0.217207	0.75735	1	1.57315	0.0026919	0.0531075
LINC00839	0.340044	0.355345	1	2.48398	1.96403e-05	0.00126175
LINC00960	0.481603	0.586843	1	3.93593	0.00103935	0.0277533
LINC00998	0.352949	0.435819	1	1.54235	0.000185289	0.00760079
LINC01116	-0.00165168	0.972666	1	1.04852	0.00358586	0.064024
LINC01139	0.0990497	1	1	5.61531	0.00377515	0.0660843
LINC01235	-0.233436	0.633777	1	2.99792	3.34216e-07	4.12354e-05
LINC01268	0.590739	0.385121	1	4.46749	1.34503e-05	0.000965975
LINC01296	0.0598021	1	1	5.85424	1.6964e-05	0.00114324
LITAF	-0.459155	0.393437	1	-3.23627	2.95203e-12	1.34005e-09
LLGL2	-0.482001	0.387769	1	-1.64845	0.00363857	0.064643
LMLN	0.265857	0.643601	1	1.35957	0.00269679	0.0531603
LMNB2	-0.323636	0.318579	1	-1.06007	4.57726e-05	0.00247633
LOC100132111	0.371639	1	1	-3.46517	6.01907e-05	0.00302955
LOC400043	0	1	1	-5.86551	0.00070912	0.0212218
LOC642236	0.0128821	0.963	1	1.01583	0.00605015	0.0885675
LOC727751	-0.350927	0.335648	1	-1.56077	8.65747e-07	9.36135e-05
LOC729603	0.281559	0.538256	1	1.11012	0.00318385	0.0593111
LPAR1	0.829348	1	1	-5.07488	2.57091e-08	4.46595e-06
LPHN2	0.528879	0.174298	1	1.36317	0.000402012	0.0137582
LPPR1	-4.15064	0.00956957	0.424786	-5.77929	0.000571121	0.0181104
LRIG3	-0.484226	0.178313	1	-1.10592	0.000373101	0.012987
LRP3	-0.721758	0.269086	1	-2.57882	1.56668e-07	2.17878e-05
LRRC16A	-1.24127	0.0498152	1	-2.42259	4.95853e-05	0.00261904
LRRC70	-0.272345	0.468395	1	1.04195	0.0022891	0.047724
LSM1	0.666642	0.116827	1	1.33223	0.000502619	0.0163744
LURAP1	-0.958677	0.051577	1	-1.33758	0.0042483	0.0714254
LY6K	0.707675	0.267592	1	2.15495	0.000534446	0.0171787
LY96	0.407159	0.443066	1	2.63833	5.99776e-06	0.000472341
LYN	0.113651	0.790401	1	1.1806	0.00132492	0.0328113
LYPD1	-1.02138	0.0744911	1	-1.76521	0.00132003	0.0327863
LYPLAL1	0.194709	0.61793	1	1.07606	0.00138887	0.0339409
LYRM5	0.518653	0.300791	1	1.59185	0.000760609	0.022315
LYRM9	0.166685	0.779324	1	1.39818	0.00329704	0.0606786
LZTS3	0.955412	0.0431636	0.98527	1.34551	0.00476779	0.0767535
MAGT1	0.0886438	0.810176	1	1.04259	9.79536e-05	0.00444235
MAP4K2	-0.635367	0.0468831	1	-1.13555	5.40177e-05	0.00279308
MAP7D3	0.323845	0.322754	1	1.08809	0.000461182	0.01527
MBNL3	-1.72645	0.0039067	0.233678	-1.92453	0.000839539	0.0238107
MED31	0.276425	0.577549	1	1.33324	0.00379462	0.066251
MEGF6	-0.329735	0.474768	1	-1.42886	0.000915965	0.0252575
MEIOB	-1.76454	0.0613048	1	-3.65349	2.154e-06	0.000195191
MEIS1	-0.777809	0.540112	1	-3.74213	3.5516e-05	0.00204421
MESP1	-0.396824	0.369869	1	-1.35679	0.00599274	0.0880464
MEST	-0.726336	0.19972	1	-2.28366	4.00261e-05	0.00224195
MFI2	0.886441	0.126876	1	1.98078	0.000634394	0.0194928
MFNG	-0.878108	0.0176251	0.615022	-1.15553	0.00111862	0.0293321
MFSD2A	-0.93851	0.0620943	1	-1.42292	0.00192579	0.0424876
MFSD7	-1.02016	0.0540228	1	-1.39903	0.00265712	0.052637
MGST2	0.770766	0.0107486	0.45642	1.65812	1.05763e-08	2.03564e-06
MIR1291	-0.160464	0.743634	1	1.53266	0.00207957	0.0447517
MIR22HG	0.275741	0.400474	1	1.03906	0.000410087	0.0139453
MIR4426	0.162046	0.734964	1	1.26381	0.0018654	0.0416516
MIR4435-1HG	0.472694	0.124407	1	1.13432	3.29174e-05	0.00191064
MIR6516	0.680106	0.459526	1	2.77023	0.000509837	0.0165759
MKI67	-0.413788	0.32624	1	-1.30775	8.55101e-05	0.00399086
MLIP	-0.783331	0.0500437	1	1.28457	0.00206803	0.044623
MMP2	-0.509977	0.219415	1	-1.8201	2.22335e-06	0.000200343
MOCOS	1.44967	0.0730581	1	2.73862	0.0021859	0.0462538
MOCS2	0.260641	0.472389	1	1.03388	0.00208486	0.0448255
MORN2	0.308543	0.466002	1	1.08367	0.00544827	0.0834904
MPC2	0.764309	0.0261401	0.765176	1.4757	1.2449e-06	0.000125319
MPP7	-1.12637	0.0546306	1	-2.00244	3.62949e-05	0.00207909
MPZL3	0.664189	0.0635654	1	1.75162	4.61018e-06	0.000375361
MR1	0.807128	0.018413	0.62926	1.9998	3.94071e-08	6.63004e-06
MRC2	0.468773	0.384298	1	-1.34648	0.00116445	0.0301948
MRPL13	0.171301	0.644399	1	1.04935	0.00227225	0.0474844
MRPL33	0.637963	0.194303	1	1.68593	0.000200336	0.00808705
MRPL50	0.348647	0.424225	1	1.28664	0.00387496	0.0671493
MRPS18C	0.262839	0.481862	1	1.04666	0.00314456	0.0588067
MRPS33	0.922689	0.0285817	0.797977	1.28204	0.00127501	0.032104
MT1A	-0.0800886	0.853123	1	2.45012	0.000877167	0.0245821
MT1E	0.0398129	0.959592	1	1.59809	0.00428179	0.0717378
MT1L	0.196748	0.665975	1	1.53233	0.0004147	0.0140426
MT1M	0.161324	0.890927	1	2.66032	0.000632306	0.019466
MTMR12	0.258075	0.567354	1	1.24536	0.00337753	0.0615606
MTUS1	-0.770321	0.0378026	0.921886	-1.12844	0.00162295	0.0377261
MUC17	0.787147	0.501586	1	5.12852	1.43647e-05	0.00101498
MX1	-0.825301	0.353533	1	-1.69276	0.00484971	0.0777337
MXD3	-0.30758	0.546355	1	-1.4161	0.00233021	0.0484761
MXD4	0.933712	0.0154387	0.567082	1.01354	0.0032761	0.0604497
MYBL2	-0.113181	0.764395	1	-1.1283	0.00035108	0.0124416
MYCBPAP	1.25831	0.0808779	1	2.12552	0.00251417	0.0508165
MYEOV2	0.383347	0.33052	1	1.17077	0.00142739	0.0346535
MYH10	-0.263098	0.402217	1	-1.24333	1.30559e-05	0.000939084
MYLK2	-0.0998869	0.85694	1	1.95079	0.00502094	0.0793945
MYO10	-0.506467	0.102173	1	-1.45003	8.97036e-08	1.32404e-05
MYO1B	-0.0064769	0.98477	1	1.92041	1.91526e-06	0.000178256
MYRIP	-0.596566	0.101773	1	-1.37242	1.36515e-05	0.00097605
NAB2	-0.509086	0.214496	1	-1.10194	0.00138737	0.0339216
NAT1	0.520536	0.184455	1	1.34501	0.000320883	0.0115949
NBEAL2	-0.693179	0.0326801	0.840461	-1.30635	4.06325e-06	0.000338262
NCAPD2	-0.409668	0.277715	1	-1.10073	0.00050974	0.0165759
NCL	-0.278613	0.448347	1	-1.07882	0.00145066	0.0349357
NDN	-0.235888	0.742943	1	-2.70669	2.3605e-05	0.00146704
NDUFA1	0.132208	0.751238	1	1.10765	0.00181787	0.0408368
NDUFA4	0.349951	0.443994	1	1.49164	0.000255574	0.00976275
NDUFAB1	0.383622	0.330506	1	1.15339	0.00166396	0.0383257
NDUFB1	0.562101	0.236939	1	1.41024	0.00106253	0.028247
NDUFB3	0.484054	0.276233	1	1.36874	0.00120967	0.0309119
NDUFB5	0.142636	0.768712	1	1.37542	0.000757651	0.0222568
NDUFB6	0.484048	0.295719	1	1.35521	0.0019424	0.0427074
NDUFS4	0.367302	0.321747	1	1.17783	0.000713397	0.0213213
NEBL	0.900063	0.0249363	0.746663	2.07389	4.17596e-07	4.94924e-05
NEDD9	0.669387	0.0320537	0.832358	1.22822	4.02201e-05	0.00224514
NEFH	0.399597	0.554717	1	-2.17193	0.000274106	0.0103446
NEK7	0.67513	0.0459836	1	1.05483	0.00095286	0.0260245
NENF	0.412022	0.252992	1	1.41107	8.29256e-05	0.0038891
NFATC1	-0.635585	0.188962	1	-1.25881	0.00539814	0.082907
NFATC4	-0.774243	0.11824	1	-1.43862	0.000894362	0.0248752
NFIX	-0.787052	0.0582668	1	-1.86902	8.25806e-07	8.96978e-05
NIPSNAP3A	0.271061	0.468951	1	1.30244	0.000193792	0.00785585
NKIRAS1	-0.00965673	1	1	1.28748	0.000342076	0.0121836
NLRP2	-2.21474	0.0196017	0.65435	-5.20271	7.16216e-11	2.40999e-08
NMU	-0.306957	0.863292	1	3.22744	0.0017425	0.0395124
NNAT	-3.6247	0.0585526	1	-5.65246	0.000159597	0.00678401
NOTCH1	-0.499325	0.158918	1	-1.07101	0.000395928	0.0135693
NPR1	-0.913459	0.0576988	1	-1.33977	0.00409341	0.0695477
NPR2	-0.115414	0.788876	1	-1.09088	0.0010734	0.0284573
NQO2	0.45139	0.225499	1	1.70816	9.72486e-07	0.000101286
NR2F1-AS1	0.288434	0.435122	1	1.09639	0.00360661	0.0642513
NR3C2	0.776056	0.0294093	0.80462	1.42314	5.39852e-05	0.00279308
NRK	0.982155	0.655532	1	-5.28484	4.25268e-17	4.01237e-14
NTPCR	0.307413	0.408835	1	1.06258	0.0060308	0.0883379
NUDT8	-0.166575	0.822358	1	-1.20795	0.00310239	0.05829
OASL	1.51196	0.305422	1	6.10119	0.00701051	0.0958148
OBFC1	0.436349	0.135029	1	1.10659	8.80577e-05	0.00408598
OGFRL1	0.720018	0.0231131	0.710188	1.18706	0.000147946	0.00637892
OSTC	0.147731	0.735242	1	1.12937	0.00128023	0.0321209
OSTCP1	0.177798	0.752354	1	1.34033	0.00416219	0.0703779
OSTM1	0.517167	0.131025	1	1.03494	0.00125843	0.0317364
OTUD6A	0.195236	0.712058	1	1.41184	0.00288331	0.0555622
OXSM	0.203297	0.567207	1	1.07204	0.00289687	0.055712
P4HA3	-0.501737	0.194489	1	-1.16502	0.0027451	0.053651
PAK1	-0.600541	0.37464	1	-2.72908	1.79743e-08	3.19146e-06
PAQR5	-0.872463	0.15249	1	1.72881	0.00190305	0.0421971
PCBP2-OT1	-0.495037	0.28418	1	-1.24789	0.00343222	0.0621166
PCDHGA11	-0.571628	0.279211	1	-1.45256	0.00105344	0.0280673
PCK2	0.193541	0.619393	1	-1.00236	0.000648269	0.0197928
PCSK5	-0.457811	0.420933	1	-2.92838	6.62827e-10	1.68751e-07
PCTP	0.525706	0.0865976	1	1.36474	5.42256e-07	6.24217e-05
PDCD10	0.551725	0.172037	1	1.51486	0.000128819	0.00562988
PDE10A	0.0242202	0.940448	1	1.03249	0.00017002	0.00713091
PDE1A	1.65779	0.0546705	1	6.64947	1.90562e-07	2.59024e-05
PDE3A	-1.38236	0.109146	1	-2.64555	0.00061878	0.019123
PDE3B	-0.421801	0.670882	1	-3.89546	6.52765e-11	2.21195e-08
PEG10	-2.03621	0.011478	0.474484	-2.09788	0.00634141	0.0909643
PET100	0.27382	0.503322	1	1.03466	0.00244311	0.050159
PEX2	0.0951291	0.836587	1	1.31382	0.000884636	0.0246765
PFDN4	0.312714	0.577262	1	1.49795	0.00437849	0.0726872
PGPEP1	0.2311	0.653878	1	1.40347	0.0040761	0.0694525
PHC1	-0.754894	0.105162	1	-1.23544	0.00357874	0.0640156
PHF19	-0.27796	0.495979	1	-1.15909	0.000153804	0.00658428
PHGDH	-0.988337	0.0354869	0.887043	-2.60112	1.43408e-12	7.75335e-10
PHLDA2	0.0819353	0.986127	1	-1.05408	0.0053014	0.0820497
PIM1	-0.271637	0.747889	1	-1.66181	0.000911802	0.0251628
PIM3	-0.481859	0.259464	1	-1.21816	0.00153203	0.0361306
PKDCC	-0.19104	1	1	-3.19959	8.8528e-06	0.000667679
PKHD1L1	-0.258177	0.663403	1	3.36812	1.47698e-05	0.00103438
PLA2G4C	0.862354	0.134727	1	2.23248	0.00018415	0.00757346
PLAC8	-0.481702	0.739731	1	-3.76575	2.1024e-06	0.000192325
PLAT	0.689213	0.154698	1	1.76097	0.001293	0.0323707
PLCB1	-0.976366	0.0251347	0.749339	-1.12469	0.00650724	0.0919305
PLCXD1	-0.939716	0.00941866	0.421588	-1.11657	0.000329735	0.0118316
PLEKHH2	-1.13587	0.0747047	1	-2.28909	5.34792e-05	0.00277936
PLGRKT	0.217342	0.525928	1	1.25279	0.00035117	0.0124416
PLK2	0.283213	0.507456	1	1.25044	0.00168957	0.0386033
PLLP	1.01811	0.163274	1	2.25594	0.00531557	0.082229
PLS1	-0.74889	0.188686	1	-1.35917	0.00568439	0.085529
PLSCR4	0.964844	0.0314777	0.824969	1.77651	2.36007e-06	0.0002103
PMAIP1	0.591074	0.0800919	1	1.41563	2.26151e-05	0.00141692
PODXL2	-1.04829	0.233678	1	-2.71315	3.91723e-05	0.00221232
POLB	0.458572	0.248994	1	1.21828	0.00128339	0.0321805
POMP	0.202656	0.626107	1	1.198	0.000864199	0.0243036
PON2	0.473819	0.122404	1	1.19056	4.22729e-05	0.00234612
PPAP2C	0.186568	0.716907	1	1.37896	0.000242625	0.00937723
PRKACB	-0.107681	0.754673	1	1.23514	0.000222965	0.00879397
PRKAG2	0.419256	0.124135	1	1.39516	3.08717e-07	3.8584e-05
PRKCE	0.59865	0.0454995	1	1.15668	1.22485e-05	0.000891639
PRKCQ-AS1	-1.41469	0.146106	1	-3.31377	3.02018e-05	0.00177427
PRR5L	0.531258	0.242145	1	1.44701	0.0055613	0.0843627
PRRG1	0.806842	0.0195102	0.653113	1.32561	5.26411e-05	0.00274727
PSG4	-1.44949	0.212416	1	5.84883	6.91395e-05	0.00333018
PSG9	-1.70931	0.143007	1	5.0003	0.00433907	0.0723151
PSMA6	0.227871	0.541798	1	1.08986	0.00140832	0.0343291
PSRC1	-0.291487	0.519598	1	-1.02828	0.00477899	0.0768825
PTER	-0.191326	0.629931	1	1.65811	0.00339598	0.0617098
PTGIR	-0.648818	0.313009	1	-2.12466	9.90231e-05	0.00447819
PTK7	-1.2084	0.073296	1	-2.13466	0.000177208	0.00732549
PTP4A3	-1.90539	0.00666492	0.333165	-3.19385	3.9745e-08	6.66358e-06
PTPLA	0.259793	0.420834	1	1.02034	0.00163064	0.03785
PTPN13	-2.89088	0.0136008	0.522719	-6.4389	3.24659e-20	3.90549e-17
PTPN4	0.193522	0.557041	1	1.05449	0.000330098	0.0118358
PTPRF	-0.409593	0.265179	1	-1.10066	0.00227501	0.047492
PTPRN2	0.185943	0.707144	1	1.37977	0.000602527	0.0187168
PTS	0.419168	0.314603	1	1.36385	0.000250452	0.00961026
PVRL4	2.02726	0.0695348	1	3.40602	0.00312656	0.0585841
RAB20	0.97257	0.139225	1	1.64856	0.00663841	0.0928635
RAB34	-0.627468	0.19178	1	-1.41399	0.00287835	0.0555622
RAB3B	0.061914	0.896474	1	1.2634	0.000539883	0.0173166
RAB9A	0.237302	0.548306	1	1.05374	0.00570365	0.0856955
RAC2	0.317992	0.385424	1	1.06088	0.000820822	0.0234461
RAC3	-0.463147	0.162903	1	-1.09182	0.000130636	0.0057041
RAMP2	1.1115	0.130341	1	2.03861	0.00620406	0.0899141
RARB	0.214852	0.671053	1	-1.17092	0.00427934	0.0717219
RASAL3	0.143654	0.858206	1	3.61334	3.67793e-07	4.45779e-05
RASGRF2	0.861706	0.100476	1	5.11814	4.27761e-11	1.51346e-08
RASGRP3	0.462264	0.583655	1	5.11164	9.84598e-07	0.000101886
RBKS	0.619794	0.387168	1	2.03523	0.00299114	0.0569109
RBX1	0.329667	0.417133	1	1.08877	0.00539168	0.0828343
RCN3	0.174136	0.614442	1	-1.6799	3.14681e-07	3.92276e-05
RGS10	-0.0444383	0.947314	1	1.19957	0.00548326	0.0838397
RGS20	0.0821525	0.882921	1	2.36372	0.00156855	0.0368012
RGS4	0.204735	0.463332	1	1.64008	2.50468e-08	4.36667e-06
RGS5	0.00717844	1	1	-5.4614	7.53499e-36	2.41713e-32
RGS7BP	-1.55114	0.334004	1	-4.20768	6.62762e-05	0.0032302
RGS9	1.82744	0.126952	1	3.4719	0.00319571	0.0594399
RHOBTB3	0.736894	0.0197517	0.656183	1.67232	8.71745e-08	1.29719e-05
RIBC2	-0.264712	0.638548	1	-1.71573	0.000676708	0.0204278
RNASET2	0.148275	0.845913	1	1.43855	0.00461522	0.0753892
RNF170	0.6927	0.143099	1	1.16059	0.0024081	0.0495607
RNF26	-0.150378	0.739264	1	-1.02488	0.00344801	0.0623262
RNF7	0.253204	0.449783	1	1.08041	0.000215476	0.00859012
RNFT1	0.637822	0.0409174	0.953002	1.11716	0.000457331	0.0152079
RNU4ATAC	-0.0664096	0.881185	1	1.82378	0.000672902	0.0203512
RNY5	-0.342151	0.603842	1	1.95833	0.00645476	0.0917277
ROBO1	-0.994836	0.304651	1	-4.36018	1.75053e-07	2.40663e-05
ROMO1	0.37637	0.323679	1	1.00034	0.00448091	0.0738575
RPA3	0.46085	0.226269	1	1.27205	0.00215111	0.0457623
RPL17	0.0480646	0.927999	1	1.08329	0.00389963	0.0674731
RPL17-C18orf32	0.0219751	0.976809	1	1.08295	0.00367032	0.0650491
RPL21	0.129096	0.775803	1	1.05328	0.00496527	0.0787212
RPL21P28	0.128916	0.77628	1	1.0537	0.00498547	0.0789634
RPL22L1	0.225001	0.691278	1	1.64808	0.000925702	0.0254677
RPL24	0.078955	0.865174	1	1.10767	0.00241006	0.0495799
RPL26	0.106328	0.843397	1	1.30011	0.00240374	0.0495558
RPL26L1	0.16642	0.609997	1	1.09523	0.000653682	0.0199153
RPL27	0.18605	0.65026	1	1.16563	0.00113475	0.0296587
RPL34	0.110193	0.824359	1	1.2873	0.00168485	0.0385504
RPL39	0.0315513	0.960839	1	1.31723	0.00105309	0.0280673
RPL9	0.103971	0.846358	1	1.36007	0.00156863	0.0368012
RPPH1	0.393528	0.42398	1	1.58494	0.000482713	0.0158783
RPS13	0.180331	0.678255	1	1.08411	0.00362744	0.0645268
RPS15A	0.247837	0.63305	1	1.57054	0.00044743	0.0149302
RPS18	-0.0630461	0.852242	1	1.00447	0.00387534	0.0671493
RPS20	0.218497	0.641531	1	1.21245	0.00244574	0.0501852
RPS27A	0.178934	0.697193	1	1.20605	0.00262798	0.0522966
RPS27L	0.562652	0.26471	1	1.95348	1.7737e-05	0.00117234
RPS29	0.161616	0.732035	1	1.3304	0.000952973	0.0260245
RPS3A	-0.0323583	0.924176	1	1.27294	0.00382054	0.0664906
RPS6KA5	-1.20907	0.0180226	0.622102	-1.96609	2.23731e-05	0.00140542
RPS7	0.117639	0.790926	1	1.22337	0.00114961	0.0299657
RRAS2	0.302219	0.332249	1	1.07245	0.000282063	0.0105786
RSPO3	-0.328016	1	1	-5.09873	3.58442e-06	0.000302262
RTKN2	-3.34717	0.00875752	0.400185	-5.03532	2.20386e-07	2.96216e-05
RWDD3	0.18533	0.636329	1	1.01633	0.00580335	0.0866146
S100A13	0.15707	0.742913	1	1.3588	0.00341614	0.0619834
S100A16	-0.386433	0.165548	1	-1.00013	0.000963431	0.0262208
S100A3	0.831484	0.294225	1	4.03785	2.95212e-05	0.00175805
S100A6	0.269482	0.478148	1	1.0398	0.0031372	0.0587149
SAMD12	-1.05013	0.0900163	1	-2.47287	2.4134e-05	0.00148122
SAMSN1	-1.04987	0.341911	1	-2.63584	0.00109359	0.0288335
SAPCD2	-0.673726	0.109449	1	-1.54089	8.98363e-06	0.000676485
SART1	-0.224276	0.510096	1	-1.02694	0.0014408	0.0348287
SCARB1	-0.0046767	0.962286	1	-1.3545	1.77703e-05	0.00117294
SCARNA10	0.328292	0.560408	1	1.51133	0.00524646	0.0814879
SCARNA13	-0.0764996	0.854357	1	1.19018	0.00628712	0.0904627
SCARNA16	0.130895	0.843268	1	2.59628	2.61228e-07	3.39724e-05
SCARNA18	-0.285971	0.543677	1	1.64384	0.000231843	0.00901116
SCARNA22	0.0700802	0.894151	1	1.16674	0.00626975	0.0904061
SCARNA5	-0.142156	0.762437	1	1.25066	0.00538137	0.0827899
SCARNA7	0.235486	0.657505	1	1.40425	0.003221	0.0597487
SCD	-0.0756418	0.817974	1	-1.34329	0.00090206	0.0249986
SCN8A	-1.67814	0.00684125	0.339358	-4.16425	1.87368e-17	1.80315e-14
SCOC	0.063268	0.885811	1	1.02571	0.00599323	0.0880464
SDC2	0.155732	0.651118	1	1.83827	6.61888e-08	1.02738e-05
SDC3	0.255998	0.577418	1	-1.22476	0.000357633	0.0125702
SEC11C	0.40223	0.28822	1	1.0695	0.00144874	0.034925
SEC61G	0.314858	0.474803	1	1.27136	0.000978537	0.0265568
SELENBP1	-0.0506749	0.923146	1	-1.51765	0.000772208	0.0225395
SELT	0.279407	0.572346	1	1.32371	0.00444515	0.0734757
SEMA3A	1.01438	0.127093	1	3.16015	1.42664e-05	0.001011
SEMA3E	-0.0460487	0.869298	1	1.03067	0.00098739	0.0267067
SEMA6D	-1.0197	0.0817028	1	-2.07324	6.2204e-06	0.000488276
SEPW1	0.525778	0.153531	1	1.20579	0.00100767	0.0270726
SERPINA5	0.26312	0.692957	1	2.30408	0.00017306	0.00720979
SERPINB1	0.4169	0.160866	1	1.24886	2.96571e-05	0.00176089
SFMBT2	0.612574	0.17708	1	1.6942	0.000110682	0.00495424
SHISA2	-0.437223	0.497618	1	-2.22589	0.000176332	0.00729556
SIPA1L2	-0.582287	0.0961544	1	-1.20799	0.00011408	0.00509211
SIRPA	-0.280625	0.570432	1	-1.16936	0.0048414	0.0777046
SLC12A7	-0.157283	0.653022	1	-1.02295	0.00144834	0.034925
SLC16A2	-1.25244	0.0665809	1	-3.25836	1.10995e-08	2.11939e-06
SLC22A17	0.420479	0.829841	1	-2.42371	6.85971e-06	0.000530668
SLC25A13	0.556565	0.059878	1	1.09371	5.37031e-05	0.00278457
SLC25A23	-0.430841	0.328998	1	-1.49066	0.000164956	0.00694433
SLC26A2	0.275922	0.433274	1	1.18931	0.000422585	0.0142588
SLC26A4	0.515076	0.176581	1	1.18488	0.00620754	0.0899141
SLC29A2	-1.64038	0.123696	1	-3.94029	4.71542e-07	5.49387e-05
SLC2A10	-0.305581	0.425324	1	-1.12763	0.0013849	0.0338816
SLC43A3	-0.752874	0.0470456	1	-1.1248	0.000672317	0.0203463
SLC46A1	-1.03051	0.0422437	0.972309	-2.33917	1.97593e-05	0.00126433
SLC47A1	-0.492728	0.36869	1	-2.06853	8.35342e-06	0.000632992
SLC6A15	0.914111	0.318925	1	5.40612	2.72671e-06	0.000237688
SLCO4A1	-0.583818	0.260707	1	-1.91195	3.87999e-05	0.00219902
SLFN12	0.24051	0.396621	1	1.1803	6.17849e-05	0.00309362
SLIT2	1.02307	0.189048	1	-2.58773	0.000133465	0.00580375
SLIT3	0	1	1	-8.39279	3.4356e-14	2.29603e-11
SLMO2-ATP5E	0.416828	0.418114	1	1.59997	0.000534043	0.0171772
SMCO3	-2.79293	0.0021685	0.158337	-3.49036	1.43098e-05	0.00101258
SMCO4	-0.799675	0.132451	1	-1.47478	0.00141336	0.0344171
SMIM20	0.223533	0.51883	1	1.04973	0.000769997	0.0225369
SMIM4	0.0628055	0.899417	1	1.25948	0.00538653	0.0828222
SMO	-0.468207	0.507923	1	-2.508	6.91503e-06	0.000533233
SNAR-A10	0.443543	0.564806	1	1.87625	0.00493191	0.0783767
SNAR-A11	0.443543	0.564801	1	1.87625	0.00493139	0.0783767
SNAR-A14	0.443543	0.564796	1	1.87625	0.00493151	0.0783767
SNAR-A3	0.443543	0.5648	1	1.87625	0.00493148	0.0783767
SNAR-A4	0.443543	0.564791	1	1.87625	0.00493094	0.0783767
SNAR-A5	0.443543	0.564805	1	1.87625	0.00493182	0.0783767
SNAR-A6	0.443543	0.564806	1	1.87625	0.00493141	0.0783767
SNAR-A7	0.443543	0.564803	1	1.87625	0.00493156	0.0783767
SNAR-A8	0.443543	0.564793	1	1.87625	0.00493118	0.0783767
SNAR-A9	0.443543	0.564801	1	1.87625	0.00493169	0.0783767
SNAR-G1	-0.0700947	0.875575	1	4.33439	0.00101271	0.0271778
SNCG	0.460021	0.212287	1	1.01674	0.00456502	0.0748414
SNHG10	-0.0836495	0.840571	1	1.1666	0.00690936	0.0951279
SNORA12	-0.161176	0.719642	1	1.52876	0.00040201	0.0137582
SNORA14A	-0.446456	0.376653	1	1.14202	0.00314809	0.0588499
SNORA16A	-0.123112	0.780463	1	1.61481	0.000650677	0.0198537
SNORA25	-0.255799	0.671042	1	1.64511	0.00140359	0.0342311
SNORA2A	0.00563775	0.987659	1	1.93202	9.14226e-05	0.00419932
SNORA34	-0.194422	0.70252	1	1.49727	0.00271068	0.0533778
SNORA40	-0.33689	0.517466	1	1.43684	0.00254284	0.0511096
SNORA43	0.0730438	0.920616	1	1.40084	0.00685501	0.094653
SNORA44	-0.216477	0.638021	1	1.36621	0.0030882	0.0580915
SNORA45A	-0.368053	0.410773	1	1.30946	0.00327575	0.0604497
SNORA49	0.133704	0.793108	1	1.41187	0.00149055	0.0356447
SNORA54	-0.282146	0.601517	1	1.42651	0.00613569	0.0893846
SNORA61	-0.417875	0.29283	1	1.05788	0.0070633	0.0963628
SNORA63	0.135651	0.726698	1	1.1959	0.00115085	0.029982
SNORA67	-0.272996	0.478655	1	1.19603	0.00117339	0.030262
SNORA68	-0.30451	0.507953	1	1.30068	0.00262028	0.0521865
SNORA74B	-0.262335	0.601875	1	1.54646	0.00223891	0.0469626
SNORA76A	-0.435403	0.315262	1	1.25334	0.00191721	0.0423369
SNORA76C	0.0361803	0.947997	1	1.30905	0.00159231	0.0372117
SNORA9	0.0362651	0.96849	1	1.84839	0.000531518	0.0171625
SNORD127	-0.153233	0.727931	1	1.36343	0.00240799	0.0495607
SNORD21	-0.511601	0.30044	1	1.22503	0.00257343	0.0514879
SNORD26	0.40392	0.442571	1	1.33783	0.00423266	0.0712215
SNORD36A	-0.542718	0.338885	1	1.19165	0.00518458	0.080912
SNORD57	-0.179184	0.746583	1	1.56067	0.00191351	0.0422911
SNORD58A	-0.110115	0.834093	1	1.47326	0.00637689	0.0912952
SNORD67	-0.0902332	0.856131	1	1.75922	0.00253163	0.0509694
SNORD97	0.0621172	0.891202	1	1.35886	0.00035715	0.0125624
SNRPG	0.529797	0.334991	1	1.56103	0.00332071	0.0608941
SOX2-OT	-0.480115	0.700984	1	-2.35676	0.000303655	0.0110859
SPINT2	-0.685452	0.323091	1	-3.73339	6.10332e-16	5.24427e-13
SQLE	-0.212761	0.513294	1	-1.0727	0.00540746	0.0829863
SQRDL	0.153905	0.657302	1	1.10303	0.000714273	0.0213342
SREBF2	-0.0266649	0.891599	1	-1.11654	0.000857686	0.0242196
SRGN	0.337672	0.449945	1	1.29773	0.00138504	0.0338816
SRP14-AS1	0.590827	0.48594	1	2.54532	0.0012332	0.0312971
SRPX	-0.962861	0.00330557	0.210382	-1.18892	0.00039345	0.0135265
SSR3	0.379823	0.260634	1	1.37773	1.16647e-06	0.000118664
ST3GAL6	-0.826965	0.0931486	1	-1.48487	0.0020528	0.0444005
ST6GAL1	-0.640306	0.0174303	0.613543	-1.17077	2.32263e-06	0.000207733
ST8SIA4	-0.99354	0.0126608	0.502235	-1.76831	5.70226e-06	0.000451285
SUB1	0.379347	0.418734	1	1.38772	0.00112139	0.0293574
SULF2	0.834582	0.0223763	0.697799	1.97019	3.70775e-07	4.47923e-05
SYBU	-0.154132	0.549358	1	2.06326	1.2001e-09	2.76298e-07
SYNE3	-0.358749	0.362241	1	-1.01872	0.00199898	0.0435038
SYNGR1	-0.407971	1	1	-2.58967	0.00377725	0.0660843
SYS1-DBNDD2	-0.355045	0.455867	1	-1.26516	0.00223636	0.0469293
SYT9	0.908798	0.338468	1	5.38788	1.95697e-05	0.00125991
TBX18	-0.417202	0.704299	1	-2.86022	0.00225502	0.0471974
TCEAL1	-0.211989	0.60697	1	1.23186	0.00166547	0.0383257
TCEAL8	0.0636718	0.885846	1	1.00918	0.00561885	0.0849905
TCEB1	0.449575	0.287264	1	1.3502	0.0010648	0.0282759
TCOF1	-0.269428	0.399925	1	-1.02261	0.000276094	0.0103952
TEFM	0.207263	0.529205	1	1.13882	0.00160861	0.0375163
TES	0.765464	0.0341114	0.864422	1.17845	0.000387148	0.0133827
TFF3	-0.385695	0.543466	1	3.31606	0.000262286	0.00996892
THBD	0.82684	0.0817474	1	1.70851	0.000290717	0.0107854
THBS2	-1.91897	0.11516	1	-4.27733	4.74633e-06	0.000382912
THBS3	-0.807018	0.0423876	0.972869	-1.38319	0.000112136	0.00501462
THEM6	-0.426476	0.238696	1	-1.00209	0.00213947	0.0456527
THOC7	0.317811	0.4059	1	1.05035	0.00577733	0.0863334
TICRR	-0.59004	0.200843	1	-1.27758	0.000444824	0.0148639
TIMM8B	0.204451	0.593105	1	1.0678	0.00221889	0.0466645
TM2D1	0.136818	0.73863	1	1.14379	0.00563774	0.0851122
TM4SF18	0.45624	0.122551	1	1.90704	1.12061e-10	3.43449e-08
TM6SF1	0.737966	0.0152258	0.560975	1.06342	0.000219327	0.00867891
TM7SF2	-0.511768	0.33837	1	-1.42396	0.00387286	0.0671493
TMEM126A	0.374107	0.370235	1	1.21541	0.00181725	0.0408368
TMEM126B	0.133983	0.785576	1	1.24333	0.00412573	0.0699761
TMEM14A	0.219322	0.578931	1	1.51736	1.967e-05	0.00126198
TMEM14B	0.233617	0.602379	1	1.3966	0.000720773	0.0214617
TMEM14C	0.248809	0.555384	1	1.33877	0.000567552	0.0180425
TMEM155	0.442814	0.730189	1	3.59488	0.00146324	0.0351513
TMEM189	-0.404279	0.202634	1	-1.04844	0.000355637	0.012558
TMSB10	0.576628	0.109218	1	1.26458	0.000135809	0.00588726
TMSB4X	0.719686	0.123489	1	1.55561	0.000275902	0.0103952
TNFAIP2	0.780219	0.0493422	1	1.28607	0.000272973	0.01031
TNFSF18	0.222006	0.723838	1	3.33571	1.34791e-07	1.92875e-05
TNRC6C	-0.636275	0.161887	1	-1.40497	4.36202e-05	0.00240774
TOR4A	-0.456876	0.207386	1	-1.09346	0.000594436	0.0185493
TOX	0.38761	0.366905	1	-1.25345	0.00196691	0.0430591
TP53I3	0.978223	0.00707769	0.34716	1.50551	4.73133e-05	0.00253396
TP53TG1	0.634564	0.139473	1	1.44616	0.000134688	0.00584921
TPD52L1	0.0338967	1	1	3.23422	8.01425e-05	0.00379931
TPM2	-0.97503	0.106646	1	-3.52515	3.46418e-10	9.36458e-08
TPT1	0.147251	0.769702	1	1.17139	0.00461944	0.0753904
TRAPPC2P1	0.599705	0.0987506	1	1.13226	0.00131242	0.0326912
TRIM7	0.342475	0.622297	1	2.19256	0.00262697	0.0522966
TRNP1	0.492067	0.145724	1	1.2079	0.000140547	0.00608171
TRPS1	-2.18982	0.000508478	0.0611673	-2.72166	2.9406e-05	0.00175335
TRPV2	0.898842	0.0119046	0.483807	1.27884	0.00116733	0.0302312
TRPV4	-0.298701	0.496855	1	-1.26227	0.00393886	0.0678103
TRUB2	0.238787	0.583666	1	1.01226	0.00602183	0.0882872
TSC22D1	0.616663	0.0301777	0.813536	1.00346	0.000101854	0.00459325
TSGA10	0.702452	0.28967	1	2.21672	0.00372897	0.0657014
TSPAN7	-0.653931	0.441815	1	-2.46675	0.0013737	0.0336728
TUB	0.627749	0.63033	1	-2.37652	0.00690768	0.0951279
TUBAL3	0.0400357	0.916448	1	3.84503	0.00218583	0.0462538
TXNDC17	0.256519	0.565289	1	1.17772	0.00618315	0.089777
TXNDC9	0.385968	0.33741	1	1.33318	0.000291026	0.0107886
TYRP1	0.293123	0.797027	1	4.83802	4.95613e-09	9.77373e-07
UBALD2	-0.493575	0.280207	1	-1.16958	0.00353692	0.0633853
UBE2Q2	0.221504	0.512795	1	1.05536	0.000530163	0.0171556
UBE2W	0.229846	0.570332	1	1.08109	0.00166469	0.0383257
UCHL3	0.361796	0.2658	1	1.06574	0.00052162	0.0169361
UHRF1	-0.665503	0.0686506	1	-1.33914	1.63834e-06	0.000158939
UQCRBP1	0.108087	0.805781	1	1.12715	0.00513751	0.0805967
UQCRQ	0.37763	0.319379	1	1.26432	0.000295876	0.0109155
USMG5	0.458391	0.375208	1	1.63427	0.000533131	0.017166
VAMP5	0.628352	0.0783888	1	1.07517	0.00562305	0.0849905
VASH1	-0.88084	0.0223462	0.69745	-1.73437	6.21688e-07	7.05528e-05
VLDLR	0.321861	0.607178	1	1.88221	0.000276666	0.0104086
VTRNA1-3	0.224906	0.560705	1	1.14468	0.00249788	0.0507152
WDFY4	-1.32682	0.0103007	0.444131	-2.01352	2.4729e-05	0.00151388
WDR62	-0.676322	0.128319	1	-1.23132	0.000283171	0.0106119
XKRX	1.56272	0.103266	1	2.95832	0.0033836	0.0616134
YAE1D1	0.664188	0.196482	1	1.61532	0.00211637	0.0453108
YPEL5	0.451442	0.234574	1	1.4287	7.27606e-07	8.04849e-05
ZBTB45	-0.378264	0.392751	1	-1.09285	0.00196624	0.0430591
ZCCHC14	-0.335386	0.390606	1	-1.16636	0.000665401	0.0201877
ZCCHC3	-0.445213	0.185623	1	-1.11073	0.000315303	0.0114417
ZEB2	-0.556362	0.126647	1	-1.0854	0.00166978	0.0383689
ZFAND6	0.304564	0.426324	1	1.10111	0.00224821	0.0470959
ZNF124	0.164983	0.706218	1	1.43197	0.000229855	0.0089711
ZNF140	0.165303	0.621986	1	1.10558	0.000295323	0.0109142
ZNF189	0.420578	0.189869	1	1.07461	0.000717777	0.0214123
ZNF226	-0.229406	0.521711	1	1.18833	0.00145136	0.0349357
ZNF277	-0.114618	0.785629	1	1.04404	0.0026681	0.0527676
ZNF32	0.0649402	0.887253	1	1.20926	0.00149489	0.0356447
ZNF395	-0.961596	0.0597032	1	-1.38151	0.00434656	0.0723444
ZNF415	0.472215	0.180142	1	1.74613	1.40911e-06	0.000138942
ZNF485	0.0429427	0.97322	1	1.65725	0.00718258	0.0973008
ZNF528	0.240354	0.501407	1	1.14892	0.000805546	0.0231725
ZNF585A	0.123657	0.836194	1	1.45854	0.00343866	0.0622035
ZNF613	0.250531	0.531393	1	1.13137	0.00600327	0.0880956
ZNF618	-0.537716	0.232945	1	-1.32866	0.000722163	0.0214633
ZNF664-FAM101A	0.832642	0.233571	1	-2.41679	0.000224398	0.00881434
ZNF702P	0.505433	0.1246	1	1.30437	2.1528e-05	0.00136107
ZNF846	0.280836	0.566128	1	1.45892	0.00341728	0.0619834
ZNF880	0.685353	0.145977	1	1.3275	0.00255784	0.0512775
MARCH4	1.34118	0.00307201	0.202215	0.674757	0.142585	0.56773
AADACP1	-1.82505	0.00462987	0.262473	0.168181	0.904546	1
ABCC3	1.16779	0.00287384	0.195315	1.01178	0.00912887	0.112577
ACOT4	-2.0559	0.000619826	0.0699318	-1.50255	0.0128693	0.140418
ACOT7	1.01069	0.0172519	0.609823	0.341904	0.380537	0.919949
ADAM19	1.29211	0.00144485	0.120168	0.539713	0.125261	0.530715
ADAMTS10	1.43037	0.0199667	0.66077	0.339258	0.562048	1
ADAMTS18	-1.57019	0.0158297	0.578354	-1.56725	0.0190208	0.179651
ADRA1B	4.44235	0.00110972	0.0992523	2.7708	0.0121799	0.136137
AGPAT9	-1.54481	0.00414825	0.244315	-0.787445	0.199334	0.670924
ALPL	4.92137	0.0414798	0.961891	3.0965	0.0799082	0.414532
ANKLE1	-1.28735	0.023875	0.724807	-1.18695	0.0262489	0.217275
ANKRD18B	-2.53562	0.000566907	0.0658974	-1.30868	0.156329	0.596623
ANKRD45	-2.00908	0.00575036	0.30043	0.0513987	1	1
ANO2	1.50393	0.040125	0.944631	1.45087	0.0426448	0.28695
ANTXR1	2.031	0.0445789	1	2.24205	0.0528733	0.326443
ANXA10	-2.63869	0.0018979	0.14314	-0.619761	0.72311	1
APCDD1L-AS1	2.60932	0.0122006	0.491273	0.994819	0.293055	0.817017
APLP1	2.40368	0.00156574	0.125358	0.716966	0.253085	0.758125
ARHGAP6	-1.89038	0.00461648	0.26244	-0.501575	0.520118	1
ARID5B	1.24454	0.00497	0.27647	1.03152	0.0156587	0.159429
ARVCF	1.43036	0.00164691	0.129699	0.794558	0.0681725	0.378896
ASGR1	-1.81661	0.00437549	0.254429	-1.41292	0.0356657	0.259827
ASMTL-AS1	-1.03954	0.0224243	0.69839	-0.48299	0.265759	0.777042
ATP1A1-AS1	2.3679	0.0325537	0.837658	1.56858	0.0871567	0.43413
ATP6V0E2-AS1	-1.31911	0.0310115	0.819974	-1.08064	0.0941185	0.452473
B4GALT6	-1.20356	2.98896e-05	0.00691455	-0.394733	0.212261	0.69365
BAIAP2L1	1.30952	0.00346076	0.215706	1.02276	0.0194349	0.181551
BCHE	-2.49728	8.40632e-06	0.0025764	1.11017	0.110757	0.49687
BDH1	-1.09239	0.0288817	0.798695	-1.1564	0.0100788	0.12046
BEX4	-1.21792	0.00289774	0.196109	-0.750367	0.0637318	0.363648
BLID	-1.65095	0.0138202	0.526943	-0.531066	0.604573	1
BOK	1.03886	0.00634143	0.321454	0.393635	0.331632	0.863508
BST2	4.28526	6.68747e-05	0.0136091	-1.21313	0.0804606	0.415831
C10orf128	-2.07106	0.0472052	1	-0.111165	0.958899	1
C19orf33	2.97896	0.000912608	0.089433	1.48807	0.0649399	0.367577
C2CD4B	-1.19152	0.0237465	0.721849	-0.714355	0.138539	0.559859
C3orf14	1.04741	0.0262174	0.76549	0.76942	0.100822	0.471069
C9orf135	4.99211	0.0400413	0.944631	5.32029	0.0252656	0.211503
CADM3	4.78173	0.000365441	0.0484788	-0.327999	0.725703	1
CASP12	-2.68401	0.00181945	0.139397	0.541699	0.789311	1
CD24	2.15183	0.0115985	0.477413	2.15291	0.00785172	0.102967
CD52	5.92127	0.0443476	1	6.26552	0.0377738	0.267583
CDCP1	-1.23995	0.00147797	0.120168	-0.592651	0.267368	0.779691
CDH2	2.38874	7.20946e-06	0.0023127	-0.467653	0.245662	0.746133
CEBPA	3.47701	0.0106632	0.453664	3.04783	0.0138785	0.147531
CHST15	-1.42058	0.00280681	0.191723	0.0954973	0.94649	1
CIDEA	-3.67305	0.00103271	0.0954197	-1.90291	0.207375	0.685051
CITED4	1.80689	0.0212047	0.679765	1.01721	0.162771	0.609604
CLDN7	-1.21882	0.0073185	0.354277	-0.192623	0.637369	1
CLGN	-2.24253	0.00339001	0.212472	-1.53097	0.154858	0.593271
CLIC3	2.54872	0.00904044	0.408075	1.86865	0.030615	0.237487
CNTN1	4.21181	0.00275899	0.189113	2.58898	0.0241499	0.205676
COL12A1	3.05179	0.00114457	0.101352	1.82123	0.0590151	0.348899
COL1A2	3.18377	0.03122	0.822345	-0.247972	0.839261	1
COL27A1	-1.51316	0.00850737	0.391355	-1.1478	0.0255747	0.213313
COL4A1	1.619	1.38603e-05	0.00387749	0.588019	0.118261	0.515348
COL4A2	1.06196	0.0022545	0.162559	0.0314107	0.945681	1
COL6A2	1.88733	0.00395734	0.235085	0.687396	0.262184	0.771945
CPED1	-2.76705	7.87073e-06	0.0024916	-1.36814	0.0327922	0.246542
CPS1	-1.91115	0.000161928	0.0268923	0.547963	0.404874	0.949038
CRHR1-IT1	-1.03045	0.0427277	0.978569	-0.428815	0.386148	0.927688
CRTAC1	-1.26945	0.036458	0.904858	-1.07466	0.0545206	0.332218
CSF1	1.14112	0.0167857	0.598735	0.659847	0.13729	0.556826
CSGALNACT1	-1.90299	0.0118895	0.483807	-1.59742	0.0285946	0.228754
CST2	-2.57232	0.0102523	0.442441	-1.66865	0.0952739	0.455443
CST4	-4.17611	0.000182385	0.0292589	-3.06141	0.00908897	0.112254
CTSS	-1.18296	0.00331444	0.210382	0.0251966	1	1
CXADR	-2.61729	0.002182	0.159081	0.190788	1	1
CYP1A1	3.1726	0.00687944	0.33938	0.742387	0.480245	1
CYTH3	1.31728	0.000113634	0.0198831	0.891958	0.00887969	0.110578
DDX60L	-1.02379	0.00502316	0.278461	-0.056055	0.872592	1
DHX58	1.49433	0.0101255	0.439727	0.384448	0.430004	0.977807
DIRAS3	4.05761	0.00295403	0.197969	3.11891	0.0123405	0.137104
DLGAP1-AS1	-1.20587	0.0313092	0.822795	-0.504969	0.366873	0.904968
DLX6-AS1	-1.42832	0.0486796	1	-0.769442	0.240697	0.738185
DOCK10	-1.06649	0.00212153	0.155379	-0.821207	0.0159177	0.161078
DOCK8	2.45612	0.00959986	0.424955	1.86917	0.0319911	0.243539
DUSP23	1.26874	0.000950061	0.0910262	0.303382	0.45465	1
DUSP4	-1.84001	0.000648949	0.0713407	-1.23669	0.025867	0.214967
DYNC2H1	-1.36416	0.000263218	0.0391781	-0.637619	0.0748735	0.39952
EDN2	4.75663	0.0282472	0.793923	5.0846	0.0129191	0.140741
EDNRB	-1.72265	0.0047218	0.265115	1.55396	0.0427232	0.287198
EFCAB2	-1.14051	0.0320792	0.832571	-0.0116574	0.965171	1
ENKUR	-1.31495	0.0489881	1	2.33015	0.043621	0.29103
ENPP1	-1.15876	0.00702323	0.34484	-1.14679	0.0114506	0.131011
EPAS1	1.203	0.00428716	0.251573	0.8978	0.0235009	0.202144
EPB41L1	1.41381	0.0124238	0.494464	0.843101	0.114631	0.506457
EPHX1	1.20103	0.0271552	0.776873	0.722162	0.178902	0.636748
EPHX4	-3.05387	0.000980768	0.0927163	-0.528613	0.795675	1
ERP27	-1.92375	0.00952181	0.424349	-0.647251	0.375672	0.916408
EXOC3L2	1.85633	0.0304713	0.814462	1.69104	0.0648102	0.367103
FAM117A	1.1205	0.0327173	0.840967	0.522466	0.371705	0.910955
FAM127B	1.09	0.0177528	0.616163	0.126752	0.789564	1
FAM129A	-1.39515	0.00629251	0.319391	-0.545921	0.353538	0.888469
FAM26F	-2.42882	0.00445323	0.257549	-1.56828	0.0875008	0.43527
FAM74A1	-2.86314	0.0205013	0.66836	-2.47847	0.0242508	0.206129
FAT1	4.74993	1.04965e-07	6.08517e-05	1.35226	0.0318443	0.242911
FBLN5	1.75201	0.038453	0.929533	-0.0179854	0.937599	1
FLRT2	1.25875	0.0196728	0.655099	1.1646	0.0286824	0.228961
FSD1	-1.39795	0.0380739	0.924339	-1.44076	0.0274174	0.223224
FSTL3	1.30969	0.000936521	0.0904501	0.299342	0.483	1
GDA	4.96724	0.0281096	0.79237	2.97711	0.0564611	0.339218
GDF5	1.63055	0.0351715	0.883089	0.714318	0.345057	0.876959
GJA4	6.57385	0.0198547	0.657966	6.91345	0.00841963	0.106811
GK	-1.21054	0.00451439	0.259526	-1.01118	0.0220257	0.195073
GK3P	-1.78232	0.0120269	0.487539	-1.27951	0.0914991	0.444697
GPR3	-1.34873	0.0179467	0.620374	-1.22911	0.0269368	0.220718
GPRC5B	1.72348	0.00430869	0.251914	1.50063	0.00846552	0.10722
GSTO2	-1.72675	0.00185732	0.141186	-1.36288	0.0111447	0.128878
GTSF1	-5.70468	0.000102208	0.0182827	-2.18289	0.75	1
GYPE	1.94433	0.0330292	0.845821	2.43572	0.00873511	0.109429
HAPLN1	8.41435	0.000539855	0.0633579	1.54343	0.333158	0.86428
HES1	1.63643	0.0214589	0.686543	1.91925	0.00979565	0.118043
HIF1A-AS2	1.77813	0.0200959	0.662986	1.88284	0.0283036	0.227516
HNMT	-1.70942	0.0264728	0.767962	-0.634096	0.478798	1
HS6ST2	-6.58083	1.52131e-07	8.51522e-05	-5.61185	9.09826e-05	0.00419339
HSPB8	1.27577	0.00468851	0.263861	0.916378	0.033717	0.250774
HTR1D	2.19367	0.00619281	0.316309	1.66348	0.0298666	0.234423
IGSF3	3.03804	0.000341757	0.0463231	1.10166	0.12015	0.51954
IL31RA	-2.39519	0.000353634	0.0473987	-1.19418	0.085245	0.428628
IL33	3.87772	0.00195416	0.145558	-0.67753	0.415691	0.961923
INPP4B	-1.32734	0.0128541	0.504909	-0.36718	0.447524	0.998625
ITPRIPL1	-1.47765	0.0384995	0.929533	-0.628518	0.3224	0.85322
JAM2	1.9087	0.0248387	0.744202	-0.715041	0.393684	0.937167
KCNJ2	1.2436	0.0313409	0.823178	-0.472518	0.408299	0.952789
KIAA1211	-2.32967	0.000808783	0.0812464	-1.67842	0.010151	0.121108
KIAA1217	1.16989	0.0301792	0.813536	1.15068	0.0425182	0.286419
KIAA1377	-1.10343	0.00626423	0.318628	-0.969687	0.0122708	0.136674
KIF19	-2.43393	0.0095948	0.424955	0.366698	0.901902	1
LINC00266-1	-1.76641	0.0269603	0.77311	-1.74061	0.0267224	0.220101
LINC00520	-1.90552	2.11573e-05	0.00527487	-0.642018	0.160971	0.605667
LIPG	1.27415	0.0440357	0.998414	1.43563	0.0232895	0.201229
LOC101928381	-1.61715	0.0454724	1	-1.199	0.169286	0.620452
LOC151475	-1.09851	0.0420589	0.971239	-0.193399	0.671045	1
LOC283585	4.10857	0.0415257	0.962491	3.44505	0.0231757	0.20112
LRRC17	-1.28665	0.0099289	0.433932	-0.652961	0.189496	0.653893
LRRC34	-2.02515	0.000604706	0.0691146	-0.905132	0.189275	0.653526
LTBP1	1.38554	0.0267193	0.769408	0.707387	0.224487	0.712012
LXN	-1.44834	0.00881952	0.402115	-1.07895	0.0409092	0.280449
LYVE1	-2.64842	1.18017e-05	0.00340043	-0.503725	0.491718	1
MAPK11	1.03872	0.00562684	0.296228	0.35865	0.281499	0.799974
MAST3	1.2005	0.0197599	0.656183	0.989279	0.0318278	0.242824
MEG3	1.63166	0.000542425	0.0635047	0.0434341	0.91973	1
MIR1287	2.31375	0.0463864	1	1.45462	0.256404	0.762619
MIR31HG	-1.00632	0.0393997	0.942113	-0.178228	0.799714	1
MKL2	1.03459	0.00439283	0.254667	0.637918	0.0687022	0.380898
MMP15	1.68067	0.013202	0.51396	0.66329	0.280717	0.799386
MMP24	2.67561	0.0450376	1	2.35122	0.0523626	0.324396
MTSS1	-1.00344	0.00106693	0.0966832	-0.962597	0.000506444	0.0164879
MXRA8	-2.65107	0.00606117	0.312529	0.116402	1	1
MYEOV	-1.32293	0.0370816	0.91416	-1.43172	0.0194845	0.181591
NAGS	-1.26455	0.00275035	0.189059	-0.709999	0.0727398	0.3938
NEURL1B	1.75748	0.016151	0.585646	0.245087	0.767616	1
NINJ2	2.42303	0.00167541	0.131299	1.3937	0.0235161	0.202144
NIPAL1	-1.43212	0.0174778	0.614023	0.475516	0.655574	1
NOL3	1.04142	0.00587901	0.304892	0.593918	0.127493	0.534593
NOX4	-1.53243	0.00311162	0.204263	-0.992556	0.0471222	0.304639
NREP	-1.03459	0.0012747	0.109154	-0.89128	0.0030663	0.0579059
NRP2	-1.21871	0.000603336	0.0691146	-0.543424	0.104697	0.48126
NT5M	-1.07599	0.0195414	0.653436	-1.10818	0.0186679	0.177207
OAS2	1.79759	0.0123114	0.493256	1.54071	0.0256801	0.213896
OSBPL6	-2.81002	2.77396e-06	0.00103666	-0.168661	0.83293	1
OSMR	1.30796	0.00609433	0.312963	0.701465	0.100818	0.471069
P2RX7	-1.07754	0.0450185	1	-0.859305	0.0934487	0.450919
PAX8-AS1	-2.43293	0.00754543	0.36268	-1.22372	0.280753	0.799386
PCDH17	2.8725	0.00715553	0.348929	1.209	0.172763	0.626797
PDE1C	1.38346	0.049178	1	0.467611	0.413154	0.958589
PDE6G	-2.93283	0.0126425	0.501923	-2.25857	0.0135575	0.145681
PDGFRL	-1.34444	0.038235	0.92638	-1.50954	0.0152892	0.157097
PGM5	2.11883	0.0068481	0.339358	0.032653	0.995177	1
PHLPP1	1.12272	0.0046779	0.263573	0.896879	0.0278882	0.225658
PINLYP	-1.83816	0.00233813	0.166429	-1.32896	0.0244274	0.207041
PIP4K2C	1.63856	0.0325151	0.837481	-0.658248	0.18039	0.638892
PIP5K1C	1.16786	0.0091784	0.412753	0.447774	0.294726	0.818949
PITPNM3	-1.73895	0.00432904	0.252491	-1.31612	0.0343625	0.253792
PLAC1	1.31199	0.0474756	1	1.59428	0.0096936	0.117313
PLCB4	2.13807	0.0220698	0.691647	0.886339	0.286955	0.808869
PLEKHG3	1.74315	0.00175836	0.136072	-0.211793	0.542199	1
PLVAP	1.76173	0.0482206	1	0.703033	0.419845	0.966469
PNMA2	-1.42319	0.0136388	0.523343	-0.00688236	0.967183	1
PNMAL1	1.20479	0.0181463	0.624134	-0.166728	0.750683	1
PPME1	1.28963	0.027681	0.783546	0.774947	0.163034	0.610237
PPP1R14A	3.08812	0.0489328	1	2.10519	0.0693139	0.383317
PPP2R5B	1.02685	0.00335573	0.211073	0.597601	0.111242	0.49798
PRDM12	2.1397	0.0474572	1	2.29928	0.0369154	0.265083
PRKAA2	-1.82825	0.0148499	0.555203	-1.55591	0.0348893	0.256228
PRKCZ	3.62	0.000776104	0.079851	1.3297	0.129256	0.537893
PRPH2	-2.11949	0.0388068	0.932254	1.18099	0.218658	0.703959
PRSS2	-1.6681	0.0273157	0.778199	-1.65413	0.0365728	0.2638
PRTFDC1	-1.06727	0.00191301	0.143727	-0.646419	0.0653392	0.368885
PSG1	-2.4713	0.00119204	0.103536	3.90673	0.170764	0.622679
PTPN20B	-3.08809	0.00689364	0.33938	-2.52151	0.0329732	0.247405
PTPN22	-1.58567	0.00838601	0.390627	0.286838	0.809435	1
PTPRD	-2.59586	0.00342763	0.213918	-1.08738	0.206293	0.683683
PVR	1.20918	0.000658207	0.0719809	0.920178	0.0173426	0.169266
QPCT	-1.16533	0.0321771	0.834661	-0.769099	0.147884	0.579232
RAB38	-1.76321	3.09923e-05	0.00713536	-1.17554	0.0169747	0.166947
RAB3IP	-2.20392	1.31128e-08	1.06943e-05	-0.655268	0.122538	0.525236
RAET1K	1.4355	0.0285012	0.796875	0.035734	1	1
RAET1L	1.41657	0.0121844	0.49103	1.50484	0.00755288	0.100515
RALGPS1	-1.33974	0.0251046	0.748903	-1.14267	0.0456804	0.298514
RANBP17	1.80378	0.011087	0.463497	-0.429987	0.532404	1
RASSF2	-1.58408	0.000597508	0.0686179	-0.906681	0.0603118	0.353258
RGL1	-1.69863	0.000410451	0.0529492	-1.07181	0.0156487	0.159429
RGS17	-2.22837	0.00113338	0.10062	-1.34731	0.0913523	0.444593
RHOXF2	-6.7226	0.000289331	0.0414345	-3.71883	0.0813314	0.417692
RHOXF2B	-6.7226	0.000289184	0.0414345	-3.71882	0.08132	0.417692
RNF150	5.11179	6.8224e-05	0.0137356	2.60991	0.0108253	0.12628
RNU1-13P	-1.90441	1.75834e-05	0.00460008	-0.715554	0.0865266	0.43261
ROBO2	2.03906	0.00249348	0.175907	0.684106	0.24983	0.752132
ROGDI	1.00974	0.0319169	0.829701	0.222312	0.664978	1
SCARNA14	-1.30824	0.0220038	0.691647	-0.258698	0.642505	1
SCARNA27	-1.28977	0.0163514	0.589359	0.461542	0.288818	0.810955
SCG5	-1.24531	0.0437252	0.993844	-0.00155096	0.904161	1
SCIN	-3.67308	1.86441e-07	9.96796e-05	-2.68308	0.00477591	0.0768586
SELP	2.31327	0.0182316	0.62662	2.50155	0.00956635	0.116153
SEMA3D	1.70898	0.00120189	0.104203	1.3213	0.010745	0.125645
SERINC2	1.39368	0.0125308	0.498312	0.95347	0.068559	0.380252
SERPINE2	1.28941	0.0449038	1	0.382831	0.501007	1
SH2D5	-1.33254	0.0351428	0.88303	0.0931371	0.837601	1
SH3BGR	1.67058	0.029365	0.80462	1.36781	0.0448974	0.296037
SHC3	-1.98716	0.0191079	0.647943	-0.312928	0.675417	1
SIPA1L1	1.40693	0.0107791	0.45642	0.906988	0.0684529	0.379866
SLC25A21	-1.83903	0.0260376	0.763485	-0.920474	0.352938	0.887658
SLC7A11-AS1	-3.09747	0.00018242	0.0292589	-2.11898	0.00602878	0.0883379
SLCO2A1	2.82246	6.87067e-09	6.48241e-06	0.913033	0.0215567	0.192134
SNORA13	-2.04047	9.83972e-05	0.0178667	0.0163333	1	1
SNORA32	-1.14231	0.0167162	0.5967	0.0404875	0.860194	1
SNORA41	-1.46811	0.0165805	0.595822	0.747981	0.130549	0.540695
SNORA45B	-1.32983	0.0125772	0.499744	0.0477794	0.92333	1
SNORA53	-1.17959	0.0233714	0.714931	0.28112	0.447059	0.997985
SNORA66	-1.24625	0.0137452	0.524915	0.486662	0.273173	0.787852
SNORA70B	-1.81747	0.0354147	0.886619	0.765332	0.620828	1
SNORA80E	-1.04692	0.0116753	0.480165	-0.123474	0.669457	1
SNORD113-6	2.46302	0.0347814	0.877155	0.663305	0.391314	0.934108
SNORD15A	-1.02434	0.0294268	0.80462	0.162268	0.618691	1
SNORD75	-1.43975	0.0475322	1	0.238457	0.570002	1
SOX17	1.0053	0.0109802	0.461072	0.53103	0.177964	0.635118
SPANXA1	2.29792	0.0129327	0.507293	2.11474	0.0163095	0.163304
SPANXA2	2.29793	0.0129359	0.507293	2.11475	0.0163107	0.163304
SPECC1	2.33206	0.00553079	0.294889	1.07266	0.141105	0.564746
SPTBN2	-1.40233	0.00209031	0.15356	-1.0491	0.0236652	0.202728
SPTBN5	-1.08294	0.00829797	0.386901	-0.889312	0.0258859	0.214978
SRRM2-AS1	-1.42936	0.015687	0.573575	-1.1436	0.0539519	0.330371
SSX2IP	-1.47627	0.00364776	0.223614	-1.00497	0.0529132	0.326587
STAMBPL1	-1.69887	0.000212377	0.0336157	-1.02156	0.0200223	0.184637
STEAP2	-1.72621	0.0219754	0.691572	-1.10723	0.147474	0.578522
SULF1	4.45935	1.23843e-05	0.00354706	-0.89945	0.189545	0.653893
SUPT20HL1	-3.22548	0.0228267	0.704991	-3.65994	4.66156e-06	0.000378254
SYT15	1.61455	0.0342725	0.867047	1.50553	0.0343513	0.253788
TBX3	1.07377	0.0317341	0.827631	1.27341	0.0192961	0.18079
TBXAS1	-1.10058	0.0217316	0.689838	-0.281136	0.545208	1
TDRD9	-2.62279	0.000768388	0.079851	-2.37002	0.00162434	0.0377403
TFEC	-2.315	2.36047e-08	1.57751e-05	-0.430899	0.278793	0.796566
TFPI2	-2.58703	9.32837e-06	0.002782	-0.921361	0.122815	0.525287
TGFB2	2.66399	1.08842e-05	0.00321303	0.856756	0.179819	0.638092
TGFB2-OT1	2.67929	5.75709e-05	0.0119405	1.40729	0.0865538	0.43262
TMEM35	-1.64676	0.000347165	0.0467924	-1.01728	0.0148806	0.154749
TMEM37	-1.46558	0.00467554	0.263573	-1.03879	0.0573633	0.342585
TMEM45B	-1.46181	0.0117912	0.482867	-1.8482	0.0108437	0.12643
TMEM71	-1.94469	0.00520708	0.285964	-1.24493	0.12644	0.532845
TMEM88	1.4553	0.00522981	0.285964	0.133471	0.84836	1
TMEM91	-1.03514	0.022778	0.704975	-0.993469	0.0297428	0.23385
TMTC1	2.56939	3.73206e-06	0.0013013	0.582533	0.179179	0.637139
TPM1	1.00986	0.00285476	0.194569	0.913662	0.00301069	0.0571472
TSPAN12	-1.37816	4.89569e-07	0.000235571	-0.627623	0.0398572	0.276626
TTLL7	-2.20098	1.79834e-05	0.0046274	-1.80819	0.000224307	0.00881434
TUBB3	1.13021	0.00542308	0.294009	0.609407	0.124144	0.527641
TYMP	1.4209	0.0308388	0.817555	0.832402	0.209026	0.687815
UBR3	1.14026	0.00364787	0.223614	0.8622	0.02237	0.197035
ULBP3	1.22713	0.0061402	0.314648	0.112398	0.776424	1
UNC13D	1.90844	0.0110663	0.463341	1.41632	0.0663319	0.372347
VCAM1	1.64755	0.0146098	0.548357	0.128155	0.891388	1
VWF	2.0841	0.000108783	0.0192441	0.169745	0.746859	1
WBSCR27	3.945	0.0256429	0.757449	0.353888	0.831157	1
ZC4H2	-1.01769	0.0467585	1	-1.15658	0.0171327	0.167901
ZNF169	-1.11417	0.0261907	0.765176	-0.589233	0.232734	0.725322
ZNF232	-1.18926	0.00954383	0.424427	-0.468853	0.232195	0.724674
ZNF462	1.02826	0.0381081	0.924702	0.565058	0.223212	0.710399
ZNF667-AS1	-1.31736	0.0174562	0.614005	-0.0823462	0.970058	1
ZNF695	-1.07912	0.0118564	0.483071	-0.228812	0.447304	0.998348
ZYG11A	-1.20915	0.00900349	0.406953	-0.970081	0.0279957	0.226251

## Sheet: B2. GO_PIK3CAmut+ Patient EC
B2. GO Analysis
BIOLOGICAL PROCESSES PIK3CAmut+ Patient-derived ECs vs Control ECs
TermID	Term	Enrichment	logP	Genes in Term	Target Genes in Term	Total Target Genes	Gene Symbols
GO:0002313	mature B cell differentiation involved in immune response	1.03e-05	-4.99	13	5	499	NOTCH2;DOCK10;LFNG;MFNG;PTK2B
GO:0030335	positive regulation of cell migration	1.51e-05	-4.82	269	20	499	CSF1;SEMA3D;SEMA6D;SEMA4C;PDGFB;TWIST2;PIK3R3;CLDN1;RHOD;IGF1R;PAK1;GLIPR2;HYAL1;IL1B;CCL5;SNAI1;SNAI2;F2RL1;PTK2B;DDR2
GO:0048522	positive regulation of cellular process	1.96e-05	-4.71	625	34	499	COLEC12;ANKLE1;CSF1;CDCA7L;PDGFB;TGFA;IRS2;IGF1R;PAK1;HYAL1;CCL5;PTK2B;ITGAV;MFSD2A;TUB;CAMK1D;HMGA2;NRG1;MERTK;OSMR;RHOD;MEIS2;TBX3;AR;FRMD5;P2RX5;SFRP1;EPGN;MEIS1;TNFSF4;IL1B;IL7R;BMPR1B;TLR4
GO:0045596	negative regulation of cell differentiation	2.53e-05	-4.6	191	16	499	ABCA1;TWIST2;RORA;LRP3;MEIS2;TBX3;SFRP1;MEIS1;ID2;ENPP1;SNAI2;PTK2B;ITGAV;ANKRD2;PPARA;RUNX1T1
GO:0008284	positive regulation of cell population proliferation	6.53e-05	-4.19	474	27	499	CSF1;CDCA7L;PDGFB;TGFA;IRS2;IGF1R;PAK1;HYAL1;CCL5;PIM1;PTK2B;ITGAV;HMGA2;NRG1;OSMR;MEIS2;TBX3;AR;SFRP1;EPGN;MEIS1;TNFSF4;ID2;IL1B;HPSE;IL7R;DDR2
GO:0007157	heterophilic cell-cell adhesion via plasma membrane cell adhesion molecules	7.3e-05	-4.14	42	7	499	SELP;ALCAM;HMCN1;FAT4;PVR;SELE;ICAM1
GO:0043062	extracellular structure organization	0.000111	-3.96	216	16	499	POSTN;ITGB4;MMP1;LAMA3;PDGFB;ICAM1;COL3A1;MMP24;MMP16;COL8A2;COL8A1;ITGB8;COL6A3;SLC39A8;ITGAV;DDR2
GO:0022603	regulation of anatomical structure morphogenesis	0.000261	-3.58	123	11	499	LFNG;SFRP1;CEACAM1;PAK1;LRRK2;NEDD4L;TNFAIP3;VASH1;TSPAN12;PHLDB2;LZTS3
GO:0045597	positive regulation of cell differentiation	0.000279	-3,55	258	17	499	FOXC1;CSF1;LPL;LRP3;GDF6;ACVR2B;TMEM100;AR;SFRP1;CEACAM1;GPRC5B;GLIPR2;ID2;IL1B;SNAI1;BMPR1B;DDR2
GO:0014066	regulation of phosphatidylinositol 3-kinase signaling	0.00032	-3.49	106	10	499	SELP;CEACAM1;CCL5;PDGFB;F2RL1;IRS2;PIP5K1C;PTPN13;PIK3CG;IGF1R
GO:0006869	lipid transport	0.000401	-3.4	109	10	499	ABCA1;ABCC3;CEACAM1;ACSL1;ABCA6;ABCA3;SLCO2A1;ABCA8;PITPNC1;MFSD2A
GO:0030198	extracellular matrix organization	0.000576	-3.24	300	18	499	POSTN;ITGB4;MMP1;LAMA3;PDGFB;ICAM1;COL3A1;MMP24;FLRT2;MMP16;COL8A2;COL8A1;ITGB8;COL6A3;SLC39A8;ITGAV;A2M;DDR2

## Sheet: C2. DEGs_PIK3CAmut+ Patient EC
C2. Differentially regulated genes in PIK3CAmut+ Patient-derived ECs vs Control ECs
Symbol	PIK3CAmut+ Patient EC vs Ctrl ECs log2FC	PIK3CAmut+ Patient EC vs Ctrl ECs Padj
PKP1	5.86261	2.14e-17
IGFBP5	5.71426	1.64e-12
VWA1	4.57823	1.58e-11
TRIML2	4.6543	4.25e-11
MPZL2	2.58698	2.07e-10
PIK3R3	2.304	5.06e-10
C10orf54	2.27777	2.62e-08
ASPH	1.18252	4.49e-08
CPA4	3.6282	4.64e-08
ALCAM	1.41537	4.15e-07
APBA1	2.00252	7.49e-07
CH25H	7.21624	1.04e-06
TUBB2A	1.38201	1.63e-06
ACADS	1.0904	1.68e-06
HYAL1	1.86046	2.42e-06
MALT1	1.3842	2.51e-06
GNAI1	1.42991	3.83e-06
PPARA	1.80482	8.03e-06
TNFRSF11B	3.22957	1.26e-05
AC022182.3	6.58721	1.84e-05
DDIT4	2.13396	3.58e-05
IFI44	1.60446	3.77e-05
LRMP	3.79255	5.24e-05
WARS	1.61982	5.73e-05
OAS2	1.90722	5.73e-05
ULBP2	1.63844	5.93e-05
RP11-553A10.1	4.8425	6.88e-05
RAP1GAP2	3.45359	7.61e-05
LRRC38	7.10961	7.86e-05
EPAS1	1.42806	9.53e-05
ANO4	4.50194	0.000105206
DCAF4	1.41413	0.000125252
RGS7	3.581	0.000125252
TGFA	5.78463	0.000181004
ABI3BP	2.29273	0.000193465
C8orf4	3.16469	0.000222327
FAT4	1.04064	0.000222692
TP53I3	1.46953	0.000241214
TMEM100	3.05222	0.000324201
ICAM1	1.87563	0.000324201
GALNT18	2.94916	0.000324201
TNFAIP3	1.77896	0.000335991
CYGB	5.46736	0.000486387
KIAA1462	1.11083	0.000505956
ESX1	3.88321	0.000542231
KIAA1324	2.25308	0.000560661
LFNG	1.97138	0.000603988
NEDD4L	1.36402	0.000652144
TNFAIP2	1.2381	0.000655349
PLEKHA2	1.98766	0.000681311
KRT81	6.56686	0.000749933
MXD4	1.26304	0.000756926
LINC00961	1.4988	0.000756926
RHOBTB3	1.38156	0.000756926
EPN3	6.15242	0.000803958
WNK4	4.14507	0.000803958
ABCC3	1.39202	0.000803958
LINC00086	4.82143	0.000842057
KRT7	2.7859	0.000865771
SORBS2	1.88081	0.000895016
RP11-407N17.3	6.21904	0.00090279
PVR	1.40044	0.000969169
TLR4	2.02587	0.00108947
FABP4	5.68548	0.00114881
GRAP	1.70977	0.00128744
ABCB1	3.37345	0.00128744
OSMR	1.64851	0.0015789
AREGB	5.66	0.0015789
MCF2L	3.4371	0.0015789
SOCS2	2.33391	0.00160088
CYTH3	1.2707	0.00166414
RP11-536O18.1	6.29994	0.00170539
PTK2B	1.70498	0.00198151
TRPV2	1.39931	0.00199534
ARID5B	1.38665	0.00242008
A2M	5.66227	0.00247622
FLVCR2	2.96837	0.00291551
LPL	6.55599	0.00296555
PLCE1-AS1	5.43932	0.00328307
OLAH	3.35087	0.00329325
KANK3	1.125	0.00336669
PVRL4	4.00564	0.0034135
CRYAB	3.08799	0.00347009
PLA1A	3.06182	0.00355592
COL8A1	2.03572	0.00355592
BAIAP2L1	1.38938	0.00377189
PHLDB2	1.34892	0.00389172
BDKRB2	3.24516	0.00402524
TMEM217	2.33808	0.00418519
PHLPP1	1.25378	0.00437909
PRRG1	1.19096	0.00479707
TES	1.22254	0.00512251
ARHGAP25	2.15956	0.00638477
ANGPTL4	1.99711	0.00667243
TUBB3	1.57756	0.00669641
NOSTRIN	2.98949	0.00676625
CA2	6.11751	0.00682419
S100A4	3.29828	0.00682419
IL7R	1.60397	0.00684117
CITED4	1.9071	0.00684117
FHOD3	6.0088	0.00745291
FILIP1L	1.45597	0.00759082
TUFT1	1.73964	0.00777809
TRPM2	3.39008	0.00783052
PLSCR4	1.65146	0.00792276
ID2	1.86907	0.00816174
SULF2	1.59754	0.00824675
FAS	1.99256	0.00857086
SNAI1	1.58881	0.00887423
DNAJC19P9	5.73724	0.00967578
OTOF	4.53081	0.00972482
THBD	1.66691	0.0104558
AC046143.3	2.01083	0.0115076
SELE	7.98435	0.0119504
PPME1	1.47071	0.0128788
FHL1	1.427	0.0128788
ITGAV	1.08515	0.0132651
PRSS12	4.01601	0.0133249
EPB41L1	1.39026	0.0139032
CLIC3	2.69959	0.01439
UBR3	1.161	0.0151644
EPGN	3.42835	0.0164479
CLDN1	3.50935	0.0165615
C5orf46	4.38667	0.0168486
ADD2	3.06506	0.0171691
GPRC5B	1.93023	0.0175959
HSPB8	1.33147	0.0177676
IL32	1.49286	0.0177968
CD274	1.00255	0.0182612
MYO1F	2.92967	0.0201126
FAM110D	3.49356	0.0204843
IL1B	4.60975	0.0205952
PITPNC1	1.11185	0.0209565
SLCO2A1	1.89463	0.0209603
ACTA2	1.50685	0.0214154
CTD-2066L21.3	5.36911	0.021916
CEACAM1	4.07769	0.0222966
LAYN	3.23584	0.0223981
SOCS2-AS1	2.54897	0.0227609
RP11-14N7.2	1.31733	0.0240436
AC027612.6	1.21163	0.0246946
STOM	1.04684	0.0259418
ITM2A	2.05897	0.0265093
GLIPR2	1.15023	0.027163
LPHN2	1.26526	0.0274937
TNXB	3.08911	0.0277037
DOC2B	1.83049	0.0277516
P2RX5	3.5903	0.0278325
HIF1A-AS2	2.92734	0.0278325
MR1	1.75716	0.0279827
SNAI2	2.58978	0.029019
SEMA3D	1.83681	0.0294214
GRAMD1B	2.86936	0.029434
SERINC2	1.42847	0.0304438
UNC13D	2.10684	0.0315618
PDPK2	2.87642	0.0319804
CRADD	1.03513	0.0320054
SCEL	4.90352	0.0322413
PDGFB	1.0416	0.0348574
SELP	2.87714	0.0360285
VWCE	1.73025	0.0374425
MMP24	3.06598	0.0379044
EPHX1	1.35188	0.039484
RHOD	1.27503	0.0401169
MID2	1.03306	0.0401423
SATB2	2.33527	0.0401423
ID3	1.11297	0.0412926
PLCXD3	3.00181	0.0412926
ABAT	2.13799	0.0419769
DENND2C	2.53931	0.0421388
COL6A3	3.72683	0.0422296
A4GALT	1.80229	0.0424888
MGST2	1.05485	0.043765
HSD3B7	1.20427	0.0456706
GCH1	1.36456	0.0489688
CD70	4.21809	0.0494361
EXOC3L2	3.11856	0.050179
PADI1	4.14925	0.0513038
FAM167B	2.44129	0.0552488
MYCBPAP	1.86489	0.0567831
PIP5K1C	1.07233	0.0577556
ZNF366	1.79416	0.0585169
LZTS3	1.31198	0.0587106
TUBA1A	1.21204	0.0608792
ARHGAP42	1.16639	0.0608792
FLRT2	1.54363	0.0617453
TYMP	1.612	0.0662572
MSX1	1.30374	0.0670934
MRC1L1	4.7924	0.0680543
RP11-557H15.4	4.01157	0.0682783
GGT1	2.09184	0.0689935
ZNF385D	2.54377	0.0692582
MOBP	3.36466	0.0694906
AQP3	2.19574	0.0696723
NEBL	1.47219	0.0709508
CSF1	1.14475	0.0715346
IGSF3	2.23676	0.0734991
MFI2	1.6016	0.0750647
NINJ2	1.70384	0.076936
RNU1-19P	2.83851	0.0794936
POSTN	3.27761	0.0800804
DCLK1	3.74479	0.0806411
CCL5	4.75431	0.0806411
C15orf52	1.24301	0.0812233
FRMD3	1.86925	0.0835082
TBX3	1.34653	0.0841818
PCDH17	2.35878	0.087175
BOK	1.00653	0.0879116
ABCA1	1.80872	0.0879268
MAST3	1.41213	0.0879268
SYT15	1.2305	0.0879268
CXCL1	1.35136	0.0905289
RP11-327L3.3	2.85301	0.0905882
ARVCF	1.14502	0.0921873
DNAH2	2.98481	0.094877
SNAPC1	1.2755	0.0953114
MPZL3	1.06795	0.0973245
RAB20	1.45752	0.0990002
HPSE	-1.79488	0.0996951
DYNC2H1	-1.02156	0.0996951
SPTBN5	-1.15943	0.0996951
PIK3CG	-1.30136	0.0992068
SLC39A8	-1.28922	0.0974855
ZNF816-ZNF321P	-3.29986	0.0968828
RAB34	-1.54344	0.0968828
DDX43	-3.94884	0.0963263
RNU7-1	-1.22716	0.0944538
SPECC1L-ADORA2A	-3.14724	0.0917295
CDH12	-5.15493	0.0908029
HMGA1	-1.17692	0.090355
SCARA3	-1.35641	0.0891566
CPXM1	-5.59177	0.0891566
XKR6	-4.73122	0.0891566
TFEC	-1.75571	0.0888238
MARK1	-2.39715	0.0881655
MFSD2A	-1.37239	0.0881579
MFNG	-1.15649	0.088016
ACSL1	-1.23405	0.0879268
ANKRD2	-2.09516	0.0874872
PDE3B	-3.32189	0.0841818
ZNF804A	-3.48213	0.0838122
PURG	-2.49226	0.0835082
RP11-111M22.2	-1.44918	0.0835082
PITPNM3	-1.94292	0.0835082
NAALAD2	-2.88503	0.0821502
RP11-706O15.5	-4.00233	0.0806411
PCDH18	-5.94847	0.0804792
FRAS1	-3.16761	0.0799553
RPS6KA5	-1.51581	0.0798116
BCL7A	-1.21148	0.0798116
CIDEA	-4.53094	0.0798116
RNU1-134P	-3.9144	0.0798116
DHCR24	-1.30315	0.0790202
HSPA2	-2.34138	0.0779195
RAB27B	-4.71112	0.0779195
COLEC12	-2.4775	0.0767187
MERTK	-1.70296	0.0760856
PAK1	-2.21554	0.0737082
SEMA4C	-1.45214	0.0736907
EXPH5	-4.0767	0.0712326
SLC7A7	-2.51648	0.0704679
DUSP4	-1.89296	0.0692801
PINLYP	-1.6885	0.0689935
DZIP1	-1.23923	0.0686359
NCR3LG1	-1.03625	0.0686359
ZYG11A	-1.4771	0.0680543
H1F0	-1.13413	0.0668995
SLC7A11-AS1	-2.71584	0.0665186
NOTCH2	-1.73794	0.0665186
PIM1	-1.77871	0.0622166
PRSS3	-1.23421	0.0619556
DPY19L2P2	-4.89456	0.0613341
AASS	-1.25534	0.0610574
GNAZ	-2.96832	0.0608792
SAMSN1	-2.92161	0.0596031
ADTRP	-2.37405	0.05909
SEMA6D	-1.66412	0.0583307
STK33	-3.28527	0.0577556
MGP	-1.66383	0.0566713
RP11-350J20.12	-1.45949	0.0566582
TMEM71	-2.64629	0.056171
NPAS2	-1.64899	0.0557223
MMP16	-1.76524	0.0556902
SFRP1	-2.30753	0.0548663
MIR155HG	-1.13779	0.0521698
TPD52	-2.13026	0.0516937
KLF12	-1.36986	0.0513641
LRRC17	-1.64115	0.0497139
MEIS2	-2.45799	0.047681
CPED1	-2.32127	0.0462652
FOXC1	-1.20273	0.0462652
PKIA	-1.07217	0.0459861
ABCA3	-1.97649	0.043765
DDR2	-1.90573	0.0435268
HIST1H3G	-1.80659	0.0419129
GDF6	-5.44528	0.0404579
SHISA2	-2.72809	0.039106
ACOT4	-1.99436	0.0386588
CRTAC1	-1.75216	0.0377956
HIST1H1A	-1.84526	0.0376393
MMRN1	-2.13391	0.0375918
ASGR1	-1.86946	0.0366992
C3orf58	-1.02679	0.0366992
RP11-879F14.2	-1.481	0.0362463
MEIOB	-3.58171	0.0362463
PLAG1	-1.3557	0.0359396
RP11-353N4.6	-4.83297	0.035399
CA8	-4.80371	0.0350784
GPR125	-1.57307	0.0338434
TFPI2	-2.59804	0.0329603
RENBP	-2.21793	0.0328115
HLA-V	-5.1311	0.0319804
ALDH1A1	-1.18356	0.0319804
TMEM45B	-5.20608	0.0314042
RP3-522D1.1	-2.43008	0.0304438
HIST1H2BI	-1.83465	0.0304173
GOLM1	-1.12173	0.0296302
CC2D2A	-1.49098	0.0294214
ATP6V0E2-AS1	-1.78805	0.029019
SRPX	-1.11327	0.0283635
CAMK1D	-2.38135	0.0283635
RGS5	-4.25617	0.0282184
SAMD12	-2.36047	0.0282184
CPXM2	-2.67912	0.0279827
KSR2	-2.33948	0.027951
GAMT	-1.30613	0.0265026
GCKR	-1.97305	0.0257233
CSF2RB	-1.72545	0.0246108
BCL2A1	-2.51444	0.0240436
KHK	-2.0865	0.0234086
SALL2	-5.17917	0.0233728
SERTAD4	-2.78213	0.0231849
SYDE2	-1.34233	0.0230996
KIAA1377	-1.45322	0.0230996
ACVR2B	-1.29713	0.0230545
GIMAP1	-1.15175	0.023053
GRB14	-1.0198	0.0227513
LYVE1	-2.66707	0.0226521
DAW1	-1.97152	0.0222972
BEX4	-1.29795	0.0222794
FSD1	-2.19747	0.0217997
ARHGDIG	-2.1032	0.0211041
TSPAN12	-1.1712	0.0209705
ZNF395	-1.69191	0.0209705
RUNX1T1	-1.60807	0.0209705
SPINT1	-2.34245	0.0208761
IRS2	-5.9979	0.0208761
CST1	-4.84607	0.0204843
TMEM98	-1.55366	0.0204397
TRO	-1.87612	0.0193234
TUB	-4.38325	0.0192104
GLUL	-1.05296	0.0190776
GSTO2	-1.36096	0.0187712
ATP6V0E2	-1.46196	0.0187712
DNAH8	-5.20834	0.0187712
MEST	-2.47224	0.0187712
KIF21A	-1.43585	0.0177483
SPINT2	-3.09271	0.017718
PLEKHH2	-2.48769	0.0173884
IGF1R	-2.70545	0.0172897
CPT1C	-1.18164	0.0168486
ITGB8	-2.62539	0.0168486
VASH1	-1.63237	0.0163264
LRP4	-2.27051	0.0160654
NLRP2	-4.77617	0.0157998
HOXA10-AS	-5.59238	0.0157956
CUL4B	-1.01239	0.0155209
ZNF620	-1.16389	0.0152874
CCDC88C	-1.6884	0.0137182
ZNF704	-2.04781	0.0133998
MSMP	-2.0817	0.0133998
MYRIP	-1.17343	0.0133721
FAM174B	-1.2972	0.0126132
ABCA8	-2.93255	0.0123165
AC073130.3	-3.6453	0.0116914
GALNT15	-2.76627	0.0115076
SAMD5	-3.86378	0.0115076
SCN8A	-3.2116	0.0115076
ANKRD18B	-3.60045	0.0112877
DOCK10	-1.15183	0.0112877
THBS2	-4.69525	0.0102462
PHGDH	-2.24034	0.00984407
RNU6-13P	-6.72688	0.00887423
KIF26A	-2.80032	0.00848226
SERPINB2	-2.64816	0.00825153
MBNL3	-2.38019	0.00813526
ANKLE1	-2.06701	0.00783052
HIST1H3E	-2.71289	0.00779856
HS6ST2	-5.87563	0.00779856
PAX8-AS1	-3.91583	0.00738607
MAN1C1	-2.0485	0.00684117
HTRA3	-1.92215	0.00683645
PARD3B	-1.35749	0.00664359
RAB38	-1.81856	0.00656035
NOX4	-2.14772	0.00644662
TRPC4	-5.82327	0.0059633
WDFY4	-1.87294	0.00584222
RGS11	-1.61088	0.00537535
TMEM38A	-1.8224	0.00535914
COL8A2	-2.37563	0.00437909
PYGO1	-3.03415	0.00412206
IRF6	-3.96031	0.00389172
MYO7A	-4.29024	0.00376527
FBLN2	-6.40982	0.00341893
TNFSF4	-2.7197	0.00331098
ENO2	-1.60055	0.00319905
ANKS6	-1.033	0.00314915
CCDC152	-2.49288	0.00310568
TRPS1	-2.73537	0.00310475
FBXO17	-1.47541	0.0029966
LRP3	-2.62036	0.00296555
06-sep	-1.04415	0.0029387
MST4	-3.3445	0.00241248
PRKCQ-AS1	-4.59958	0.00239101
RNLS	-2.7614	0.00224516
SLC1A4	-1.75429	0.00221084
SLC16A4	-2.95494	0.00212074
LRRK2	-5.51245	0.00205738
TNFSF15	-5.02698	0.00204089
KHDRBS3	-1.30017	0.00201486
GPR162	-2.61684	0.00199534
TTC39C	-1.92745	0.0017985
UCHL1	-2.04028	0.00154935
KIAA1244	-2.08291	0.0014928
MCTP2	-6.65171	0.00140648
LXN	-2.18598	0.00129034
OCLN	-3.70617	0.00128744
TWIST2	-6.0275	0.00128744
PTPN13	-6.58582	0.00111853
ABCA6	-3.45873	0.00106803
MAFF	-1.20624	0.00103009
FAM78A	-2.90036	0.0010108
EPS8	-2.39723	0.00090279
E2F5	-2.8141	0.00090279
SLAIN1	-2.70667	0.000749933
TSPAN8	-7.19443	0.000749933
PFN2	-2.03045	0.000719503
KCNJ12	-5.20447	0.00059409
FAM84B	-1.77646	0.000509514
TTLL7	-2.1411	0.00050822
TPM2	-3.24685	0.000506415
PRKAR2B	-2.54728	0.000506415
MME	-2.72305	0.000501333
GPR143	-1.95493	0.000412705
XIRP2	-6.4259	0.000399004
SNN	-1.05478	0.000399004
MEIS1	-7.63389	0.000326047
ENPP1	-3.10074	0.000324097
DTNA	-2.7213	0.000244826
SLC2A13	-2.23251	0.000240265
ARHGAP20	-4.24779	0.000181004
DMRTA1	-5.73647	0.000176597
PTGS1	-2.89779	0.000176597
GIMAP8	-1.83752	0.000176597
INO80C	-1.20671	0.000172993
HID1	-2.63044	0.000172993
CELF2	-2.22944	0.000153399
VAMP8	-2.25328	0.000126733
LONRF3	-3.26884	0.000125252
ITGB4	-2.05779	0.000125252
HMCN1	-5.16447	6.76e-05
SIX4	-3.29637	5.29e-05
KLHL23	-2.77061	4.57e-05
COL3A1	-4.79067	3.96e-05
BMPR1B	-4.46181	3.77e-05
RORA	-2.47668	1.84e-05
CBS	-2.86646	1.84e-05
REEP2	-2.57527	1.39e-05
TMEM170B	-3.86783	1.26e-05
LIN7A	-5.54606	1.24e-05
ST8SIA4	-2.91785	1.22e-05
RNU6-9	-20.9368	6.78e-06
HMGA2	-2.61478	4.54e-06
MTUS1	-1.55867	4.27e-06
TRBC2	-7.1525	3.14e-06
HIST3H2A	-2.70254	2.75e-06
CDCA7L	-1.41445	2.23e-06
SHROOM3	-3.05387	1.36e-06
LAMA3	-1.75149	8.4e-07
RP11-1002K11.1	-4.23026	5.83e-07
IGF2BP1	-7.08381	5.26e-07
MMP1	-2.48681	3.67e-07
GABBR2	-3.82629	3.67e-07
AR	-3.41255	3.62e-07
SNORD116-7	-22.4141	2.85e-07
TCEAL7	-3.60831	7e-08
RP11-137H2.6	-1.56028	5.79e-08
FRMD5	-4.03297	4.49e-08
CPE	-9.74531	2.96e-08
FAM213A	-1.47353	2.34e-08
PCDH7	-5.00528	1.96e-08
NREP	-1.35489	1.87e-08
NRG1	-4.39928	1.87e-08
GIMAP4	-3.23187	1.87e-08
NALCN	-3.27122	1.53e-08
CRISPLD1	-5.55504	1.12e-08
HIST3H2BB	-3.03589	3.81e-09
F2RL1	-2.92449	4.31e-12
WSCD1	-2.79999	2.18e-13

## Sheet: B3. GO_PIK3CA
B3. GO Analysis
BIOLOGICAL PROCESSES in PIK3CAH1047R vrs. PIK3CAwt-transduced or non-transduced HUVECs
TermID	Term	Enrichment	logP	Genes in Term	Target Genes in Term	Total Target Genes	Gene Symbols
GO:0030198	ECM organization	1.68639e-05	-4.77304	300	19	268	LAMA5;VCAM1;ITGB3;PAPLN;PDGFB;THBS1;MMP10;HAPLN1;THSD4;ADAMTS4;ADAMTS5;COL3A1;VCAN;ADAMTS1;ADAMTS18;TLL1;TGFBI;A2M;CD44
GO:0030155	regulation of cell adhesion	0.00406822	-2.3906	133	10	268	TNFSF18;NUAK1;PLAU;PODXL;HYAL1;C2CD4A;LPXN;PLXNA1;C2CD4B;TGFBI
GO:0045428	regulation of NO biosynthetic process	0.00406822	-2.3906	40	6	268	EDN1;CAV1;CD36;PTGS2;CLU;CD34
GO:0030195	negative regulation of blood coagulation	0.00406822	-2.3906	40	6	268	EDN1;PLAU;PDGFB;PLAT;A2M;CD34
GO:1904752	regulation of vascular SMC migration	0.00406822	-2.3906	12	4	268	IGFBP5;ADAMTS1;PDGFB;PRKG1
GO:0048661	positive regulation of SMC proliferation	0.00721658	-2.14167	46	6	268	BMP4;EDN1;IGFBP5;ADAMTS1;PDGFB;THBS1
GO:0050922	negative regulation of chemotaxis	0.0112526	-1.94875	32	5	268	ANGPT2;SEMA3D;SEMA3A;SEMA3F;THBS1
GO:0010594	regulation of EC migration	0.0274995	-1.56067	89	7	268	DLL4;BMP4;EDN1;ITGB3;ATOH8;STC1;THBS1
GO:0022411	cellular component disassembly	0.0287292	-1.54168	66	6	268	ADAMTS4;ADAMTS5;TLL1;A2M;MMP10;CD44
GO:0002576	platelet degranulation	0.0287292	-1.54168	125	8	268	SELP;MMRN1;ITGB3;PDGFB;CD36;A2M;CLU;THBS1
GO:0042632	cholesterol homeostasis	0.0287292	-1.54168	71	6	268	ABCA1;GRAMD1B;ACSM3;INSIG1;CAV1;LIPG
GO:0007411	axon guidance	0.0287292	-1.54168	203	10	268	LAMA5;EFNB3;UNC5B;SEMA3D;SEMA3A;NRXN3;NTN4;PLXNA1;IRS2;SEMA3F
GO:2000379	positive regulation of ROS metabolic process	0.0301517	-1.52069	49	5	268	CDKN1A;PDGFB;AKR1C3;CD36;THBS1
GO:0014068	positive regulation of PI3K signaling	0.0326017	-1.48676	77	6	268	SELP;CSF3;UNC5B;PDGFB;IRS2;ROR1
GO:0045055	regulated exocytosis	0.037603	-1.42478	180	9	268	SELP;MMRN1;ITGB3;PDGFB;CD36;A2M;CLU;THBS1;STX1A
GO:0006027	glycosaminoglycan catabolic process	0.0397528	-1.40063	56	5	268	VCAN;HYAL1;SDC1;HPSE;CD44
GO:0001936	regulation of EC proliferation	0.05019	-1.29938	92	6	268	BMP4;ITGB3;CAV1;ATOH8;PDGFB;THBS1
GO:0010942	positive regulation of cell death	0.0563739	-1.24892	66	5	268	BMP4;DDIT4;AKR1C3;CD36;CLU
GO:0007229	integrin-mediated signaling pathway	0.0764278	-1.11675	75	5	268	LAMA5;COL3A1;ADAMTS1;ITGB3;ITGBL1
GO:0070372	regulation of ERK1 and ERK2 cascade	0.0983485	-1.00723	238	9	268	CCL14;TGFBR3;CCL23;PDGFB;ROR1;SPRY1;CD36;HLA-DRB1;CD44

## Sheet: C3. DEGs_PIK3CA
C3. Differentially regulated genes in PIK3CAH1047R than PIK3CAwt-transduced or non-transduced HUVECs
Symbol	PIK3CAH1047R vs. PIK3CAwt log2FC	PIK3CAH1047R vs. PIK3CAwt Padj	PIK3CAH1047R vs. non-tr log2FC	PIK3CAH1047R vs. non-tr Padj	PIK3CAwt vs. non-tr log2FC	PIK3CAwt vs. non-tr Padj
A2M	-2.22763	0.0288824	-2.00526	0.0434836	0.222365	NA
ABCA1	-1.00781	0.0196582	-1.04305	0.00960131	-0.0352355	NA
ABCA6	-1.72898	3.47925e-06	-2.22155	1.01649e-10	-0.492567	0.309543
AC003051.1	2.79509	2.77249e-09	4.14502	1.71396e-12	1.34993	NA
AC073130.1	-1.35497	0.00404154	-1.35767	0.00253715	-0.0026963	0.999221
AC139099.3	-1.85852	0.0823099	-1.7441	0.0834391	0.114422	NA
ACSM3	-1.34482	0.0184422	-2.11971	4.63279e-06	-0.774898	NA
ADAMTS1	1.66255	5.63999e-16	3.67307	1.63796e-58	2.01052	1.76719e-15
ADAMTS18	1.57309	1.12644e-25	3.31053	1.1938e-72	1.73744	5.55142e-17
ADAMTS4	1.5648	4.63567e-31	1.73683	6.72569e-38	0.172027	0.556222
ADAMTS5	5.73281	8.45433e-14	7.70644	1.93725e-11	1.97362	NA
ADCY7	1.27123	0.0089232	1.20333	0.0096895	-0.0678988	NA
ADIRF	1.00237	0.00186355	1.32558	1.12454e-05	0.323203	0.598997
AGPAT9	1.15881	0.00489353	2.44018	1.22695e-08	1.28136	NA
AIF1L	-1.19539	4.17642e-09	-1.56956	2.02448e-16	-0.374173	0.169972
AIM1	-1.17336	5.62378e-09	-1.73507	4.83114e-21	-0.561706	0.00915425
AK5	-1.66956	8.86796e-06	-2.49665	4.19966e-14	-0.827091	0.010965
AKR1C3	-1.13038	0.0249963	-1.26706	0.00536014	-0.136681	0.892376
ALDH1A1	-1.90208	9.27179e-49	-2.01846	1.77034e-55	-0.116387	0.650573
ALS2CL	1.39529	0.0634377	1.69417	0.01691	0.298884	NA
AMOTL2	-1.05467	2.07408e-10	-1.00653	1.10803e-09	0.0481433	0.91296
AMPH	-1.15733	0.0497712	-1.26807	0.0173991	-0.110734	NA
ANGPT2	-1.28295	1.69395e-18	-1.74174	7.3523e-35	-0.458784	0.0183946
ANGPTL4	1.71698	2.87092e-12	2.50871	7.73574e-22	0.791731	0.0553327
ANK3	1.61322	0.00318051	1.87103	0.000516203	0.257812	NA
ANKRD1	-1.3892	2.1145e-30	-1.12614	4.0176e-20	0.26306	0.186795
APOLD1	1.64105	1.80952e-09	2.09762	5.78274e-14	0.456577	0.424112
ARMCX2	1.07933	3.77162e-35	1.31882	1.59499e-50	0.23949	0.100873
ART4	-1.54994	2.16501e-08	-2.00461	8.50055e-15	-0.454676	0.189995
ATOH8	-1.93904	1.91098e-07	-2.19661	6.47128e-10	-0.257566	0.68075
ATP8B3	1.77619	0.0455785	1.52538	0.0690483	-0.250811	NA
B3GALT4	-1.05441	0.087701	-1.53995	0.00187962	-0.485544	NA
BACH1	-1.01377	0.0176573	-1.13359	0.0034599	-0.119821	0.891645
BAIAP2L1	1.61101	0.0453987	1.64374	0.0299639	0.0327289	NA
BCL2A1	1.17377	0.00711754	6.32511	5.04199e-08	5.15135	NA
BEX2	-1.11462	0.0273804	-1.04497	0.0308886	0.0696503	NA
BMP4	-2.48752	7.07646e-91	-2.6199	4.32757e-101	-0.132373	0.610441
C10orf10	-1.04481	4.53982e-20	-1.68649	3.52048e-54	-0.641686	1.49676e-07
C11orf96	1.17914	6.52543e-08	1.3813	1.81938e-10	0.202157	0.697798
C15orf54	-2.1027	0.000125283	-2.39292	2.96189e-06	-0.290228	NA
C19orf70	1.75344	7.34893e-12	1.49766	1.89835e-09	-0.255782	0.681446
C1orf226	-1.04155	0.0737554	-1.15994	0.025115	-0.11839	NA
C2CD4A	-1.86018	0.00715767	-1.80114	0.00665445	0.0590395	NA
C2CD4B	-1.83803	4.16209e-11	-2.21183	8.55104e-17	-0.373795	0.333926
C6orf132	-1.33904	0.0095623	-1.41118	0.00336807	-0.0721319	0.945451
C6orf141	-1.76523	0.0449848	-2.15161	0.00469664	-0.386383	NA
CARD16	-1.08833	2.80542e-14	-1.32534	4.87127e-22	-0.237007	0.247516
CASP1	-1.03897	0.0561342	-1.3782	0.002522	-0.339227	NA
CAV1	-1.11976	2.18065e-100	-1.28574	3.30607e-133	-0.165981	0.0278922
CBLN2	-2.1699	0.0315801	-2.6138	0.00294234	-0.443897	NA
CCDC19	1.59898	0.0550283	2.73455	0.00154367	1.13557	NA
CCL14	-2.35609	6.40645e-77	-2.64042	3.13218e-98	-0.284322	0.0706075
CCL23	-2.44362	1.65982e-14	-3.28219	6.20369e-28	-0.838569	0.00111638
CCNA1	2.50941	2.12212e-07	3.97894	2.32736e-10	1.46953	NA
CCNE2	-1.23573	0.037375	-1.02556	0.0834125	0.210179	NA
CD34	-1.72338	9.84245e-26	-2.13473	2.84229e-41	-0.411345	0.0281696
CD36	-2.02751	0.0128938	-2.05113	0.00750766	-0.0236213	NA
CD44	1.86135	9.816e-25	2.45815	4.99381e-36	0.596802	0.0683739
CDCP1	2.8417	1.82205e-30	6.32782	3.92485e-26	3.48612	1.16233e-06
CDKN1A	1.07394	5.20708e-31	1.43372	1.47941e-54	0.359777	0.00492792
CHAC1	1.02174	0.000619428	1.23892	1.39655e-05	0.217177	0.750886
CITED2	-2.11123	5.00406e-09	-2.16622	9.04113e-10	-0.0549861	0.954131
CLDND2	1.67107	0.0338123	1.52812	0.0393383	-0.142949	NA
CLEC2B	-1.82404	2.65314e-16	-2.25316	6.17393e-26	-0.429112	0.128573
CLU	-1.80466	9.99779e-31	-1.75837	2.35407e-29	0.0462917	0.920474
COL3A1	-1.65037	1.60783e-06	-1.42119	4.84739e-05	0.22918	0.734955
COLEC12	-1.092	0.00158435	-1.57648	1.61471e-07	-0.484482	0.264685
CPA3	-1.46104	0.0761526	-1.74104	0.0144051	-0.279996	NA
CREBRF	-1.17826	1.75955e-07	-1.30108	1.97435e-09	-0.122825	0.790921
CSF3	1.46944	0.000788528	2.59349	9.39413e-08	1.12405	NA
CTA-204B4.2	-1.42435	0.0841609	-1.58741	0.0293962	-0.163057	NA
CTGF	-1.8554	6.71053e-52	-1.98693	5.84747e-60	-0.131524	0.619772
CYR61	-1.09454	0.000489673	-1.20415	4.85512e-05	-0.10961	0.889906
DACH1	-1.94973	4.3142e-21	-2.37392	1.0187e-32	-0.424195	0.0618036
DCAF12L1	-1.59478	0.00428509	-1.14173	0.0610439	0.453048	NA
DDIT4	2.01123	2.11481e-31	1.74035	1.18027e-24	-0.27088	0.462954
DIRAS3	2.09755	8.72814e-07	2.99731	3.315e-10	0.899763	NA
DLL3	1.24122	0.00979795	1.33403	0.00339991	0.0928076	NA
DLL4	-1.32763	0.0139188	-1.52388	0.00175668	-0.196251	NA
DNAJC6	-1.70076	0.00282415	-1.23647	0.0449428	0.464284	NA
DPYD	-1.17256	0.0123558	-1.35511	0.00136372	-0.182546	0.841369
DUSP8	1.60542	0.00070164	1.78142	0.000154643	0.176004	0.902894
EDN1	-2.18181	7.80129e-170	-2.27796	1.95001e-185	-0.0961572	0.540859
EFCAB4A	-1.49613	2.92224e-05	-1.54381	8.20839e-06	-0.0476769	0.954408
EFNB3	-1.5633	0.0646676	-1.97984	0.00565839	-0.416543	NA
EMP3	1.85231	2.46639e-18	2.69704	7.2792e-30	0.844729	0.0223777
EPS8	-1.22522	9.48952e-05	-1.78889	1.46941e-10	-0.563674	0.140785
FABP4	-2.02846	1.66157e-42	-2.39653	2.24858e-60	-0.368071	0.0816831
FAM86DP	1.16982	0.0093489	1.25157	0.00338038	0.0817577	0.945451
FBXO32	-1.60157	1.56089e-08	-2.0011	7.04419e-14	-0.399531	0.339028
FILIP1	-1.44811	3.0798e-08	-2.03021	4.3923e-17	-0.5821	0.0571572
FRMD3	1.47957	1.59669e-22	2.00692	4.27901e-36	0.527351	0.0378538
FZD1	-2.50773	0.0191889	-2.30186	0.0270566	0.205871	NA
GABBR2	1.15674	2.44382e-12	1.53736	5.4008e-21	0.38062	0.167929
GAL	1.05385	0.000128764	1.79751	7.47099e-11	0.743661	0.0845584
GALNT12	2.9306	0.00104519	2.88828	0.000826746	-0.0423238	NA
GALNT15	-1.21467	0.00920162	-1.71045	1.63359e-05	-0.495781	0.403613
GALNT6	1.15803	2.54196e-20	1.35212	4.42422e-27	0.194085	0.452182
GFPT2	1.55859	5.78751e-05	1.8143	2.25599e-06	0.255712	0.803457
GIMAP4	-1.1341	1.74919e-39	-1.4339	3.13604e-64	-0.299802	0.0090072
GIMAP5	-1.2982	6.65785e-06	-1.56866	6.67401e-09	-0.27046	0.591119
GIMAP7	-1.36678	2.12768e-20	-1.61534	4.56227e-29	-0.248557	0.318459
GIMAP8	-1.00789	3.14029e-37	-1.27431	4.48565e-61	-0.266415	0.00832249
GIPC2	-1.15789	4.17642e-09	-1.48507	1.02821e-15	-0.327175	0.217471
GJA5	2.10601	4.85621e-05	2.41756	2.64832e-06	0.311545	NA
GPR37	1.01535	0.00377393	1.42849	1.69862e-05	0.413141	0.533723
GPRIN3	-1.62307	0.044162	-1.64972	0.0276545	-0.0266456	NA
GRAMD1B	2.11797	1.38298e-07	1.66695	1.49419e-05	-0.451019	NA
GSDMC	1.07111	0.0554071	2.04349	0.000139343	0.972375	NA
HAPLN1	1.11739	0.0607381	1.98642	0.000235576	0.869023	NA
HES2	1.74529	3.30744e-17	2.57842	1.48941e-30	0.833129	0.0131877
HLA-DRB1	1.64927	0.0465741	2.11186	0.00923323	0.462581	NA
HMGCS1	1.33999	1.56481e-36	1.2292	3.64797e-31	-0.110783	0.650573
HMHA1	-1.73507	0.00137439	-2.22597	3.80833e-06	-0.490899	NA
HPSE	1.27687	3.98709e-07	1.49492	2.99871e-09	0.218051	0.735019
HSBP1L1	-1.27917	0.000405316	-1.29195	0.000214117	-0.0127855	0.988608
HSD17B2	-2.50741	0.0322125	-2.28822	0.0447824	0.219195	NA
HSPA12B	1.01789	2.36744e-06	1.08862	2.73706e-07	0.0707298	0.91296
HYAL1	2.07603	0.00333881	1.64603	0.013621	-0.429995	NA
IGFBP1	-1.73289	8.17502e-05	-2.26401	1.20124e-08	-0.531117	0.324034
IGFBP5	3.23757	0.00189031	4.75395	4.09264e-06	1.51637	NA
INPP4B	-1.0851	0.00636634	-1.28735	0.000318333	-0.202241	0.773824
INSIG1	1.35829	1.51687e-42	1.74522	3.34215e-66	0.386928	0.00958652
IRS2	-2.06645	1.54694e-21	-2.51478	4.14561e-33	-0.448328	0.0855293
ITGB3	1.1389	2.35009e-06	1.06248	7.94737e-06	-0.0764217	0.916443
ITGBL1	-1.52531	0.00292992	-1.43422	0.00431272	0.0910901	NA
KAZN	-1.01048	0.0375971	-1.25999	0.00271452	-0.249509	NA
KCNAB1	1.00785	8.32185e-18	2.49174	5.84719e-79	1.48389	1.17548e-24
KIAA1324L	-1.05641	0.000522453	-1.52558	1.34875e-08	-0.469179	0.228766
KITLG	1.06876	6.47202e-05	2.7005	3.78619e-23	1.63174	3.61415e-07
KRT15	2.01432	3.99048e-08	3.08312	8.0579e-13	1.0688	NA
LAMA5	1.0054	1.64472e-14	1.43815	2.11262e-27	0.432744	0.031376
LINC00520	2.64349	1.87375e-14	2.58433	4.17637e-14	-0.0591597	0.960252
LINC00704	-1.3958	1.04414e-23	-1.94609	4.04589e-49	-0.550287	6.02919e-05
LINC01013	-1.30041	1.4991e-11	-1.71257	5.6132e-21	-0.412159	0.094803
LINC01094	-1.12686	0.062784	-1.01747	0.0821005	0.109381	NA
LIPG	1.56424	7.32571e-13	1.7885	2.15916e-16	0.224269	0.65558
LPXN	1.56935	3.55699e-10	3.14757	1.04609e-24	1.57822	5.97377e-05
LRRC2	-1.41443	0.0531314	-1.59631	0.0144133	-0.181881	NA
LY6K	-1.01789	0.0190183	-1.25528	0.00100386	-0.237382	0.750886
LYPD1	1.29083	6.71755e-10	2.64647	7.01245e-27	1.35565	1.28381e-05
MAL2	-2.89092	0.00131235	-3.56821	1.03553e-05	-0.67729	NA
MAP1A	1.00009	0.0014076	2.0778	4.53573e-12	1.07771	0.0086743
MATN2	-1.63073	8.19009e-05	-1.08851	0.0178017	0.542218	NA
MBP	1.10551	0.0201702	1.01141	0.026174	-0.0940989	NA
MCTP1	-1.28773	1.36092e-18	-1.4326	1.65753e-23	-0.144869	0.61241
MEI1	1.26804	0.0593319	1.54185	0.013982	0.273809	NA
MEOX2	-1.79821	4.16965e-08	-1.90102	2.43696e-09	-0.102804	0.887525
MEST	-1.89265	4.62909e-12	-1.75217	1.54028e-10	0.140487	0.82923
MGARP	-1.82534	2.7754e-19	-1.75878	5.54141e-18	0.0665577	0.889751
MMP10	-1.67275	3.53664e-06	-1.68915	1.64138e-06	-0.0164013	0.985837
MMRN1	-1.284	4.77604e-05	-1.44626	1.46902e-06	-0.162258	0.829438
MPZL2	1.44244	1.99432e-71	1.60594	1.30846e-86	0.163497	0.29043
MT1E	-2.34035	1.93338e-94	-1.8642	5.18915e-58	0.476145	8.15022e-05
MT1M	-2.20156	0.00247157	-1.91386	0.00941726	0.287704	NA
MYCN	-1.36547	0.0137679	-2.58665	1.63629e-09	-1.22118	NA
MYRIP	-1.10304	0.000413346	-1.17105	8.07032e-05	-0.0680148	0.928778
N4BP2	1.16957	1.52029e-05	1.64114	6.69899e-10	0.471563	0.341499
NALCN	-1.41582	0.00045918	-1.58539	2.6513e-05	-0.169578	0.824066
NCKAP5	3.06015	0.000342702	3.5602	7.83405e-05	0.500047	NA
NDRG1	1.14631	1.13533e-22	1.19503	1.76065e-24	0.0487233	0.89457
NLGN1	1.03369	1.30008e-07	1.29849	3.06761e-11	0.264798	0.524421
NOL5BP	2.12124	1.03361e-06	2.53967	1.78047e-08	0.418427	NA
NOTCH2NL	1.07614	2.12057e-07	1.35372	4.82643e-11	0.277578	0.522128
NRXN3	1.88735	0.0059392	3.18208	5.05356e-05	1.29473	NA
NTN4	-2.20739	1.36273e-09	-2.37394	2.23696e-11	-0.166545	0.850367
NUAK1	-1.22448	3.15847e-13	-1.63564	1.2777e-24	-0.411162	0.0534253
NUPR1	-1.68034	0.0439694	-1.42064	0.0861288	0.259703	NA
NXPH3	-1.7213	0.0874667	-2.06845	0.0167564	-0.347151	NA
PALD1	-1.24645	0.000134796	-1.69241	7.38899e-09	-0.445963	0.294467
PAPLN	-1.03834	0.0400131	-1.09702	0.0184203	-0.0586782	NA
PDE10A	1.0277	0.00279711	1.34187	4.37919e-05	0.314167	0.659014
PDE1C	-1.53189	0.00101561	-1.4786	0.00117345	0.0532875	0.954438
PDE9A	-1.45252	0.0919152	-1.39228	0.0848357	0.0602351	NA
PDGFB	-1.88748	1.15529e-05	-2.29552	1.43228e-08	-0.408034	0.613048
PDK4	-1.08795	0.0166862	-1.50364	0.000109796	-0.415692	0.523765
PIEZO2	-1.12376	0.0076463	-1.46408	7.39784e-05	-0.340324	0.596988
PIK3R3	1.13823	4.79445e-14	1.16795	8.23049e-15	0.0297237	0.951113
PIM3	-1.17078	1.17253e-71	-1.64056	2.95321e-143	-0.469784	1.51392e-11
PLAC8	-1.536	0.00037485	-1.43358	0.000791634	0.102423	0.913938
PLAT	1.69658	4.83043e-36	2.93208	9.25987e-99	1.23551	1.36607e-15
PLAU	1.0956	0.00111805	1.95445	1.12214e-10	0.858847	0.0477904
PLEK2	1.52039	2.40765e-10	2.50571	3.72963e-21	0.985321	0.0115725
PLVAP	1.0848	0.000337853	1.21222	2.93639e-05	0.127417	0.875182
PLXNA1	1.11001	4.95231e-10	1.39689	8.9036e-15	0.286882	0.440627
PNMA6A	-1.84068	0.00191561	-2.05239	0.000191441	-0.211712	NA
PODXL	1.14556	1.76109e-13	1.25119	2.95084e-16	0.105627	0.788111
POU2F2	-1.02857	3.06758e-09	-1.01511	3.42883e-09	0.0134559	0.974898
PPAP2B	1.65444	1.13249e-35	1.91204	6.56576e-46	0.2576	0.326667
PPAP2C	1.21976	2.2661e-05	1.17286	3.15705e-05	-0.0469084	0.955322
PPP1R9A	-1.16856	0.0314542	-1.58544	0.00053797	-0.416876	NA
PRKG1	1.47781	0.0068368	1.72291	0.00100211	0.245103	NA
PRSS3	1.57929	1.67093e-33	2.632	1.905e-66	1.05272	3.33131e-08
PTCHD4	1.00085	0.0722162	1.42268	0.0045962	0.421833	NA
PTGS2	1.21332	8.16123e-17	1.51947	2.08081e-24	0.306147	0.280297
PTHLH	2.70192	4.26009e-06	3.83175	1.25008e-07	1.12983	NA
RASGRF2	1.7176	0.0206575	1.57874	0.0246971	-0.138861	NA
RGAG4	-2.06784	0.000401119	-1.45251	0.0235811	0.615338	NA
ROR1	1.10386	0.0171605	1.88312	1.20501e-05	0.779264	0.288762
RP11-131L23.2	-1.88742	0.000717814	-2.08035	6.73461e-05	-0.192932	NA
RP11-166D19.1	1.11968	0.000261025	1.10644	0.000210366	-0.0132332	0.989153
RP11-184M15.1	1.84845	0.000290534	2.732	1.49722e-06	0.883552	NA
RP11-420G6.4	-1.39197	0.0239579	-1.40153	0.0155114	-0.00956037	NA
RP11-693N9.2	-1.11488	9.51047e-12	-1.53873	1.24556e-23	-0.423854	0.0290863
RP11-706O15.3	1.17243	0.0168154	1.52333	0.000946677	0.350896	NA
RP11-720L2.3	-1.33066	0.0785579	-1.88019	0.00209421	-0.549528	NA
RP11-736K20.5	1.0454	1.34787e-06	1.20775	1.42593e-08	0.16235	0.767422
RP11-82L18.2	1.42601	0.0662843	1.66303	0.0208052	0.237023	NA
RP4-765C7.2	-1.13722	0.0105679	-1.33789	0.000833897	-0.200675	0.812461
RRP7B	1.29156	3.68567e-05	2.24953	3.20676e-12	0.957975	0.0495055
SDC1	1.04175	0.0152318	1.45771	0.000242443	0.415961	NA
SELP	-1.73706	0.010912	-1.2491	0.09095	0.487959	NA
SEMA3A	2.23932	3.469e-13	3.20989	5.36173e-18	0.970573	NA
SEMA3D	1.54434	0.00260502	2.34393	1.03328e-05	0.799584	NA
SEMA3F	1.18152	2.64849e-14	1.34305	2.84856e-18	0.161526	0.644361
SERPIND1	2.36426	5.24533e-38	4.89535	1.15364e-79	2.53109	2.07011e-18
SERTAD4	-1.64375	4.73343e-08	-2.05345	3.69058e-13	-0.409694	0.314637
SERTAD4-AS1	-1.39325	0.000345772	-2.20458	4.50333e-11	-0.811335	0.0370073
SETBP1	-1.20256	2.66669e-05	-1.33635	8.91824e-07	-0.13379	0.82518
SHISA2	1.65443	1.05626e-05	1.62268	1.06275e-05	-0.0317497	NA
SLC16A9	1.3243	0.0516869	2.89187	3.97849e-05	1.56757	NA
SLC25A30	-1.01468	0.0157463	-1.08352	0.00522851	-0.0688346	0.941308
SLC30A3	-1.13874	2.48308e-05	-1.32131	2.13654e-07	-0.182574	0.740426
SLC7A7	-1.30628	2.23113e-07	-1.87709	2.43353e-16	-0.570815	0.0333579
SLC7A8	1.13713	0.00950637	2.247	2.41342e-07	1.10987	NA
SLCO2A1	1.24937	4.06299e-08	1.86958	2.31515e-15	0.620209	0.111404
SPINT2	-1.30235	7.47597e-06	-1.95323	7.12847e-14	-0.650876	0.0489305
SPNS2	-1.17932	4.40718e-17	-1.45501	6.79188e-27	-0.275688	0.169972
SPRY1	-1.9508	1.50691e-07	-2.06021	1.05535e-08	-0.109411	0.89146
STC1	3.57357	3.98165e-122	3.78906	1.863e-127	0.215489	0.583142
STMN3	-1.11804	0.00531688	-1.1684	0.00191699	-0.0503548	0.954099
STX1A	1.49724	5.24673e-06	1.01613	0.00184	-0.481107	0.435164
TACSTD2	-1.07476	4.70341e-06	-1.16658	2.39865e-07	-0.0918219	0.87821
TCF15	1.81551	1.33378e-23	2.71047	4.40474e-44	0.894965	0.000812788
TENM3	1.44932	7.00299e-05	2.02464	4.07552e-08	0.575324	0.434387
TFPI2	1.76064	4.59961e-33	2.35472	7.88814e-55	0.594087	0.00638785
TGFBI	1.79411	2.44755e-15	2.02941	6.3414e-19	0.235295	0.667089
TGFBR3	-1.32659	3.6098e-11	-1.15971	1.17852e-08	0.166879	0.66728
THBS1	-1.94829	5.55852e-94	-2.1585	8.40585e-116	-0.210205	0.181182
THSD4	1.73754	2.88402e-38	1.55946	3.72392e-32	-0.178083	0.577035
THSD7A	-1.04733	1.53485e-10	-1.65588	7.59995e-28	-0.608548	0.00057291
TLL1	1.14099	0.000367438	2.11203	1.01445e-11	0.971037	0.0304686
TM4SF18	-1.97668	1.7439e-25	-2.36178	2.37802e-37	-0.385096	0.14648
TMEM156	1.4869	0.0276592	1.55267	0.0147677	0.0657694	NA
TMEM158	2.18345	1.91317e-64	5.13131	1.09173e-115	2.94787	8.55305e-34
TMEM163	-2.08971	0.0206575	-2.31941	0.00452283	-0.229695	NA
TMEM233	1.70624	8.57131e-17	2.11448	1.38616e-23	0.408234	0.325617
TMEM71	2.38208	8.22414e-07	2.53815	1.42991e-07	0.156074	NA
TNFSF18	-2.34146	0.00042337	-2.14808	0.00117101	0.193378	NA
TPD52	-1.16824	2.2992e-06	-1.40724	1.29135e-09	-0.238995	0.550665
TRAC	1.54819	0.0160841	1.28647	0.0360689	-0.261719	NA
TSPAN7	-1.27351	1.71854e-07	-1.23943	2.6931e-07	0.0340848	0.955322
TSPAN8	-1.21089	0.0748851	-1.43718	0.0146219	-0.226284	NA
TTTY15	-1.04742	0.0242737	-1.09153	0.0113952	-0.0441134	0.964384
TUBB2B	1.57715	0.000690266	1.9497	2.74811e-05	0.372547	0.750886
TXNIP	-1.15601	0.0206973	-1.85618	9.32715e-06	-0.700172	0.289171
TYW1B	-1.06538	0.0089232	-1.25671	0.000606598	-0.191331	0.798411
UNC5B	1.67237	3.82778e-06	2.40497	1.49623e-10	0.732599	NA
USP53	1.14572	3.09175e-24	1.06122	3.51893e-21	-0.0845002	0.784486
VCAM1	1.42113	1.19284e-06	1.8965	2.16514e-10	0.475373	0.435164
VCAN	2.56556	6.98408e-05	2.39132	0.000117475	-0.174239	NA
VDR	2.05068	0.00171982	1.49476	0.0149635	-0.555921	NA
XIST	1.73267	1.00439e-15	1.72817	9.4204e-16	-0.00450281	0.996358
YPEL2	-1.39949	7.64468e-11	-1.78981	1.50959e-18	-0.390321	0.174525
ZFY	-1.3219	0.00714455	-1.02358	0.0450769	0.298328	NA
ZNF134	-1.05005	0.0718935	-1.01283	0.0644901	0.0372167	NA
ZNF252P	-1.2726	6.3593e-05	-1.11919	0.000504201	0.153415	0.816201
ZNF704	-1.32297	0.00010996	-1.81234	3.03597e-09	-0.489373	0.245041
